# Supplementary material for: Antenatal corticosteroids in specific groups at risk of preterm birth: a systematic review
Source: PubMed Central journal article supplement — BMJ Open. 2023 Sep 22;13(9):e065070. doi: 10.1136/bmjopen-2022-065070 (PMC10533784; doi:10.1136/bmjopen-2022-065070), 2023-09-22

Supplementary file 2: PRISMA flow diagrams

Figure 1: Flow diagram of search results and study selection for women with pregestational and/or gestational diabetes

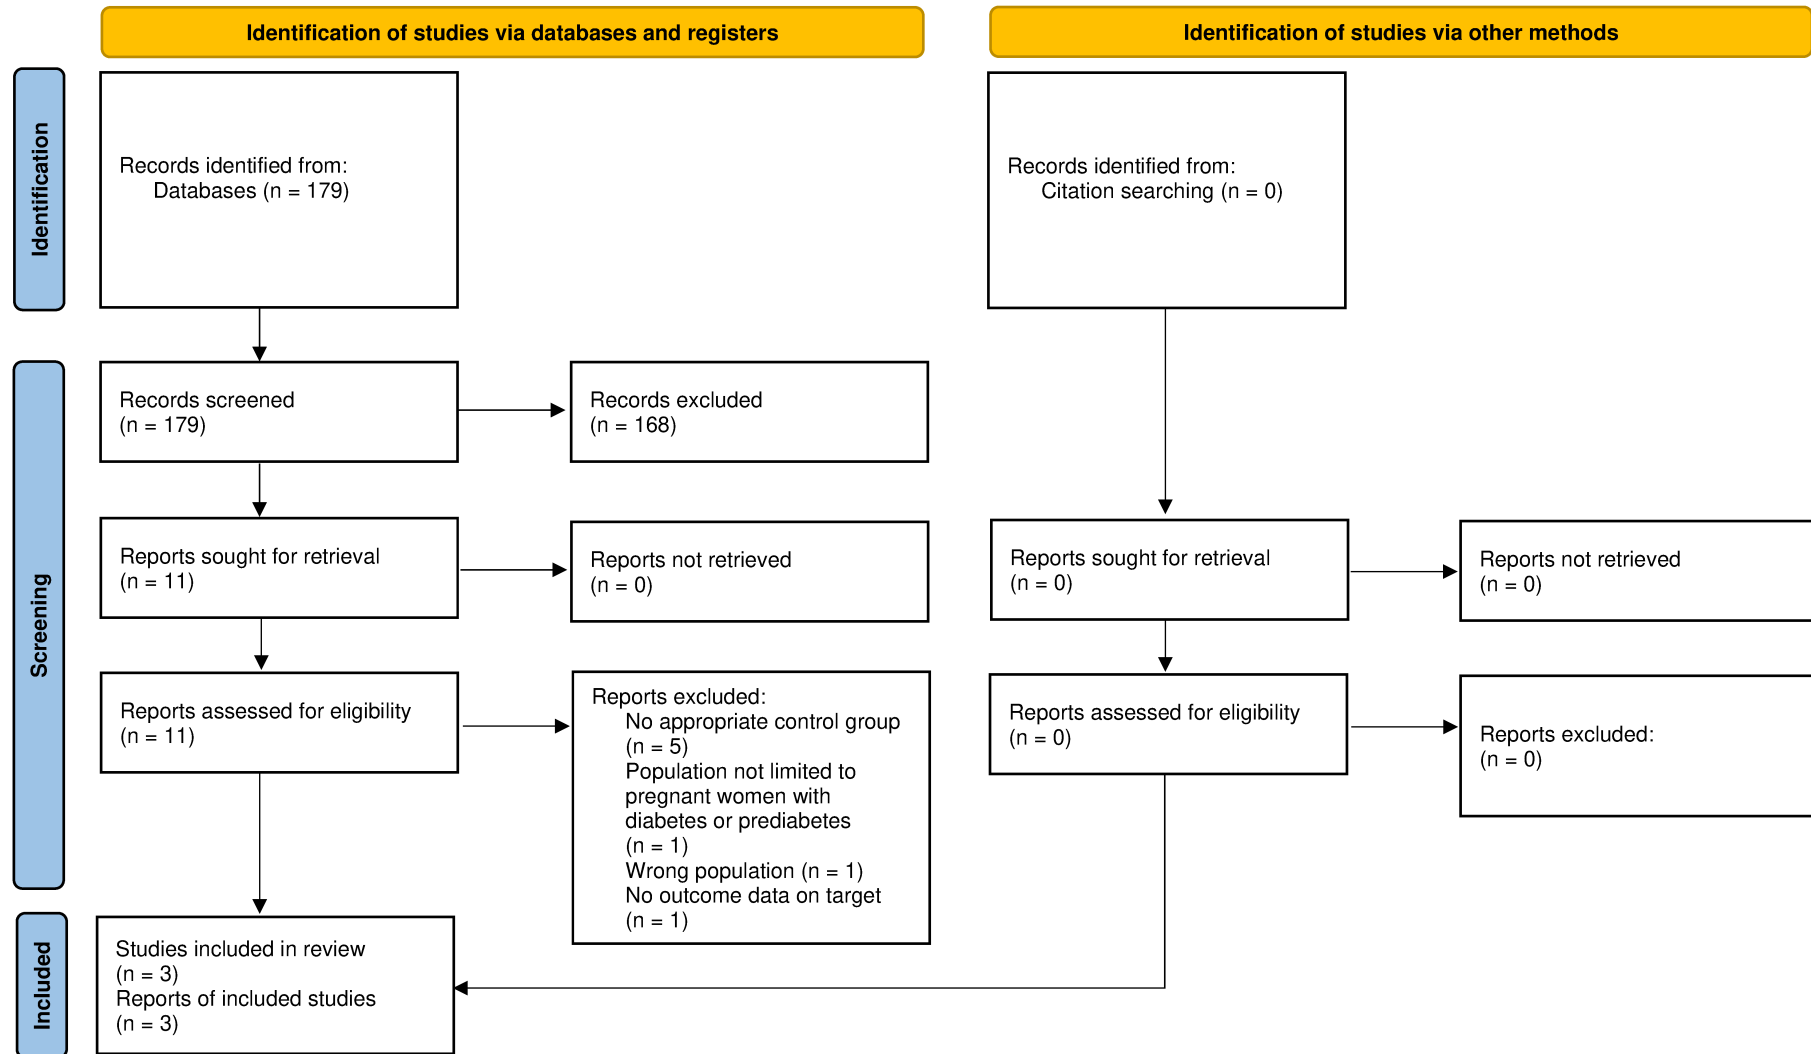

Figure 2: Flow diagram of search results and study selection for women undergoing elective Cesarean section in late preterm period

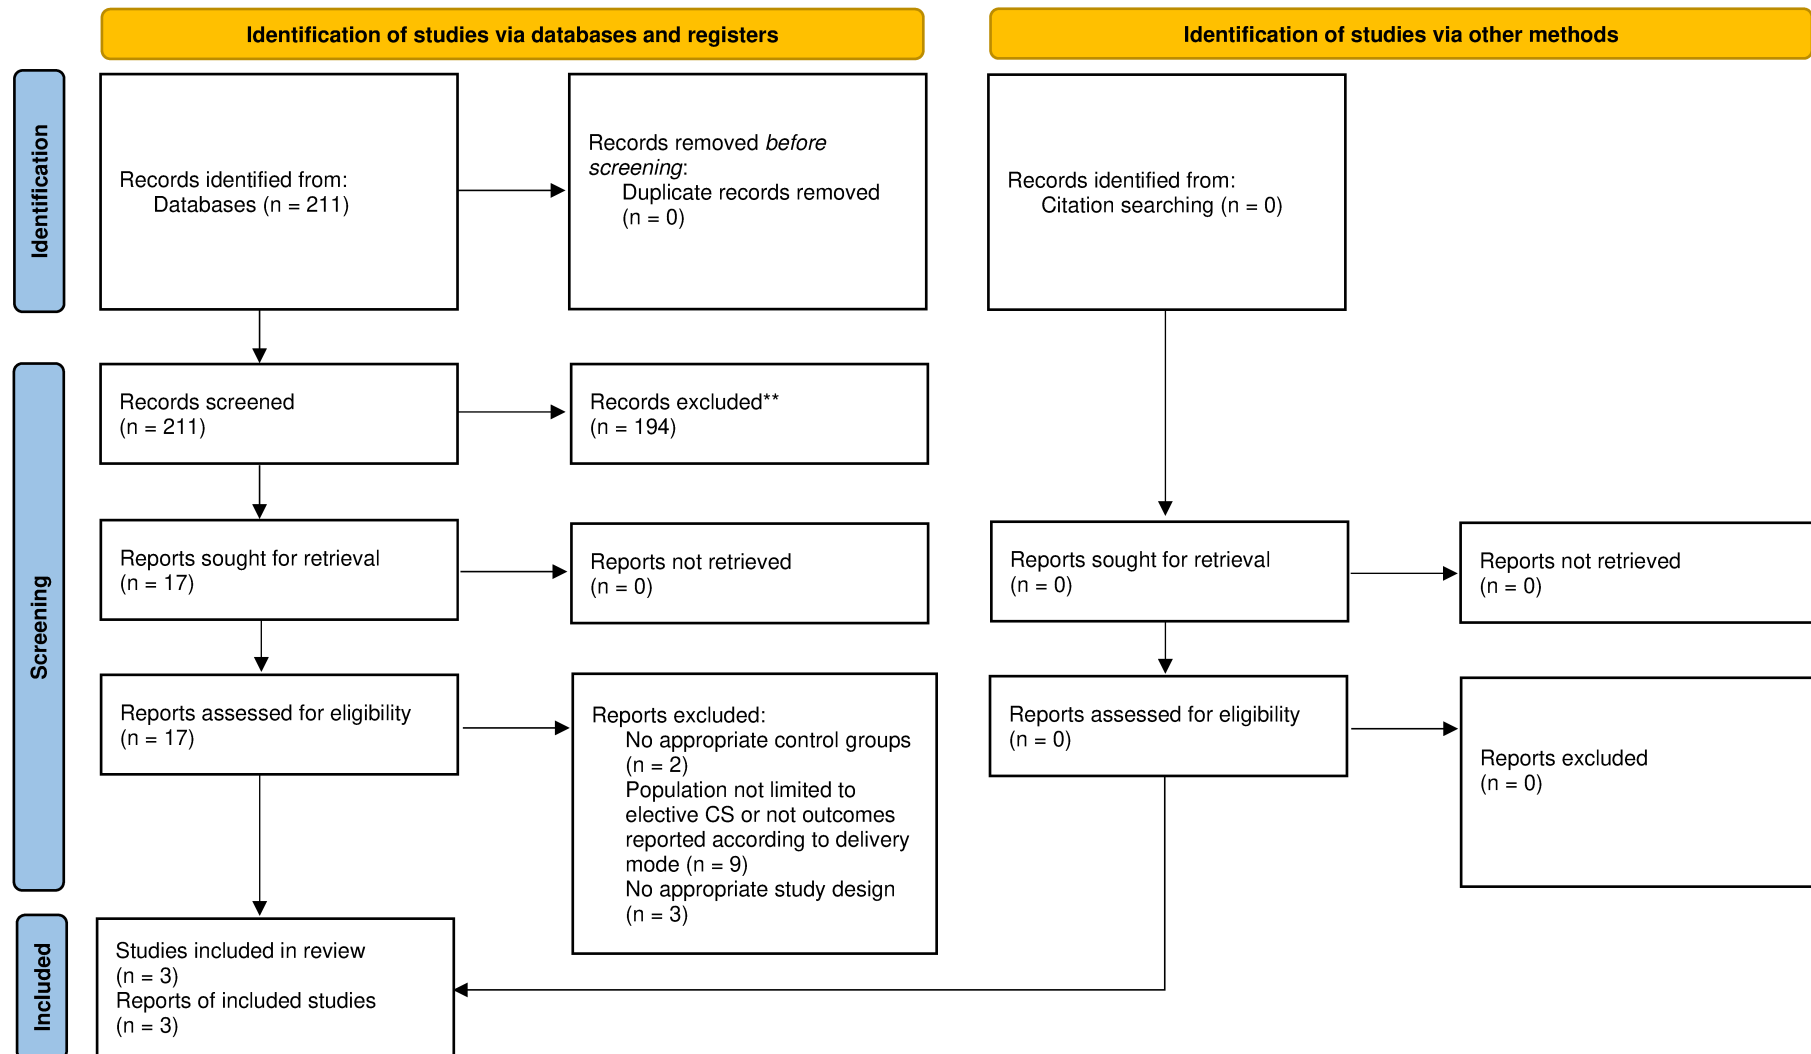

Figure 3: Flow diagram of search results and study selection for women with chorioamnionitis (histological or clinical)

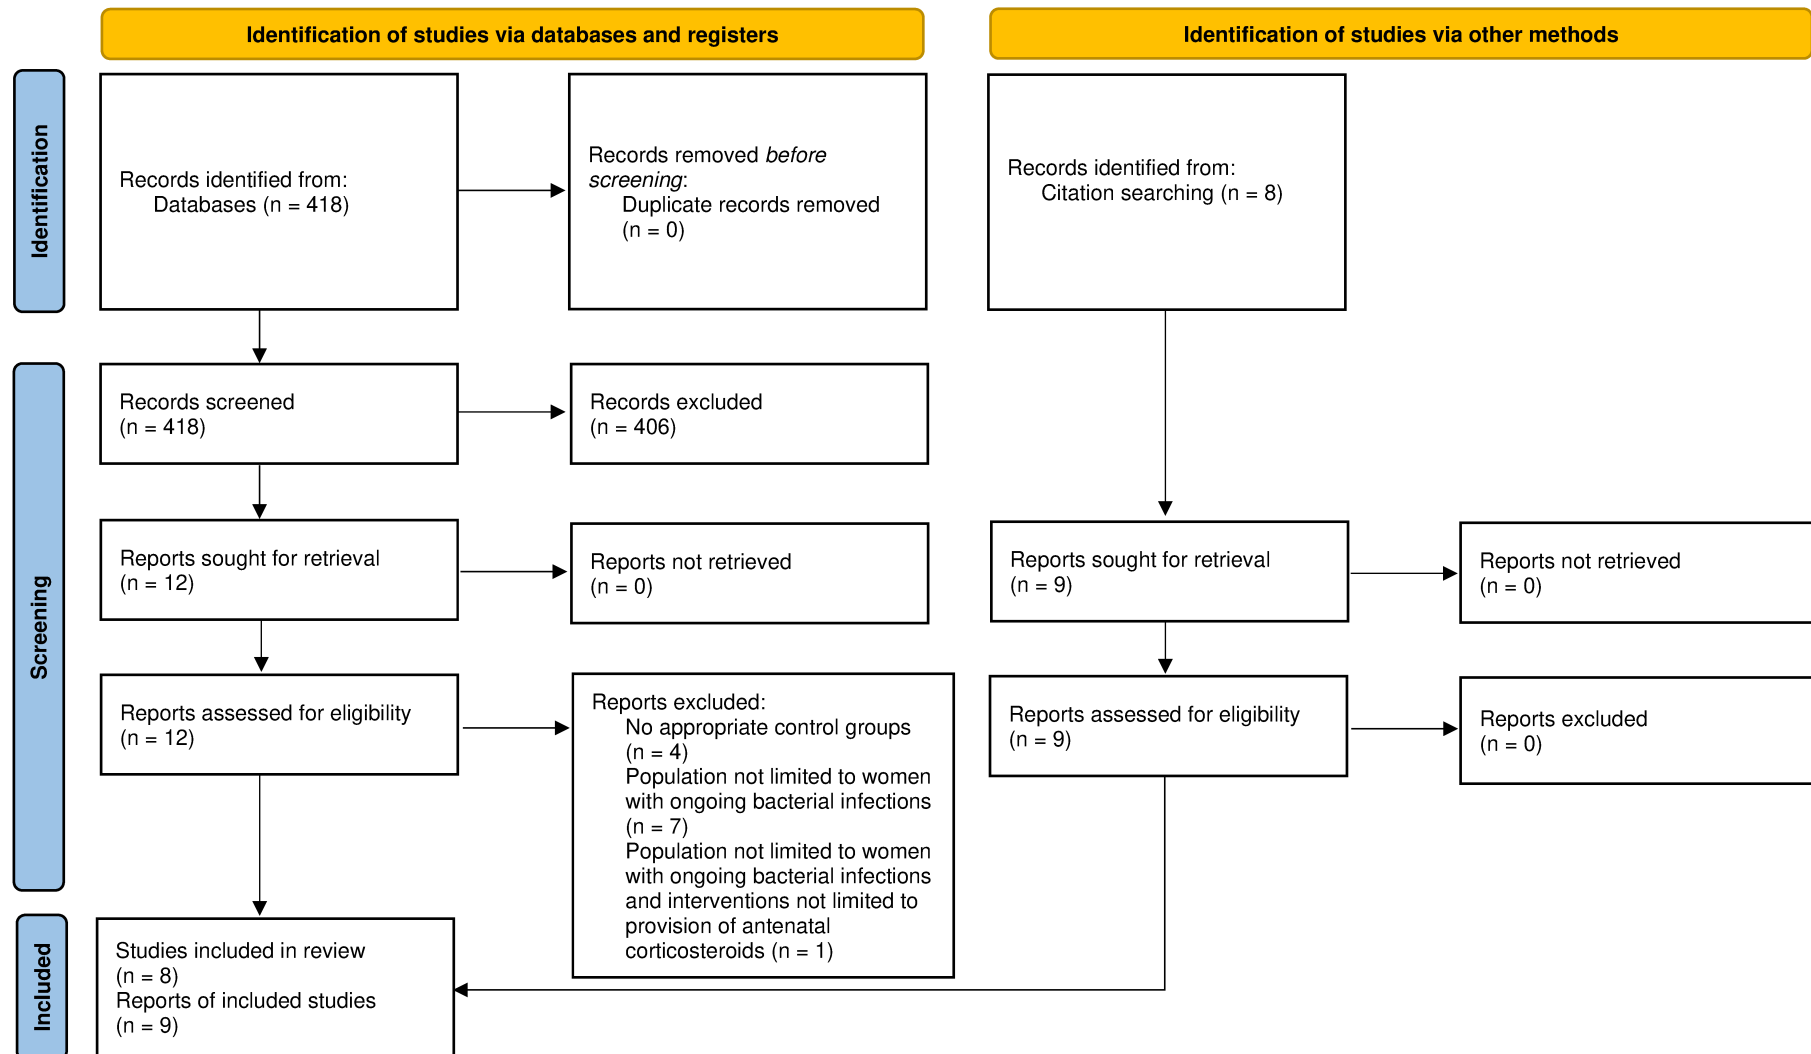

Figure 4: Flow diagram of search results and study selection for women with growth-restricted fetuses and/or small-for-gestational-age infants

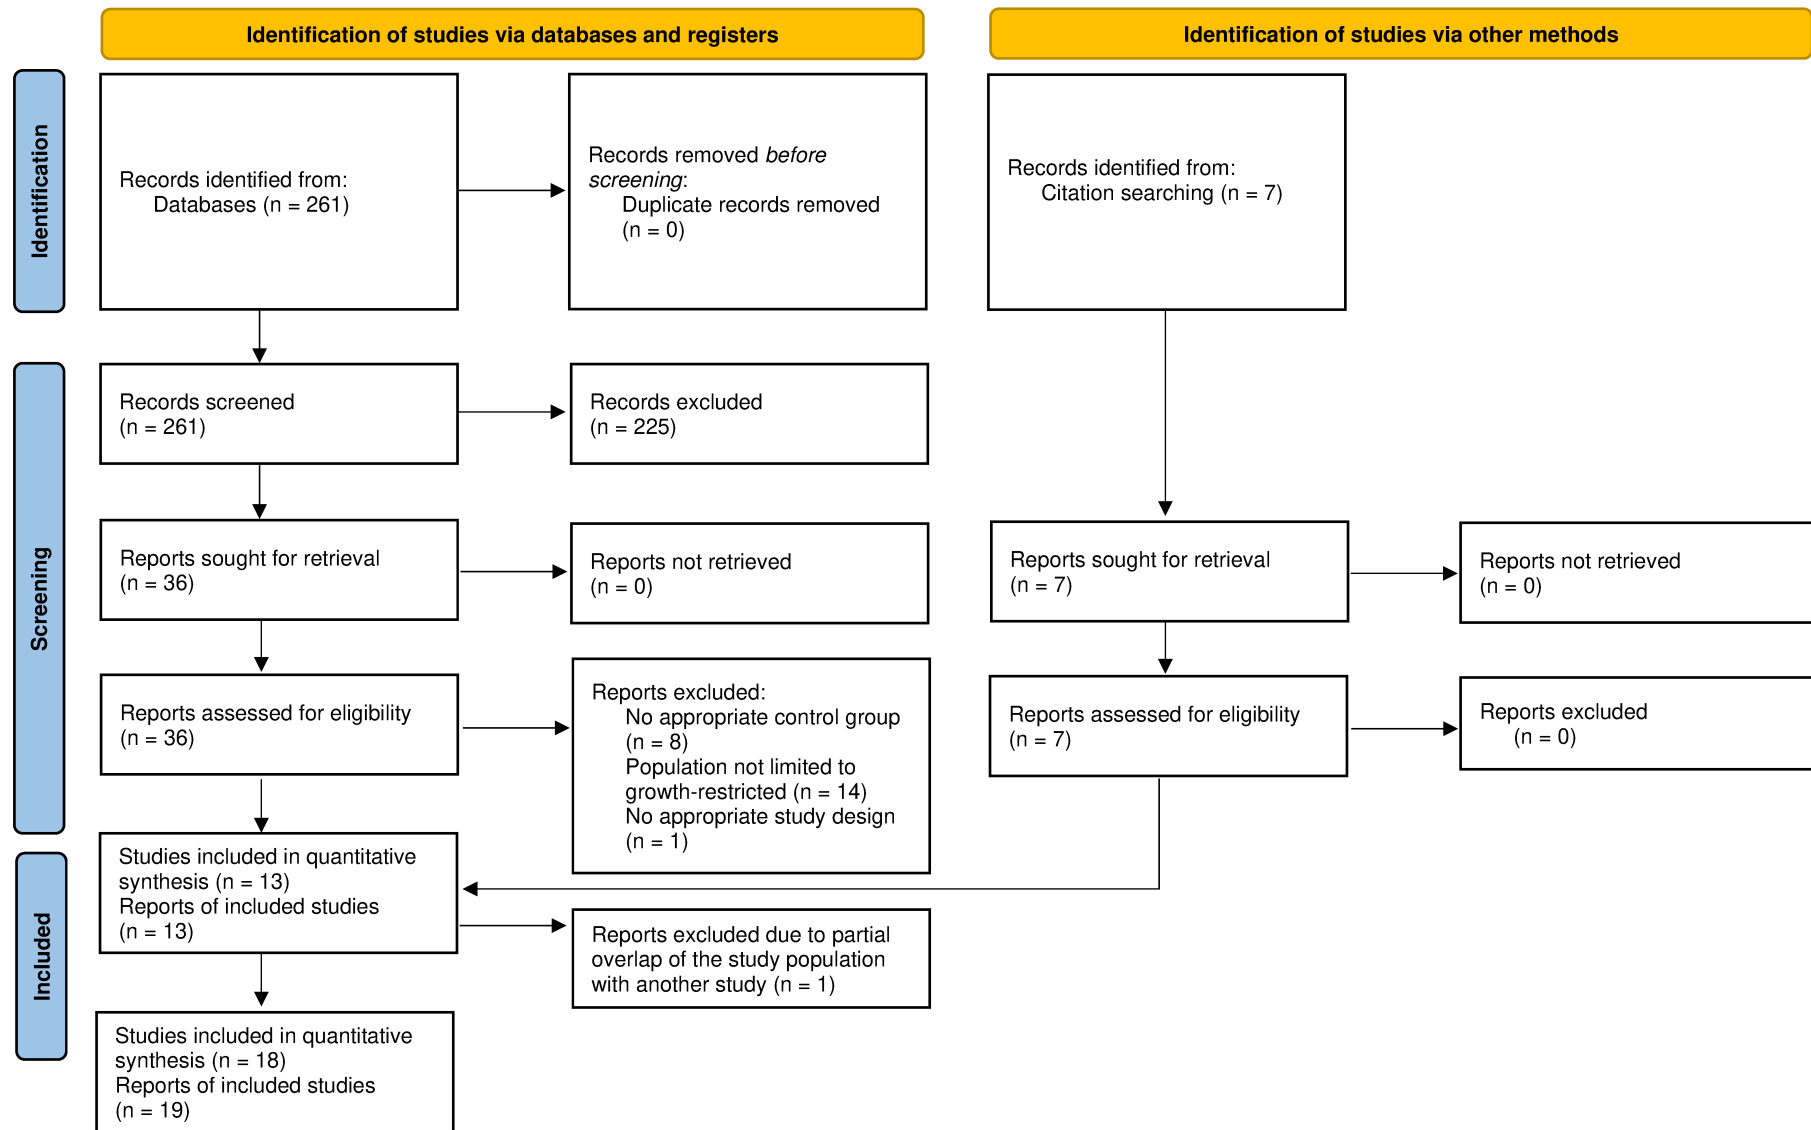

Supplement: bmjopen-2022-065070supp002.pdf [file bmjopen-2022-065070supp002.pdf]
