# Supplementary material for: Antenatal corticosteroids in specific groups at risk of preterm birth: a systematic review
Source: PubMed Central journal article supplement — BMJ Open. 2023 Sep 22;13(9):e065070. doi: 10.1136/bmjopen-2022-065070 (PMC10533784; doi:10.1136/bmjopen-2022-065070), 2023-09-22
Supplement: bmjopen-2022-065070supp003.pdf [file bmjopen-2022-065070supp003.pdf]

## Supplementary file 3: Risk of bias figures

Figure 1: Summary of risk of bias for each trial for women with pregestational and/or gestational diabetes  
Green = low risk of bias; red = high risk of bias; yellow = unclear risk of bias

|                 | Selection of participants (selection bias) | Confounding variables (selection bias) | Measurement of exposure (performance bias) | Blinding of outcomes assessment (Detection bias) | Incomplete outcome data (attrition bias) | Selective outcome reporting (reporting bias) |
|-----------------|--------------------------------------------|----------------------------------------|--------------------------------------------|--------------------------------------------------|------------------------------------------|----------------------------------------------|
| Battarbee 2020  | +                                          | -                                      | +                                          | +                                                | +                                        | +                                            |
| Cassimatis 2020 | +                                          | -                                      | +                                          | +                                                | +                                        | +                                            |
| Krispin 2018    | +                                          | -                                      | +                                          | +                                                | +                                        | +                                            |

Figure 2: Summary of risk of bias for each trial for women undergoing elective Cesarean section in late preterm period  
 Green = low risk of bias; red = high risk of bias; yellow = unclear risk of bias

|                         | Selection of participants (selection bias) | Confounding variables (selection bias) | Measurement of exposure (performance bias) | Blinding of outcomes assessment (Detection bias) | Incomplete outcome data (attrition bias) | Selective outcome reporting (reporting bias) |
|-------------------------|--------------------------------------------|----------------------------------------|--------------------------------------------|--------------------------------------------------|------------------------------------------|----------------------------------------------|
| de la Huerga Lopez 2019 | +                                          | +                                      | +                                          | +                                                | +                                        | +                                            |
| Kirshenbaum 2018        | +                                          | +                                      | +                                          | +                                                | +                                        | +                                            |

|                       | Random sequence generation (selection bias) | Allocation concealment (selection bias) | Blinding of participants and personnel (performance bias) | Blinding of outcome assessment (detection bias) | Incomplete outcome data (attrition bias) | Selective reporting (reporting bias) | Other bias |
|-----------------------|---------------------------------------------|-----------------------------------------|-----------------------------------------------------------|-------------------------------------------------|------------------------------------------|--------------------------------------|------------|
| Gyamfi-Bannerman 2016 | +                                           | +                                       | +                                                         | +                                               | +                                        | +                                    | +          |

Figure 3: Summary of risk of bias for each trial for women with chorioamnionitis (histological or clinical)  
 Green = low risk of bias; red = high risk of bias; yellow = unclear risk of bias

|                    | Selection of participants (selection bias) | Confounding variables (selection bias) | Measurement of exposure (performance bias) | Blinding of outcomes assessment (Detection bias) | Incomplete outcome data (attrition bias) | Selective outcome reporting (reporting bias) |
|--------------------|--------------------------------------------|----------------------------------------|--------------------------------------------|--------------------------------------------------|------------------------------------------|----------------------------------------------|
| Ahn 2012           | +                                          | -                                      | +                                          | +                                                | +                                        | +                                            |
| Baud 2000          | +                                          | -                                      | +                                          | +                                                | +                                        | +                                            |
| Been 2009          | +                                          | -                                      | +                                          | +                                                | +                                        | +                                            |
| Dempsey 2005       | +                                          | -                                      | +                                          | +                                                | +                                        | +                                            |
| Elimian 2000       | +                                          | -                                      | +                                          | +                                                | +                                        | +                                            |
| Foix-L'Helias 2005 | +                                          | -                                      | +                                          | +                                                | +                                        | +                                            |
| Goldenberg 2006    | +                                          | -                                      | +                                          | +                                                | +                                        | +                                            |
| Ryu 2019           | +                                          | -                                      | +                                          | +                                                | +                                        | +                                            |

Figure 4: Summary of risk of bias for each trial for women with growth-restricted fetuses and/or small-for-gestational-age infants  
Green = low risk of bias; red = high risk of bias; yellow = unclear risk of bias

|                     | Selection of participants (selection bias) | Confounding variables (selection bias) | Measurement of exposure (performance bias) | Blinding of outcomes assessment (Detection bias) | Incomplete outcome data (attrition bias) | Selective outcome reporting (reporting bias) |
|---------------------|--------------------------------------------|----------------------------------------|--------------------------------------------|--------------------------------------------------|------------------------------------------|----------------------------------------------|
| Bernstein 2000      | +                                          | -                                      | +                                          | +                                                | +                                        | +                                            |
| Bitar 2020          | +                                          | -                                      | +                                          | +                                                | +                                        | +                                            |
| Cartwright 2019     | +                                          | -                                      | +                                          | +                                                | +                                        | +                                            |
| DiLenardo 1990      | ?                                          | -                                      | +                                          | +                                                | +                                        | +                                            |
| Elimian 1999        | +                                          | -                                      | +                                          | +                                                | +                                        | +                                            |
| Feng 2017           | +                                          | -                                      | +                                          | +                                                | +                                        | +                                            |
| Foix-L'Helias 2005  | +                                          | -                                      | +                                          | +                                                | +                                        | +                                            |
| Ishikawa 2015       | +                                          | -                                      | +                                          | +                                                | +                                        | +                                            |
| Kim 2018            | +                                          | +                                      | +                                          | +                                                | +                                        | +                                            |
| Kim Y.J. 2018       | +                                          | -                                      | +                                          | +                                                | +                                        | +                                            |
| Ley 1997            | +                                          | -                                      | +                                          | +                                                | +                                        | +                                            |
| Mitsiakos 2013      | +                                          | -                                      | +                                          | +                                                | +                                        | +                                            |
| Riskin-Mashiah 2016 | +                                          | -                                      | +                                          | +                                                | +                                        | +                                            |
| Riskin-Mashiah 2018 | +                                          | -                                      | +                                          | +                                                | +                                        | +                                            |
| Schaap 2001         | +                                          | -                                      | +                                          | +                                                | +                                        | +                                            |
| Spinillo 1995       | +                                          | -                                      | +                                          | +                                                | +                                        | +                                            |
| Torrance 2007       | +                                          | -                                      | +                                          | +                                                | +                                        | +                                            |
| vanStralen 2009     | +                                          | -                                      | +                                          | +                                                | +                                        | +                                            |
