# Supplementary material for: Antenatal corticosteroids in specific groups at risk of preterm birth: a systematic review
Source: PubMed Central journal article supplement — BMJ Open. 2023 Sep 22;13(9):e065070. doi: 10.1136/bmjopen-2022-065070 (PMC10533784; doi:10.1136/bmjopen-2022-065070), 2023-09-22
Supplement: bmjopen-2022-065070supp004.pdf [file bmjopen-2022-065070supp004.pdf]

**Supplementary file 4: Forest plots**

Maternal outcomes for women with pregestational and/or gestational diabetes mellitus

1) Caesarean section

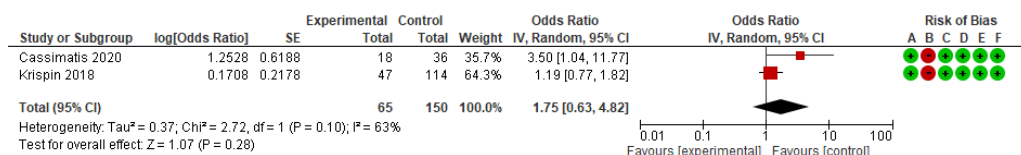

Risk of bias legend

- (A) Selection of participants (selection bias)
- (B) Confounding variables (selection bias)
- (C) Measurement of exposure (performance bias)
- (D) Blinding of outcomes assessment (Detection bias)
- (E) Incomplete outcome data (attrition bias)
- (F) Selective outcome reporting (reporting bias)

SE: Standard error; CI: Confidence interval

Neonatal outcomes for women with pregestational and/or gestational diabetes mellitus

1) Neonatal death within 48 h of birth

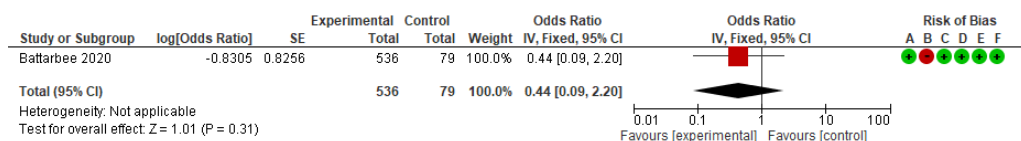

Risk of bias legend

- (A) Selection of participants (selection bias)
- (B) Confounding variables (selection bias)
- (C) Measurement of exposure (performance bias)
- (D) Blinding of outcomes assessment (Detection bias)
- (E) Incomplete outcome data (attrition bias)
- (F) Selective outcome reporting (reporting bias)

SE: Standard error; CI: Confidence interval

2) Apgar score < 7 at 5 min

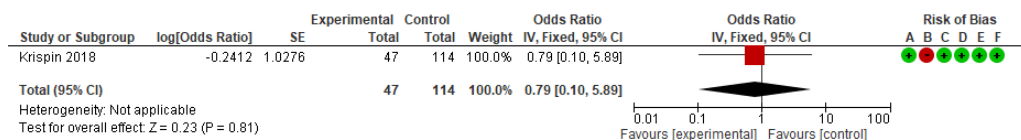

Risk of bias legend

- (A) Selection of participants (selection bias)
- (B) Confounding variables (selection bias)
- (C) Measurement of exposure (performance bias)
- (D) Blinding of outcomes assessment (Detection bias)
- (E) Incomplete outcome data (attrition bias)
- (F) Selective outcome reporting (reporting bias)

SE: Standard error; CI: Confidence interval

## 3) Respiratory distress syndrome (RDS)

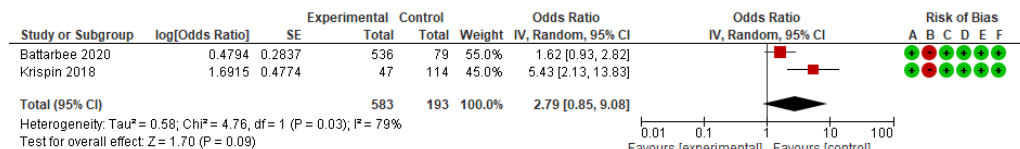Risk of bias legend

- (A) Selection of participants (selection bias)
- (B) Confounding variables (selection bias)
- (C) Measurement of exposure (performance bias)
- (D) Blinding of outcomes assessment (Detection bias)
- (E) Incomplete outcome data (attrition bias)
- (F) Selective outcome reporting (reporting bias)

SE: Standard error; CI: Confidence interval

## 4) Neonatal hypoglycemia

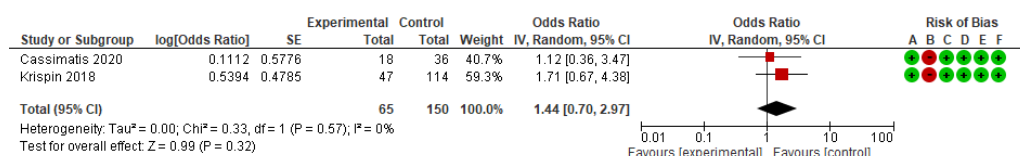Risk of bias legend

- (A) Selection of participants (selection bias)
- (B) Confounding variables (selection bias)
- (C) Measurement of exposure (performance bias)
- (D) Blinding of outcomes assessment (Detection bias)
- (E) Incomplete outcome data (attrition bias)
- (F) Selective outcome reporting (reporting bias)

SE: Standard error; CI: Confidence interval

## 5) Admission to neonatal intensive care unit (NICU)

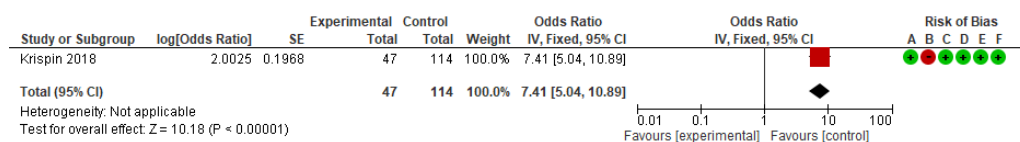Risk of bias legend

- (A) Selection of participants (selection bias)
- (B) Confounding variables (selection bias)
- (C) Measurement of exposure (performance bias)
- (D) Blinding of outcomes assessment (Detection bias)
- (E) Incomplete outcome data (attrition bias)
- (F) Selective outcome reporting (reporting bias)

SE: Standard error; CI: Confidence interval

**Maternal outcomes for women undergoing elective cesarean section in the late preterm period**

1) Hypertensive disorders

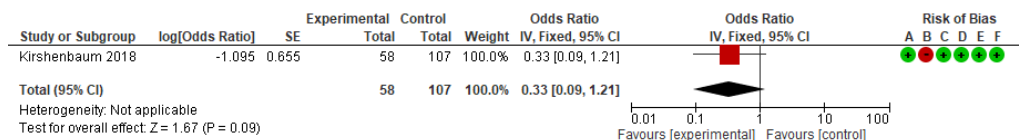

Risk of bias legend

- (A) Selection of participants (selection bias)
- (B) Confounding variables (selection bias)
- (C) Measurement of exposure (performance bias)
- (D) Blinding of outcomes assessment (Detection bias)
- (E) Incomplete outcome data (attrition bias)
- (F) Selective outcome reporting (reporting bias)

SE: Standard error; CI: Confidence interval

2) Gestational diabetes mellitus

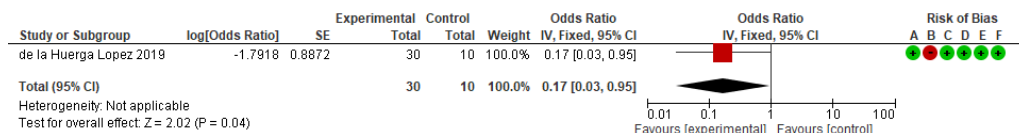

Risk of bias legend

- (A) Selection of participants (selection bias)
- (B) Confounding variables (selection bias)
- (C) Measurement of exposure (performance bias)
- (D) Blinding of outcomes assessment (Detection bias)
- (E) Incomplete outcome data (attrition bias)
- (F) Selective outcome reporting (reporting bias)

SE: Standard error; CI: Confidence interval

**Neonatal outcomes for women undergoing elective cesarean section in late preterm period**

1) Respiratory distress syndrome (RDS)

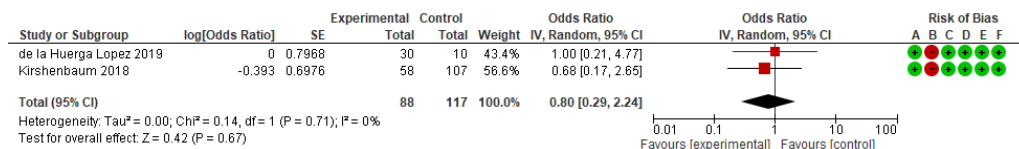

Risk of bias legend

- (A) Selection of participants (selection bias)
- (B) Confounding variables (selection bias)
- (C) Measurement of exposure (performance bias)
- (D) Blinding of outcomes assessment (Detection bias)
- (E) Incomplete outcome data (attrition bias)
- (F) Selective outcome reporting (reporting bias)

SE: Standard error; CI: Confidence interval

2) Use of mechanical ventilation

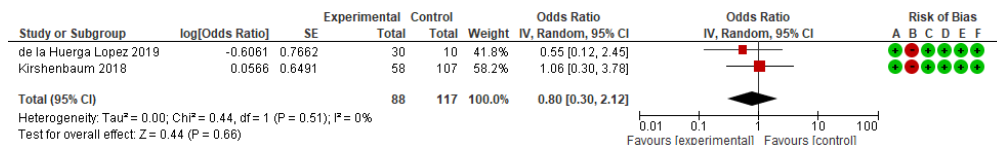

Risk of bias legend

- (A) Selection of participants (selection bias)
- (B) Confounding variables (selection bias)
- (C) Measurement of exposure (performance bias)
- (D) Blinding of outcomes assessment (Detection bias)
- (E) Incomplete outcome data (attrition bias)
- (F) Selective outcome reporting (reporting bias)

SE: Standard error; CI: Confidence interval

3) Admission to neonatal intensive care unit (NICU)

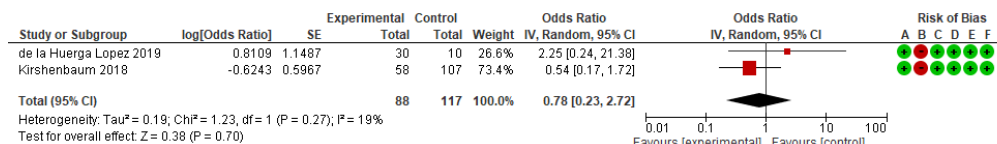

Risk of bias legend

- (A) Selection of participants (selection bias)
- (B) Confounding variables (selection bias)
- (C) Measurement of exposure (performance bias)
- (D) Blinding of outcomes assessment (Detection bias)
- (E) Incomplete outcome data (attrition bias)
- (F) Selective outcome reporting (reporting bias)

SE: Standard error; CI: Confidence interval

4) Neonatal hypoglycemia

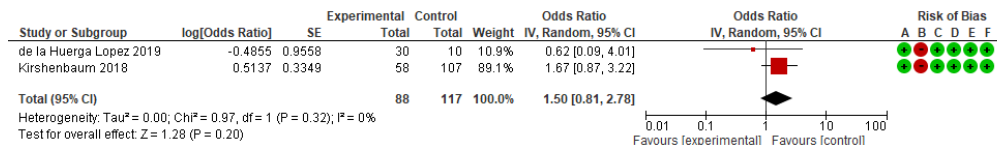

Risk of bias legend

- (A) Selection of participants (selection bias)
- (B) Confounding variables (selection bias)
- (C) Measurement of exposure (performance bias)
- (D) Blinding of outcomes assessment (Detection bias)
- (E) Incomplete outcome data (attrition bias)
- (F) Selective outcome reporting (reporting bias)

SE: Standard error; CI: Confidence interval

5) Intraventricular hemorrhage (IVH)

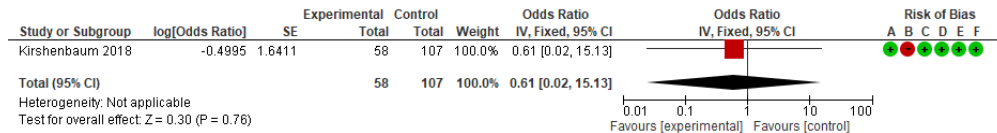

Risk of bias legend

- (A) Selection of participants (selection bias)
- (B) Confounding variables (selection bias)
- (C) Measurement of exposure (performance bias)
- (D) Blinding of outcomes assessment (Detection bias)
- (E) Incomplete outcome data (attrition bias)
- (F) Selective outcome reporting (reporting bias)

SE: Standard error; CI: Confidence interval

6) Necrotizing enterocolitis (NEC)

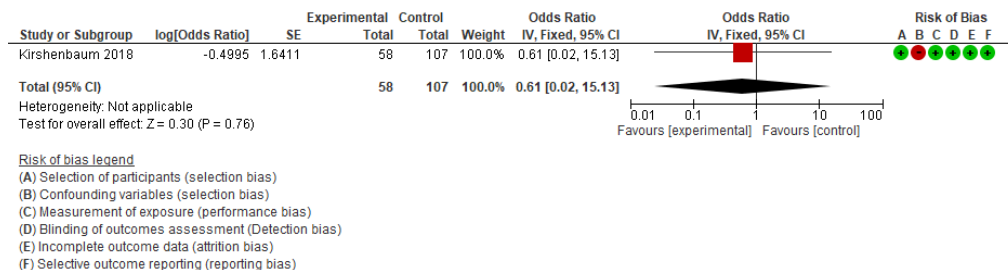

SE: Standard error; CI: Confidence interval

7) Apgar score ≤ 7 at 5min

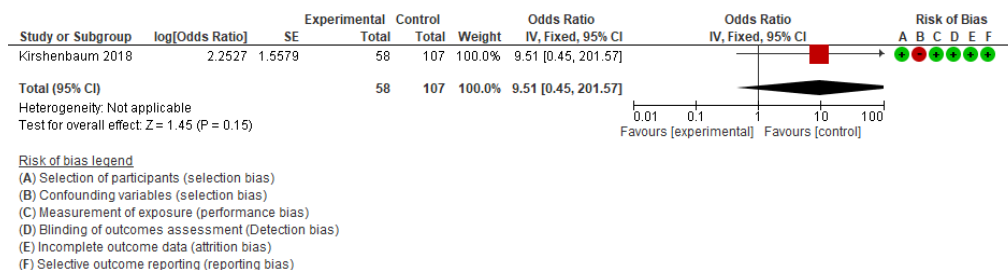

SE: Standard error; CI: Confidence interval

8) Mean duration of mechanical ventilation, days

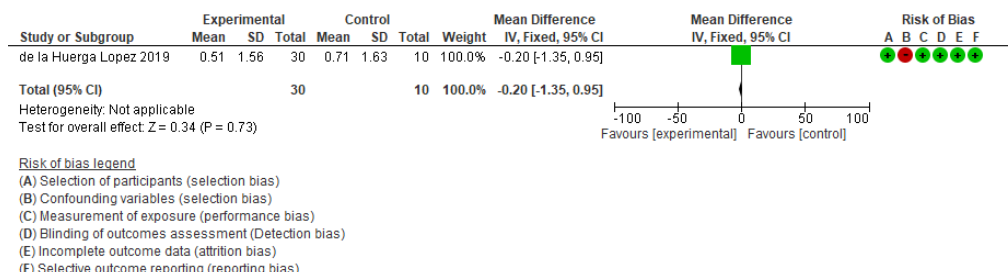

SE: Standard error; CI: Confidence interval

9) Oxygen requirement for at least 4 hours

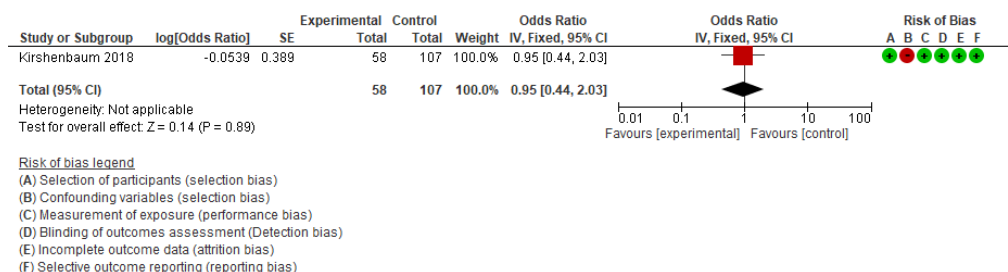

SE: Standard error; CI: Confidence interval

Maternal outcomes for women with histological chorioamnionitis

\*There is no maternal outcome in clinical chorioamnionitis.

1) Caesarean section (HC)

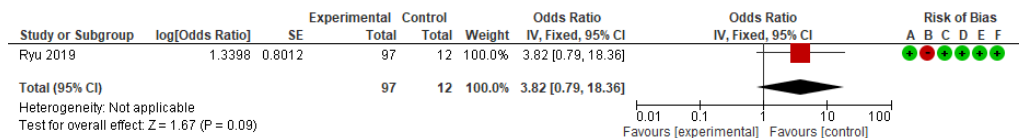

Risk of bias legend  
 (A) Selection of participants (selection bias)  
 (B) Confounding variables (selection bias)  
 (C) Measurement of exposure (performance bias)  
 (D) Blinding of outcomes assessment (Detection bias)  
 (E) Incomplete outcome data (attrition bias)  
 (F) Selective outcome reporting (reporting bias)

SE: Standard error; CI: Confidence interval; HC: Histological chorioamnionitis

2) Gestational diabetes mellitus (HC)

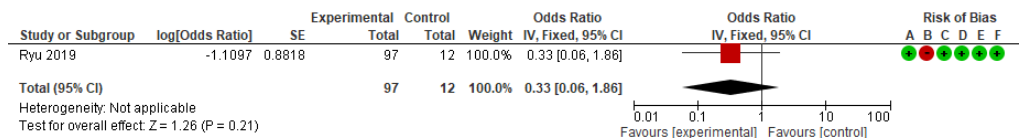

Risk of bias legend  
 (A) Selection of participants (selection bias)  
 (B) Confounding variables (selection bias)  
 (C) Measurement of exposure (performance bias)  
 (D) Blinding of outcomes assessment (Detection bias)  
 (E) Incomplete outcome data (attrition bias)  
 (F) Selective outcome reporting (reporting bias)

SE: Standard error; CI: Confidence interval; HC: Histological chorioamnionitis

3) Preeclampsia or eclampsia (HC)

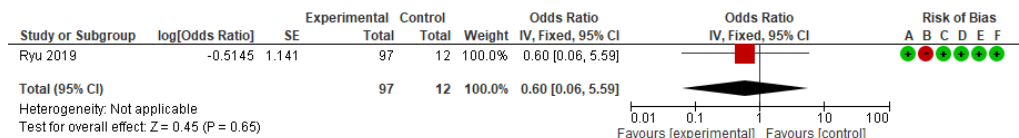

Risk of bias legend  
 (A) Selection of participants (selection bias)  
 (B) Confounding variables (selection bias)  
 (C) Measurement of exposure (performance bias)  
 (D) Blinding of outcomes assessment (Detection bias)  
 (E) Incomplete outcome data (attrition bias)  
 (F) Selective outcome reporting (reporting bias)

SE: Standard error; CI: Confidence interval; HC: Histological chorioamnionitis

Neonatal outcomes for women with histological chorioamnionitis (HC) and clinical chorioamnionitis (CC)

1) Neonatal death

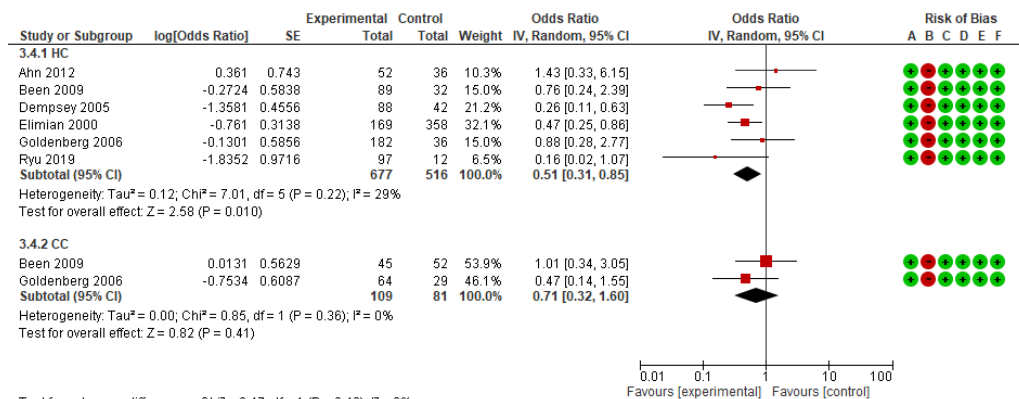

SE: Standard error; CI: Confidence interval; HC: Histological chorioamnionitis; CC: Clinical chorioamnionitis

2) Death before discharge home (CC)

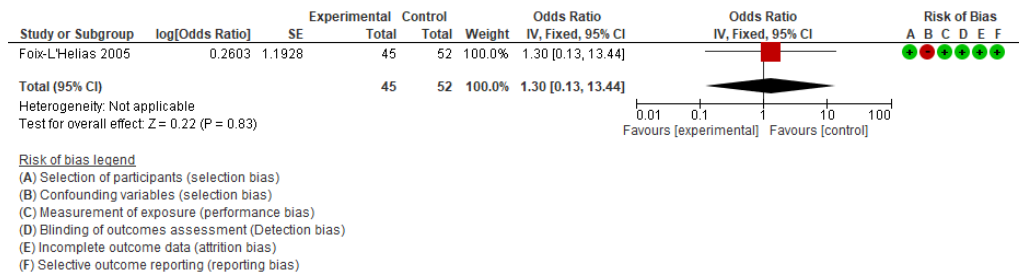

SE: Standard error; CI: Confidence interval; CC: Clinical chorioamnionitis

3) Respiratory distress syndrome (RDS)

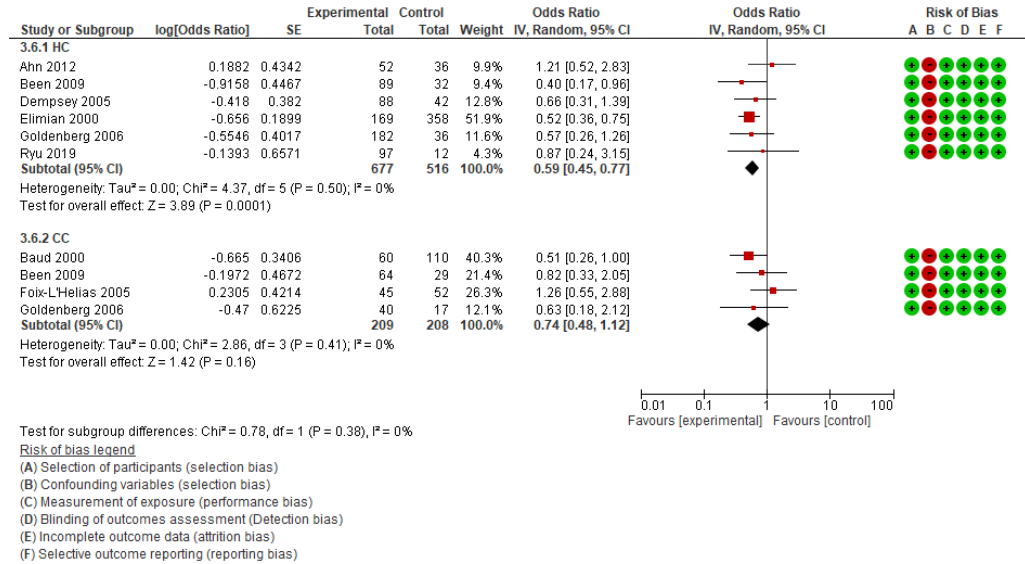

SE: Standard error; CI: Confidence interval; HC: Histological chorioamnionitis; CC: Clinical chorioamnionitis

4) Surfactant use (HC)

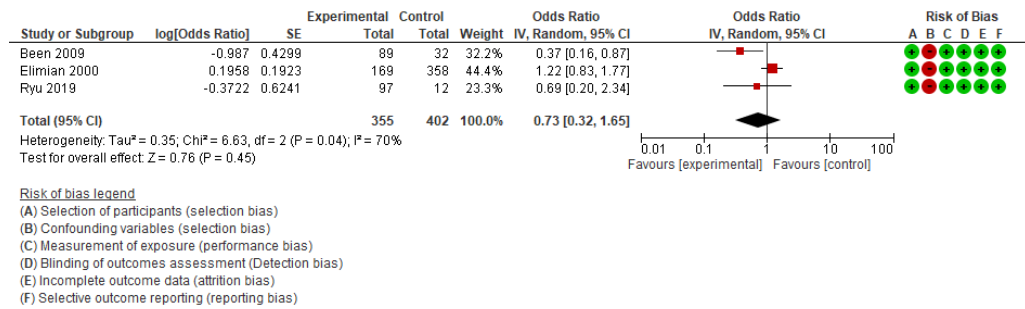

SE: Standard error; CI: Confidence interval; HC: Histological chorioamnionitis



5) Severe intraventricular hemorrhage (IVH)

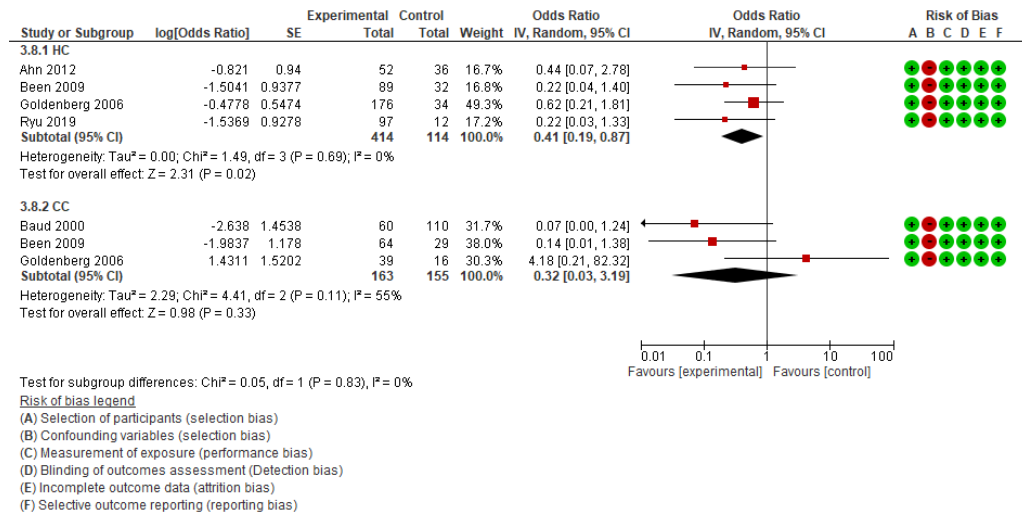

SE: Standard error; CI: Confidence interval; HC: Histological chorioamnionitis; CC: Clinical chorioamnionitis

6) Intraventricular hemorrhage (IVH)

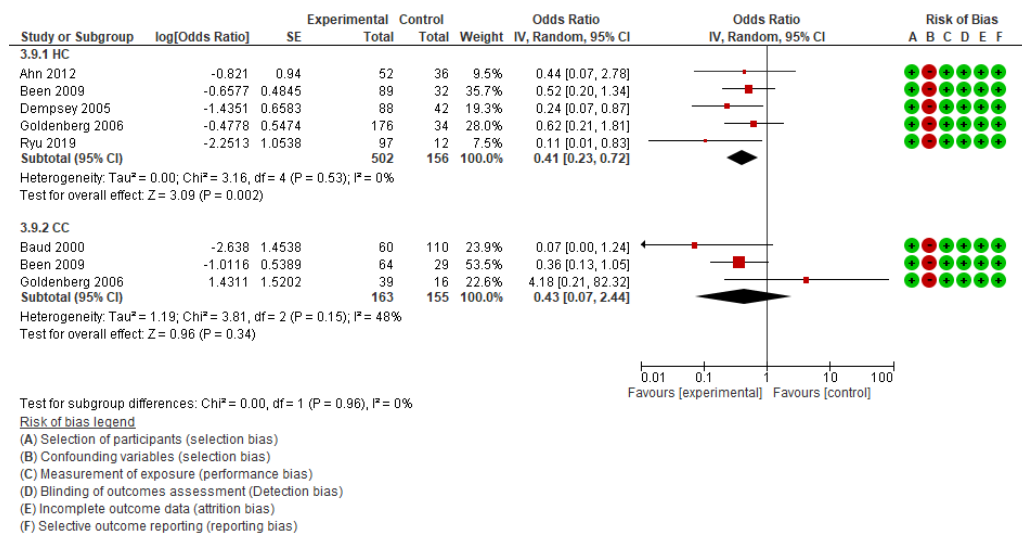

SE: Standard error; CI: Confidence interval; HC: Histological chorioamnionitis; CC: Clinical chorioamnionitis

7) Early-onset sepsis

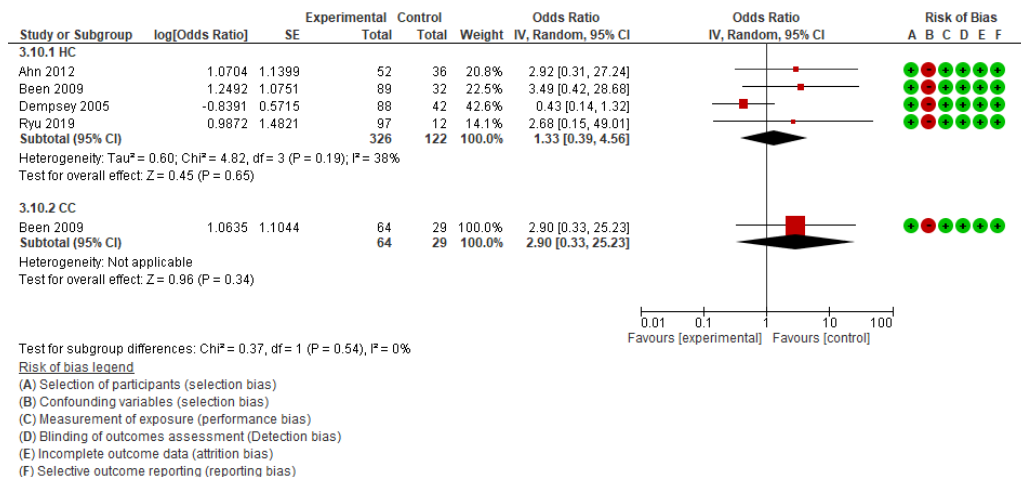

SE: Standard error; CI: Confidence interval; HC: Histological chorioamnionitis; CC: Clinical chorioamnionitis

8) Sepsis

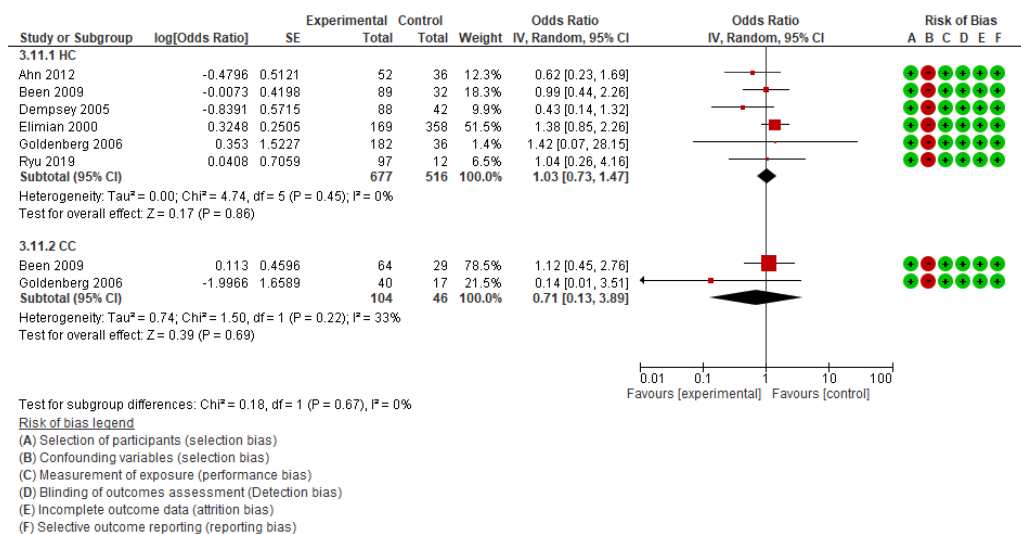

SE: Standard error; CI: Confidence interval; HC: Histological chorioamnionitis; CC: Clinical chorioamnionitis

9) Patent ductus arteriosus (PDA)

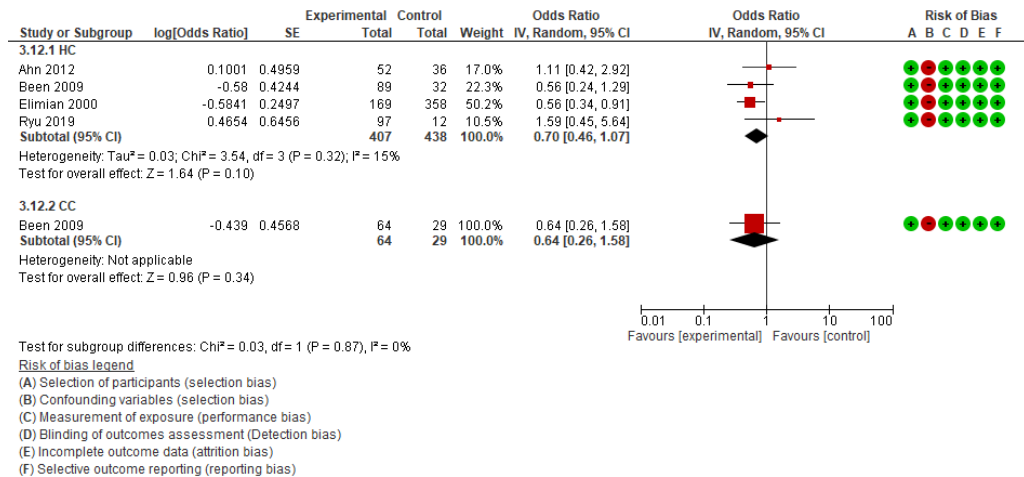

SE: Standard error; CI: Confidence interval; HC: Histological chorioamnionitis; CC: Clinical chorioamnionitis

10) Bronchopulmonary dysplasia (BPD)/ Chronic lung disease (CLD)

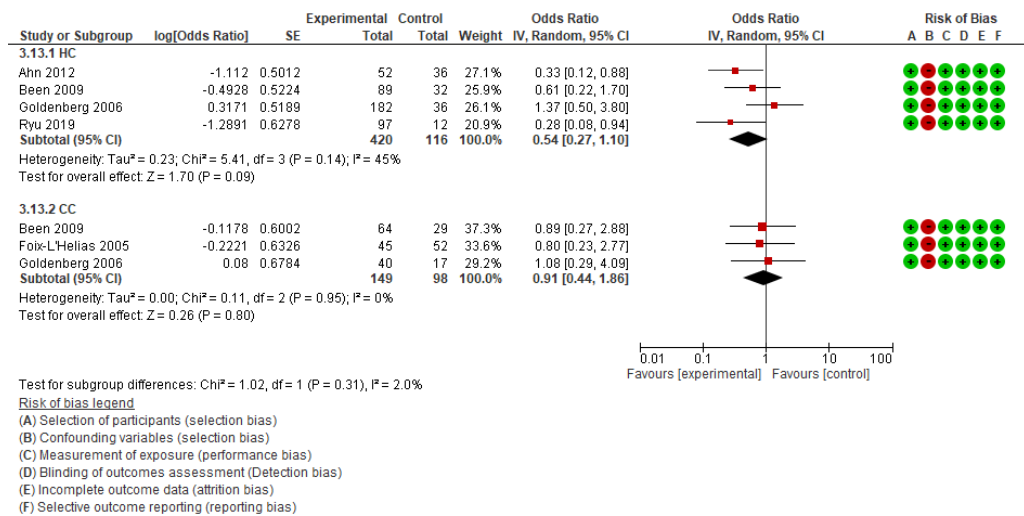

SE: Standard error; CI: Confidence interval; HC: Histological chorioamnionitis; CC: Clinical chorioamnionitis

11) Periventricular leukomalacia (PVL)

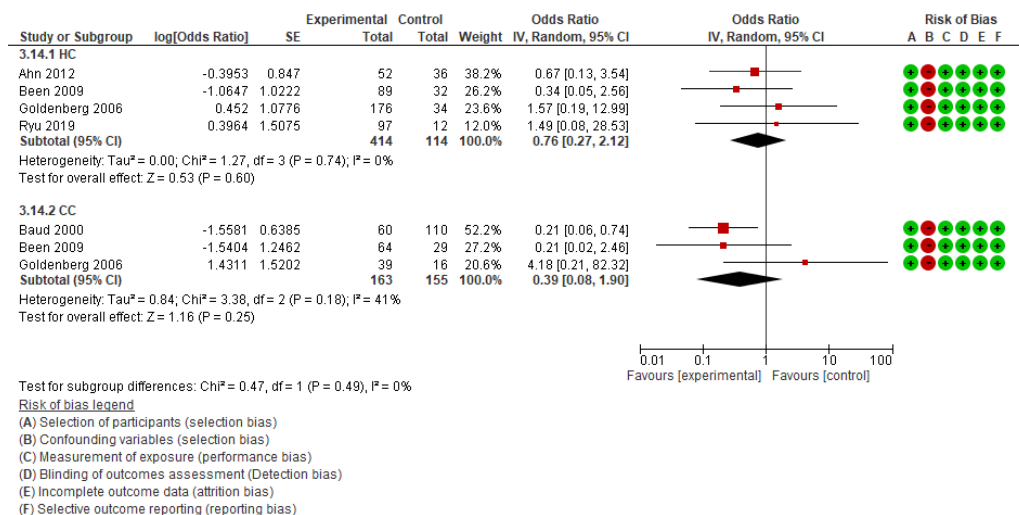

SE: Standard error; CI: Confidence interval; HC: Histological chorioamnionitis; CC: Clinical chorioamnionitis

12) Mean duration of mechanical ventilation, days (HC)

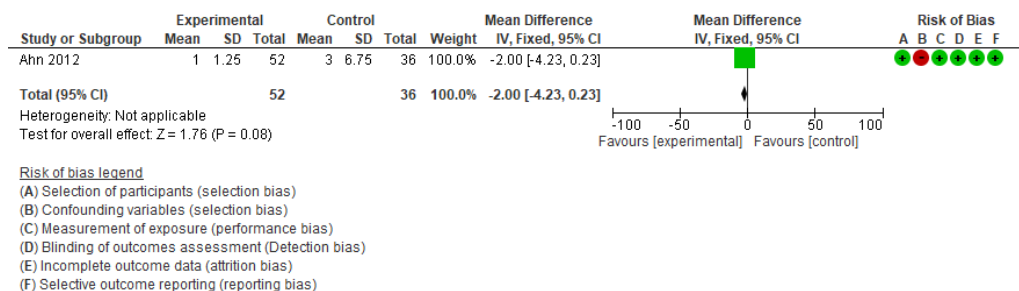

SE: Standard error; CI: Confidence interval; HC: Histological chorioamnionitis

13) Necrotizing enterocolitis (NEC)

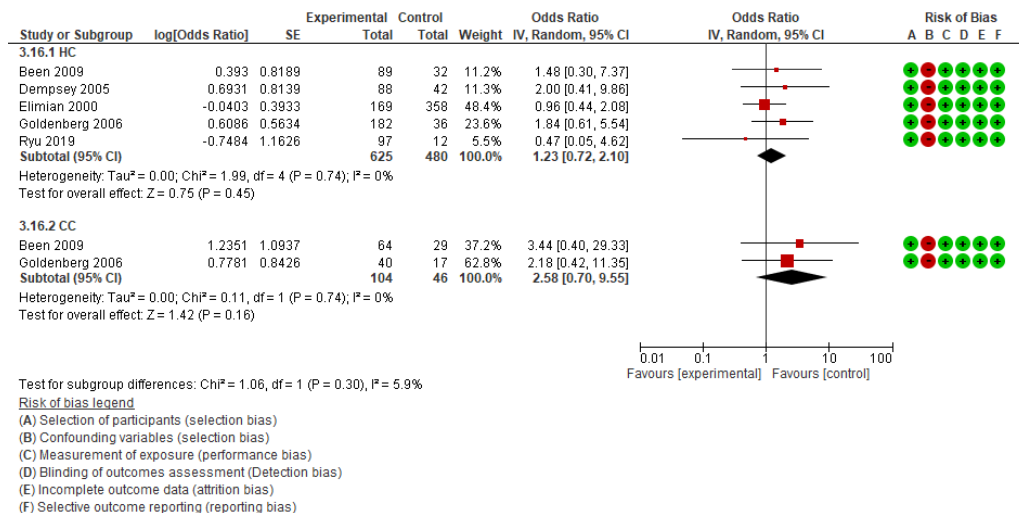

SE: Standard error; CI: Confidence interval; HC: Histological chorioamnionitis; CC: Clinical chorioamnionitis

14) Apgar score < 7 at 5 minutes (HC)

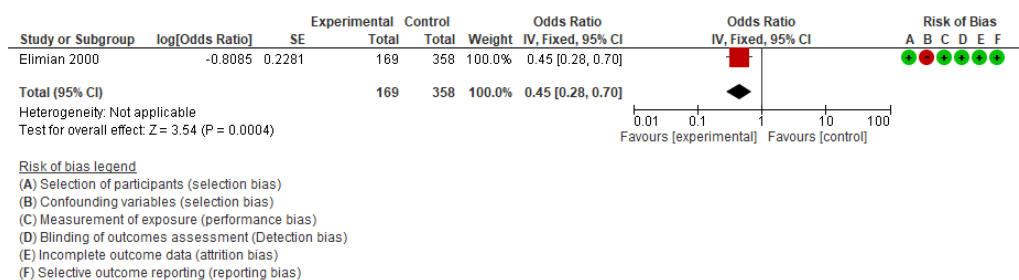

SE: Standard error; CI: Confidence interval; HC: Histological chorioamnionitis

15) Use of mechanical ventilation

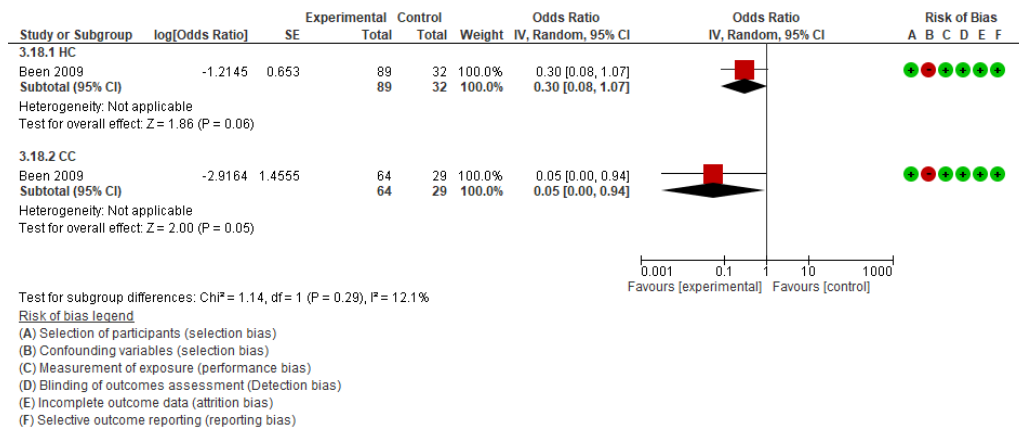

SE: Standard error; CI: Confidence interval; HC: Histological chorioamnionitis; CC: Clinical chorioamnionitis

16) Duration of oxygen use, days (HC)

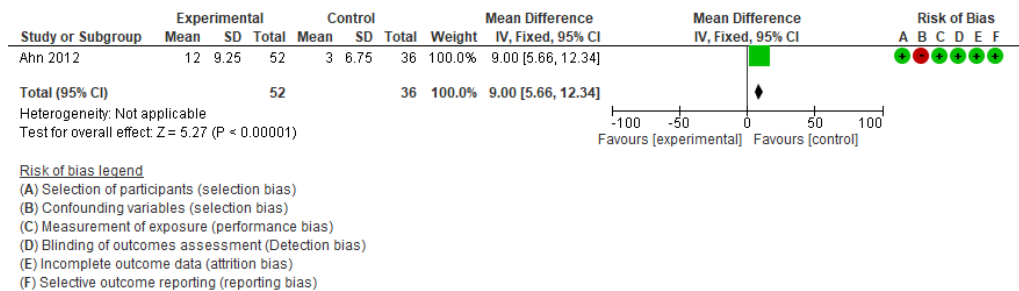

SE: Standard error; CI: Confidence interval; HC: Histological chorioamnionitis

17) Hypotension within 7 postnatal days (HC)

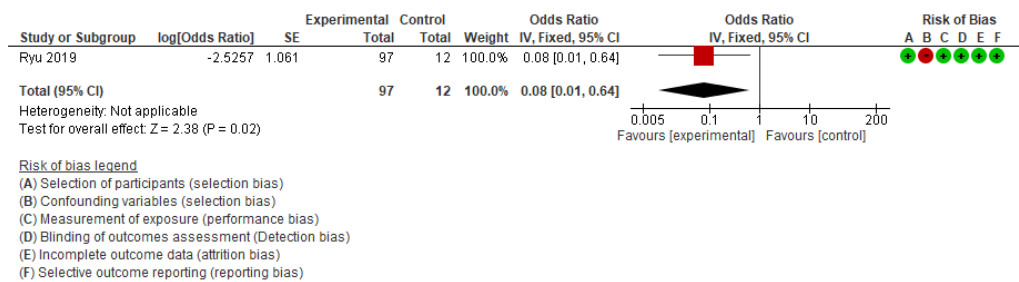

SE: Standard error; CI: Confidence interval; HC: Histological chorioamnionitis

18) Retinopathy of prematurity requiring treatment (HC)

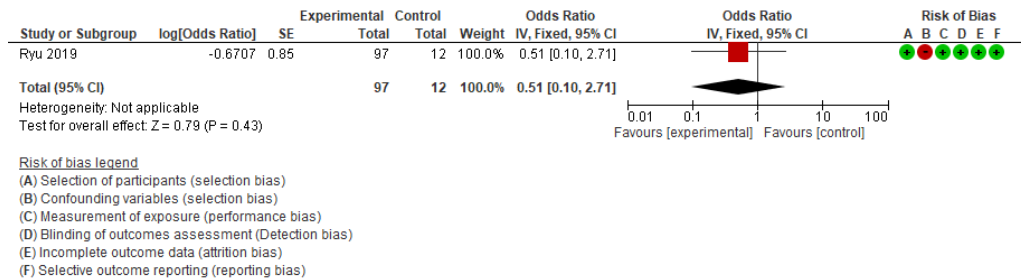

SE: Standard error; CI: Confidence interval; HC: Histological chorioamnionitis

19) Discharge with respiratory support (HC)

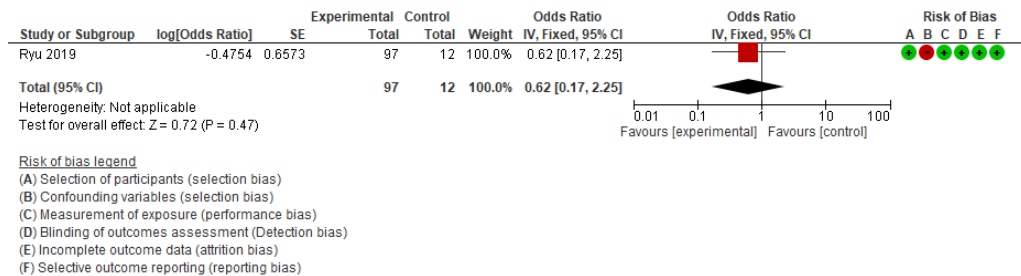

SE: Standard error; CI: Confidence interval; HC: Histological chorioamnionitis

20) Systemic inflammatory response syndrome

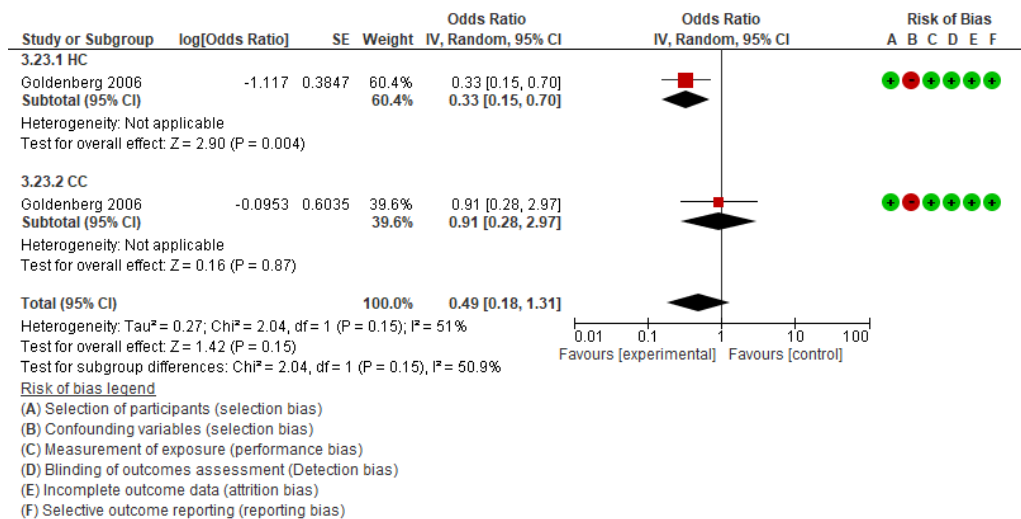

SE: Standard error; CI: Confidence interval; HC: Histological chorioamnionitis; CC: Clinical chorioamnionitis

## 21) Severe respiratory distress syndrome (RDS) (HC)

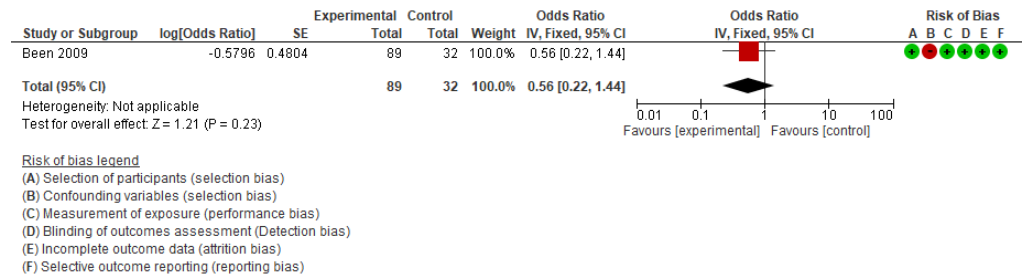

SE: Standard error; CI: Confidence interval; HC: Histological chorioamnionitis

## 22) Meningitis (HC)

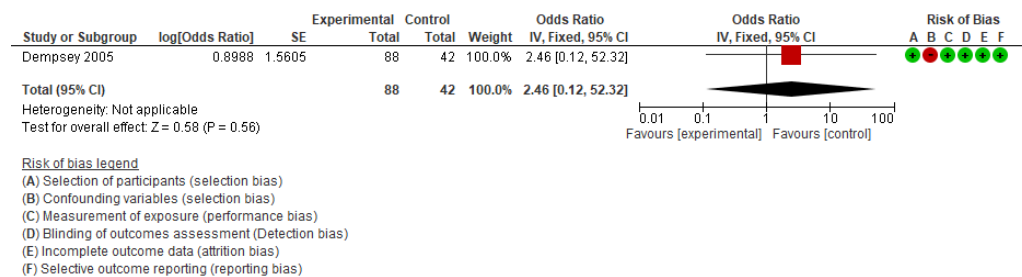

SE: Standard error; CI: Confidence interval; HC: Histological chorioamnionitis

## 23) Intrahepatic cholestasis (HC)

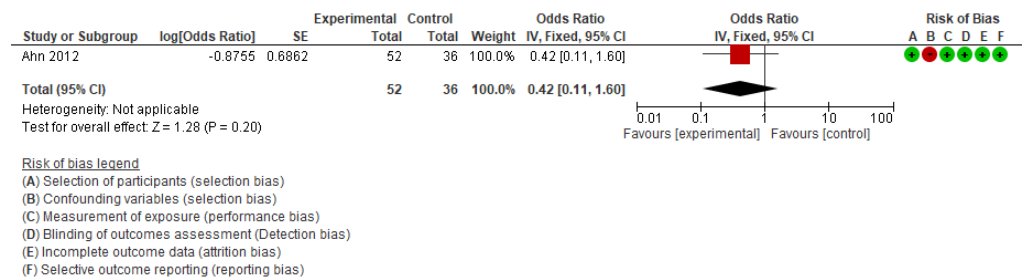

SE: Standard error; CI: Confidence interval; HC: Histological chorioamnionitis

## 24) Pneumonia (HC)

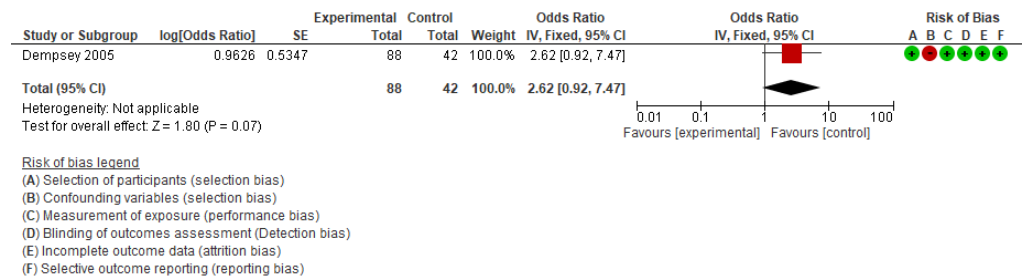



SE: Standard error; CI: Confidence interval; HC: Histological chorioamnionitis

Maternal outcomes for women with growth-restricted fetuses and/or small-for-gestational age infants

1) Caesarean section

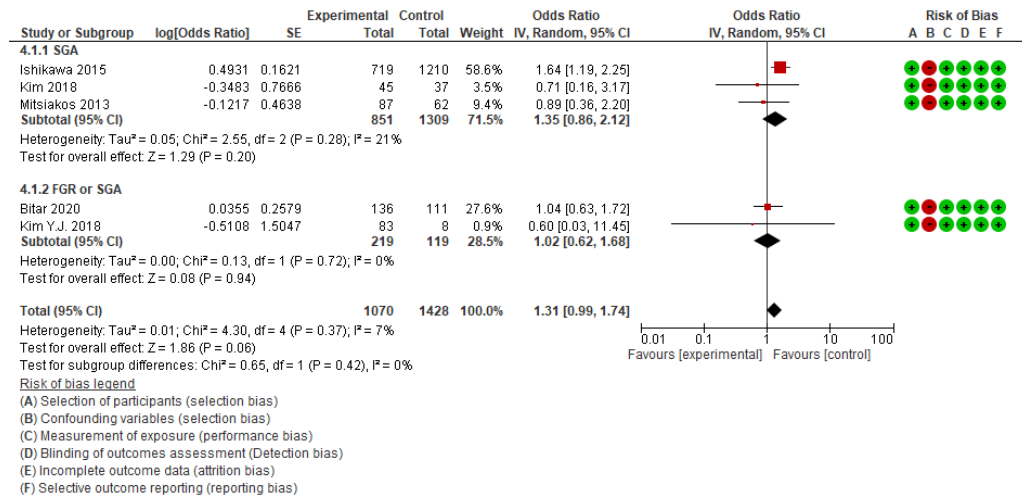

SE: Standard error; CI: Confidence interval; FGR: Fetus growth restriction; SGA: Small for gestational age

2) Chorioamnionitis (histologic and /or clinical)

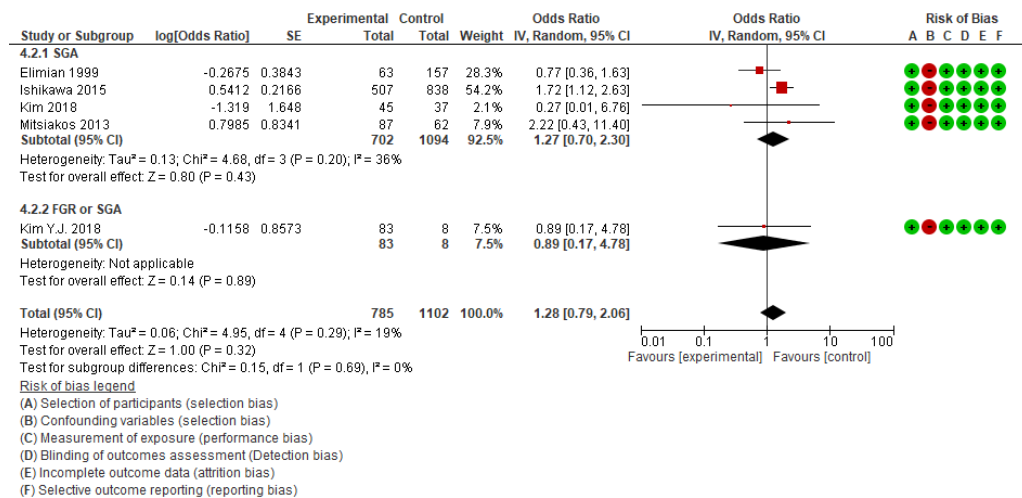

SE: Standard error; CI: Confidence interval; FGR: Fetus growth restriction; SGA: Small for gestational age

3) Preeclampsia.

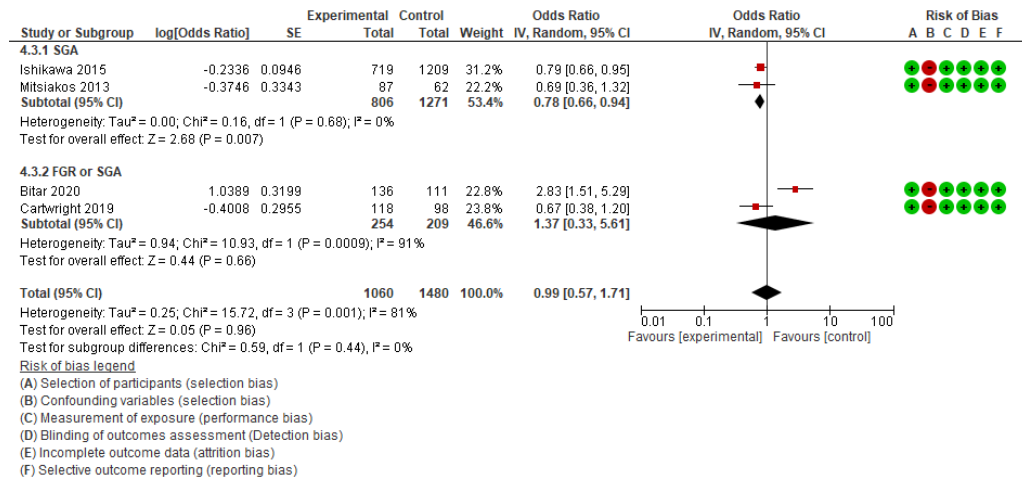

SE: Standard error; CI: Confidence interval; FGR: Fetus growth restriction; SGA: Small for gestational age

4) Gestational diabetes mellitus.

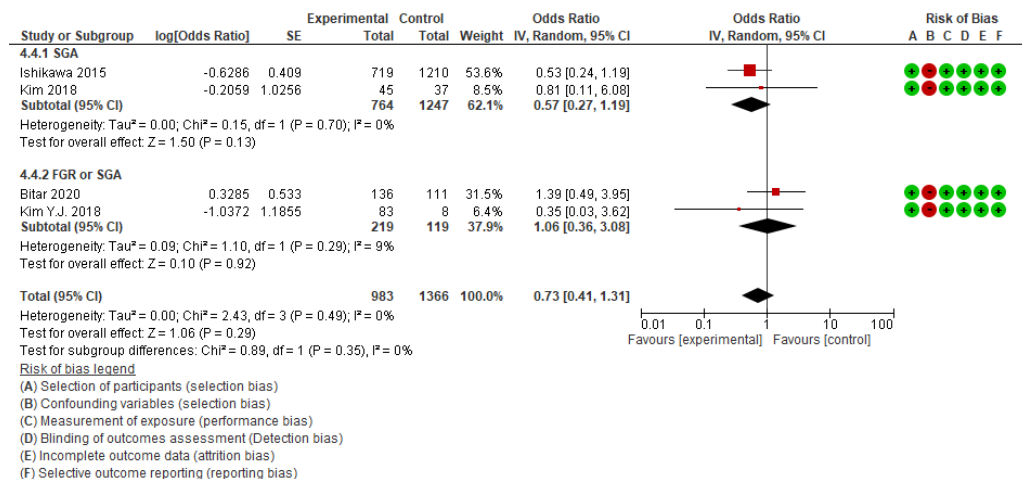

SE: Standard error; CI: Confidence interval; FGR: Fetus growth restriction; SGA: Small for gestational age

5) Pregnancy induced hypertension.

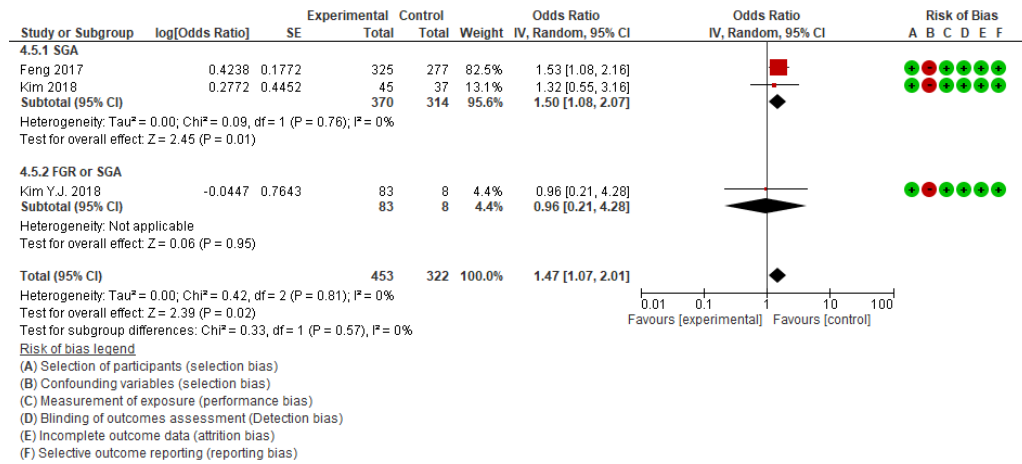

SE: Standard error; CI: Confidence interval; FGR: Fetus growth restriction; SGA: Small for gestational age

Neonatal outcomes for women with growth-restricted fetuses

1) Neonatal death

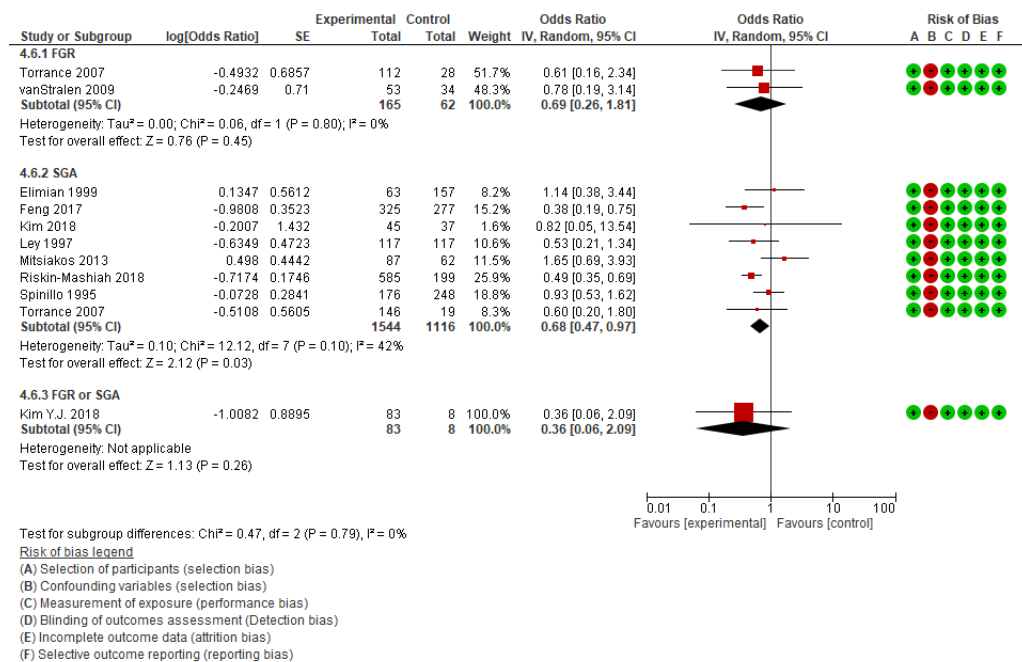

SE: Standard error; CI: Confidence interval; FGR: Fetus growth restriction; SGA: Small for gestational age

2) Death before discharge home

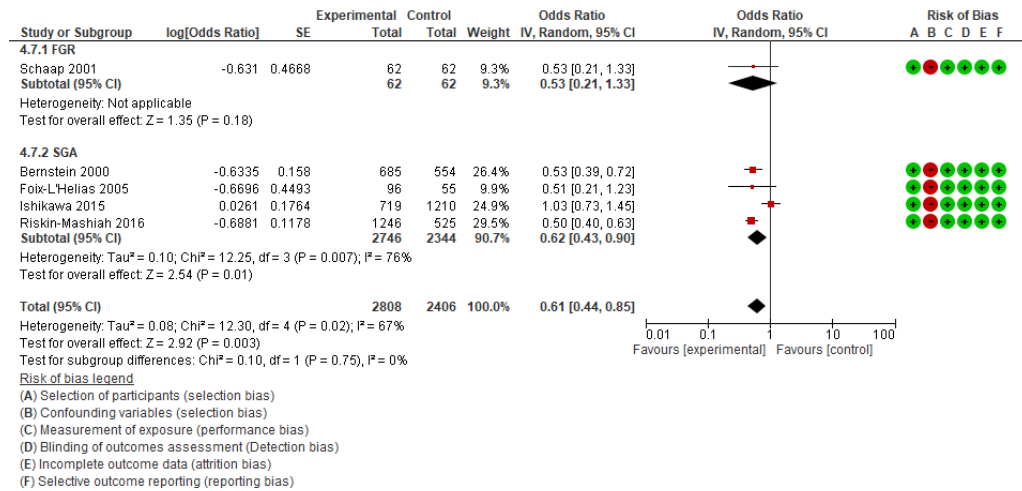

SE: Standard error; CI: Confidence interval; FGR: Fetus growth restriction; SGA: Small for gestational age

3) Respiratory distress syndrome (RDS) and moderate / severe RDS

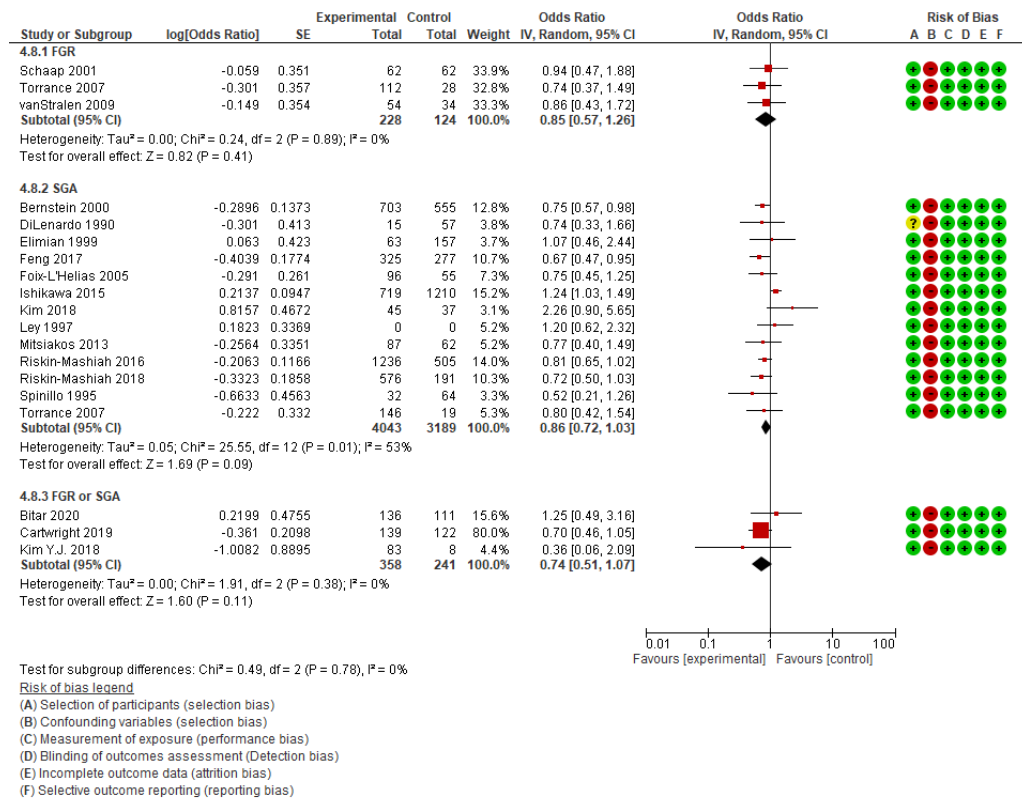

SE: Standard error; CI: Confidence interval; FGR: Fetus growth restriction; SGA: Small for gestational age

4) Surfactant use

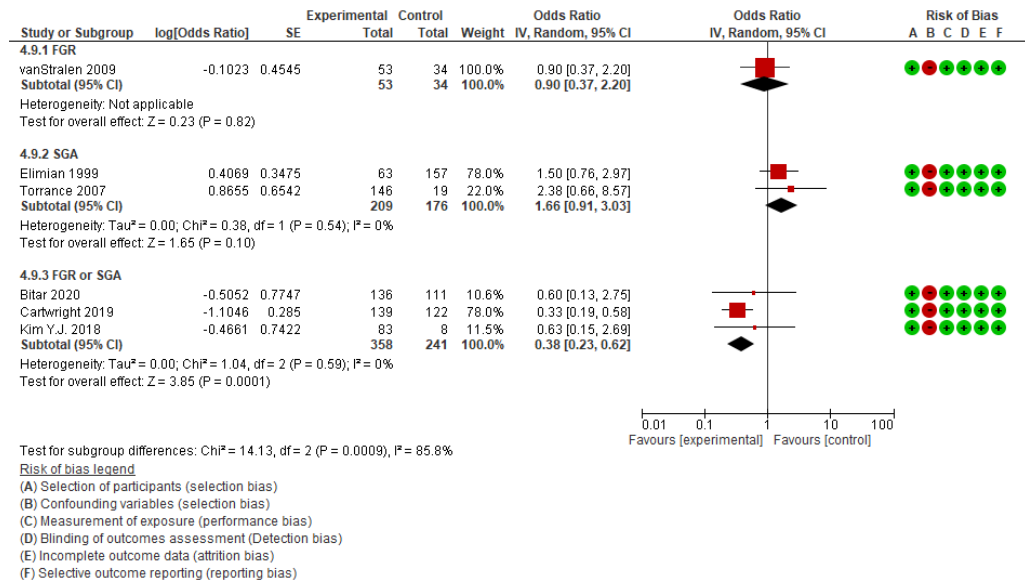

SE: Standard error; CI: Confidence interval; FGR: Fetus growth restriction; SGA: Small for gestational age

5) Major brain lesion (IVH, ICH, PVH, PVL)

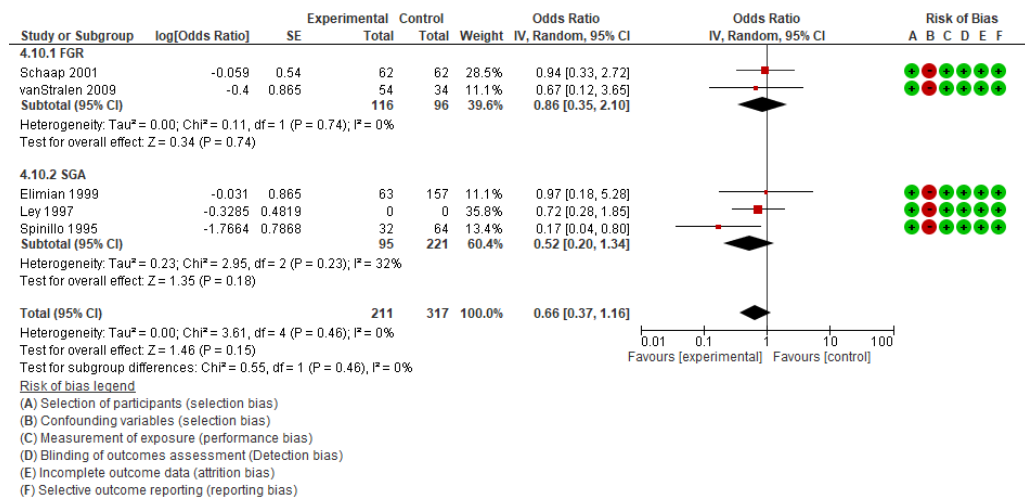

SE: Standard error; CI: Confidence interval; FGR: Fetus growth restriction; SGA: Small for gestational age

6) Interventricular haemorrhage

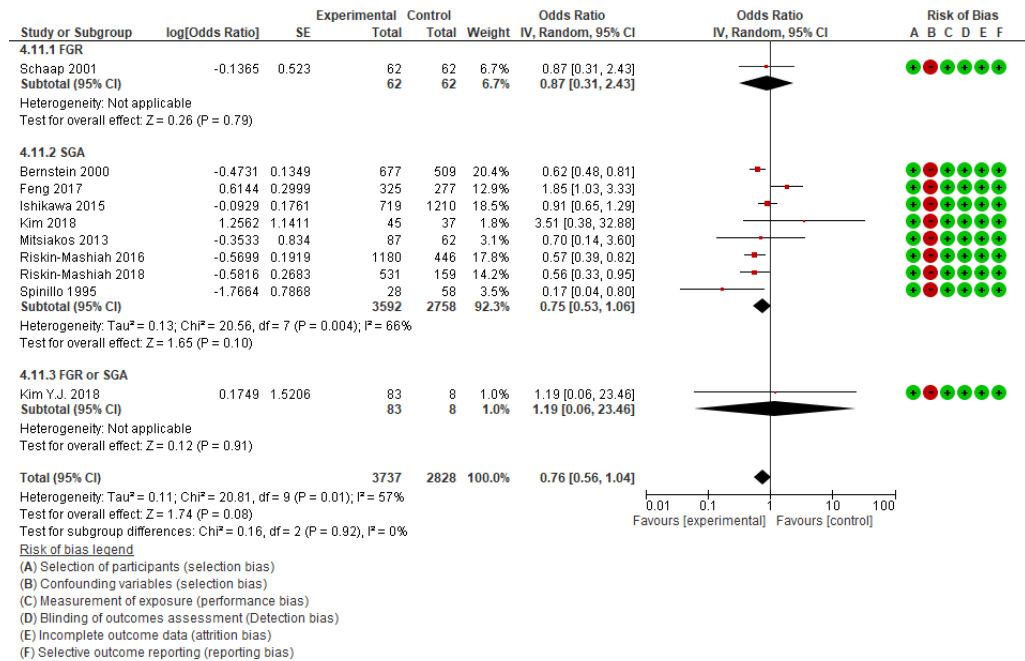

SE: Standard error; CI: Confidence interval; FGR: Fetus growth restriction; SGA: Small for gestational age

7) Severe interventricular haemorrhage (grade3-4)

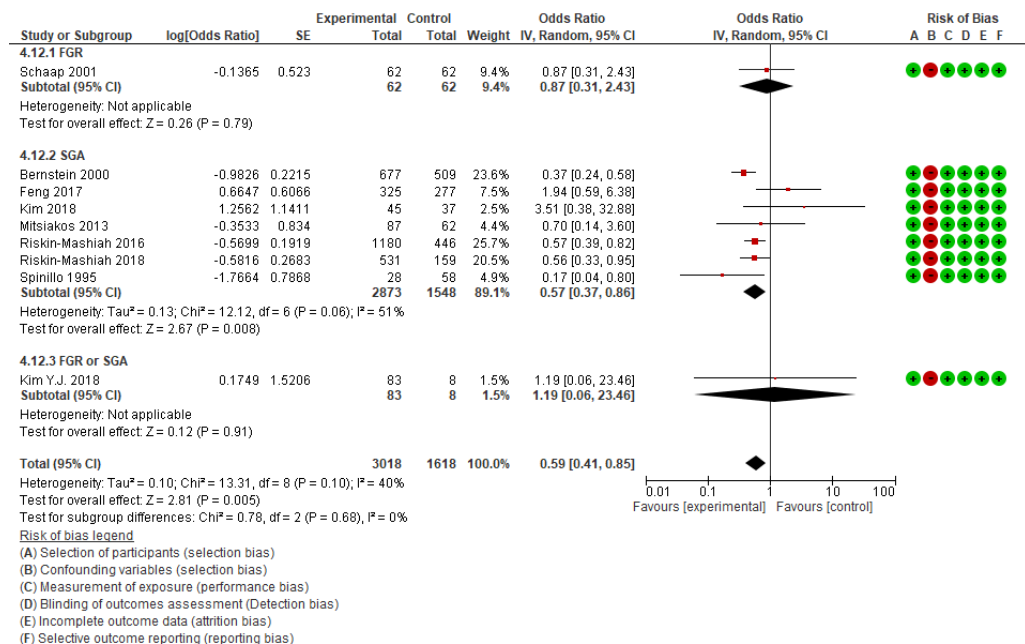

SE: Standard error; CI: Confidence interval; FGR: Fetus growth restriction; SGA: Small for gestational age

8) Periventricular leukomalacia (SGA)

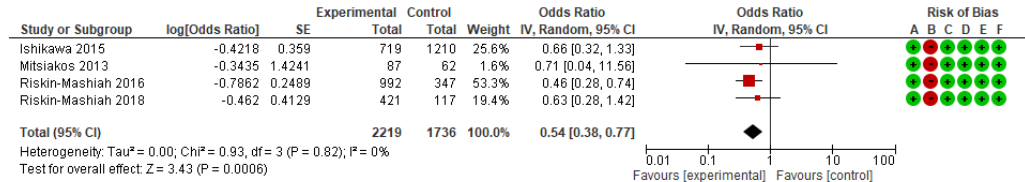

Risk of bias legend

- (A) Selection of participants (selection bias)
- (B) Confounding variables (selection bias)
- (C) Measurement of exposure (performance bias)
- (D) Blinding of outcomes assessment (Detection bias)
- (E) Incomplete outcome data (attrition bias)
- (F) Selective outcome reporting (reporting bias)

SE: Standard error; CI: Confidence interval; SGA: Small for gestational age

9) Neonatal sepsis

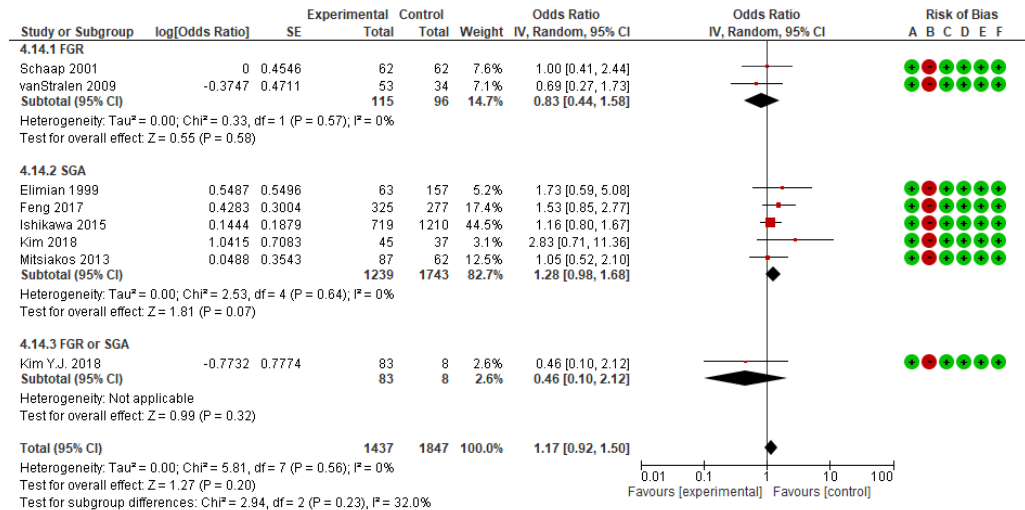

Risk of bias legend

- (A) Selection of participants (selection bias)
- (B) Confounding variables (selection bias)
- (C) Measurement of exposure (performance bias)
- (D) Blinding of outcomes assessment (Detection bias)
- (E) Incomplete outcome data (attrition bias)
- (F) Selective outcome reporting (reporting bias)

SE: Standard error; CI: Confidence interval; FGR: Fetus growth restriction; SGA: Small for gestational age

10) Necrotizing enterocolitis

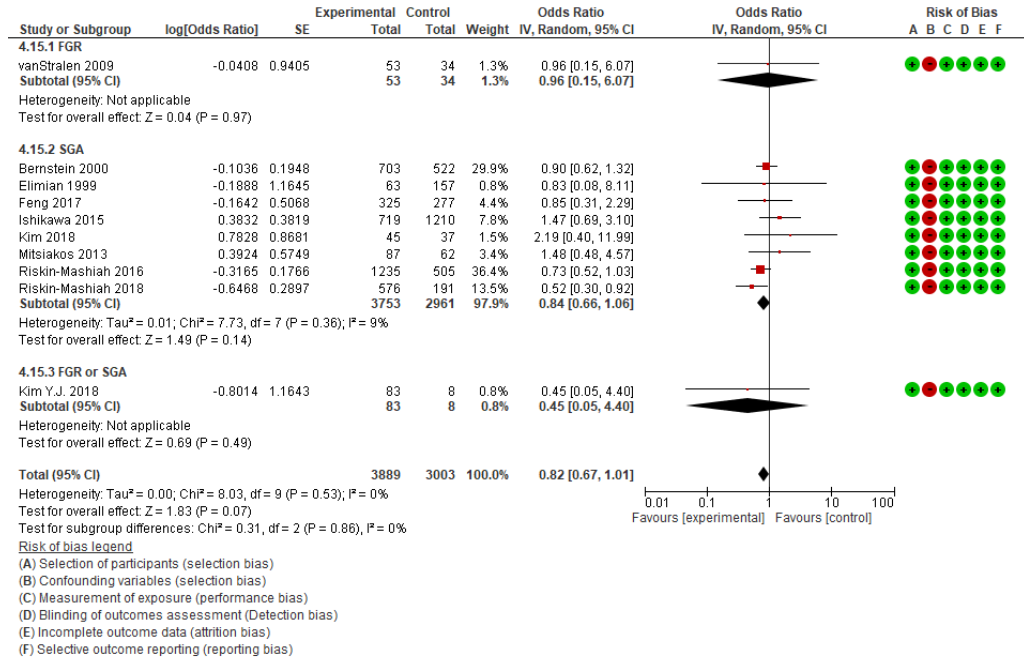

SE: Standard error; CI: Confidence interval; FGR: Fetus growth restriction; SGA: Small for gestational age

11) Patent ductus arteriosus

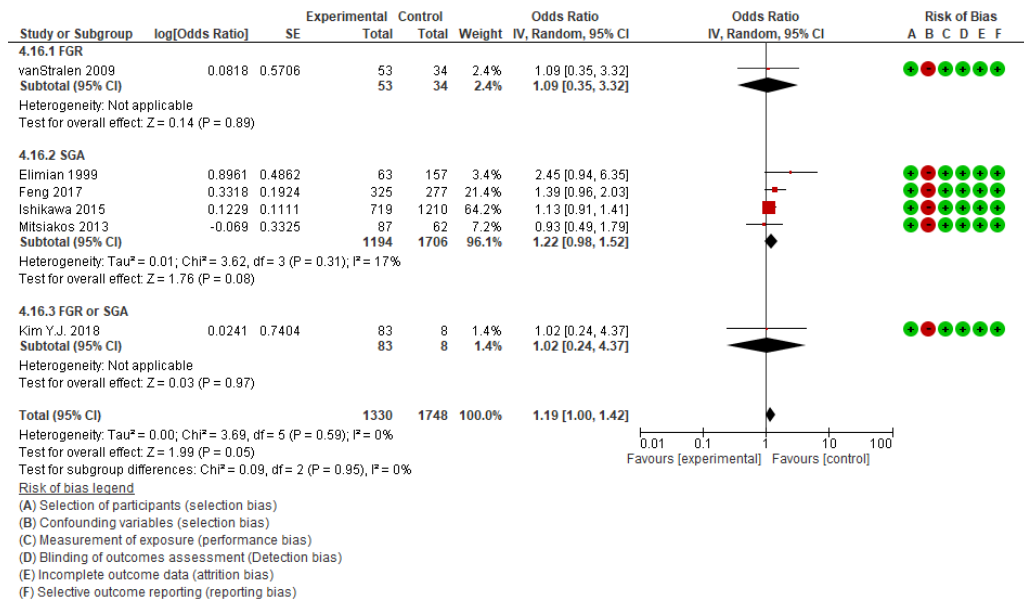

SE: Standard error; CI: Confidence interval; FGR: Fetus growth restriction; SGA: Small for gestational age



12) Chronic lung disease / bronchopulmonary dysplasia

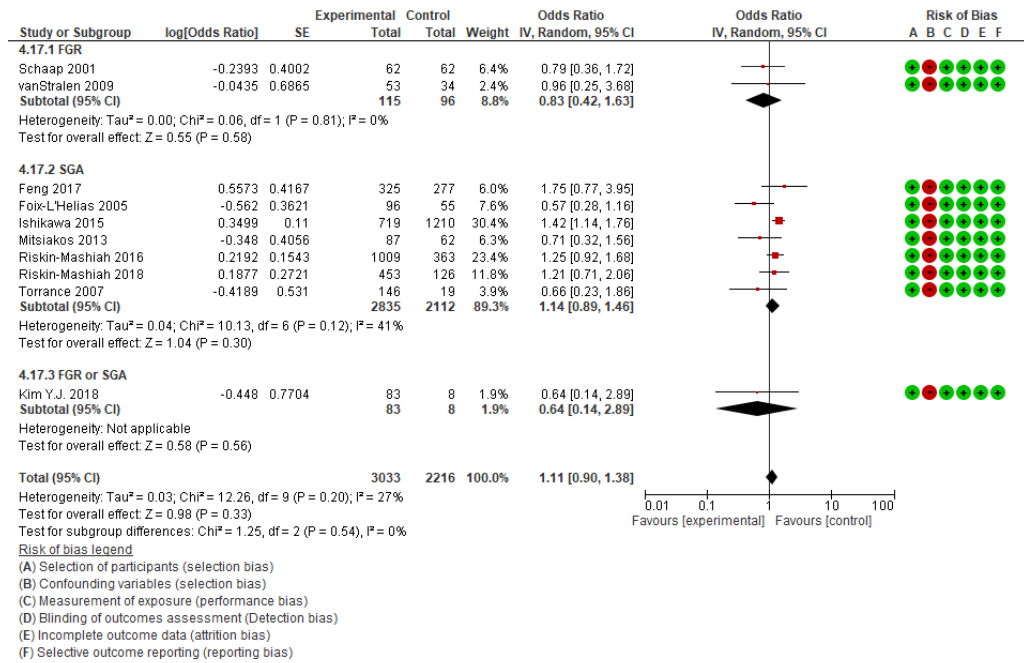

SE: Standard error; CI: Confidence interval; FGR: Fetus growth restriction; SGA: Small for gestational age

13) Small for gestational age (< 2.3rd percentile for gestational age) (SGA)

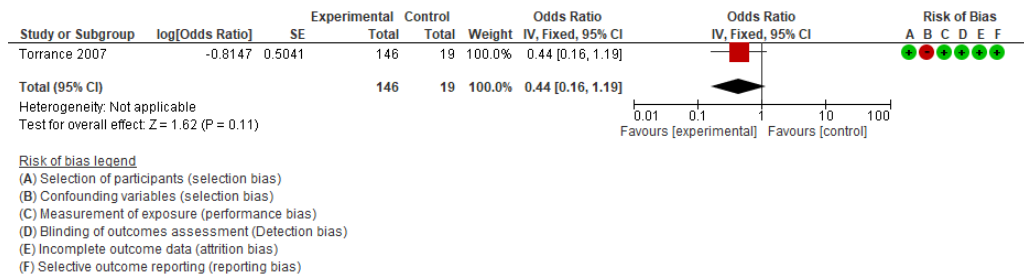

SE: Standard error; CI: Confidence interval

14) Duration of mechanical ventilation (FGR)

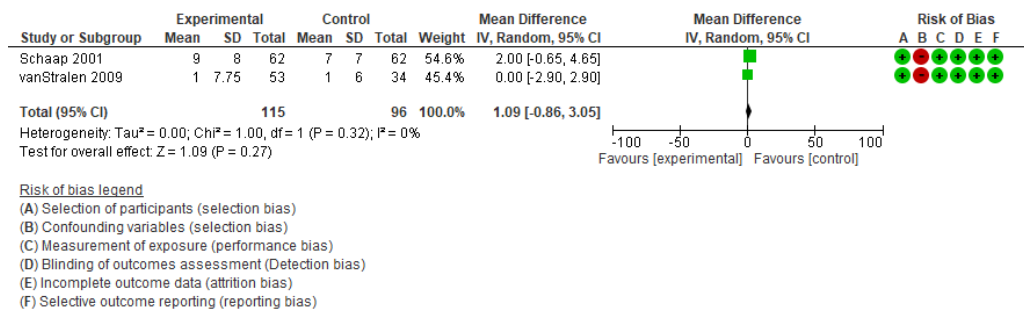

SE: Standard error; CI: Confidence interval; FGR: Fetus growth restriction

15) Use of mechanical ventilation

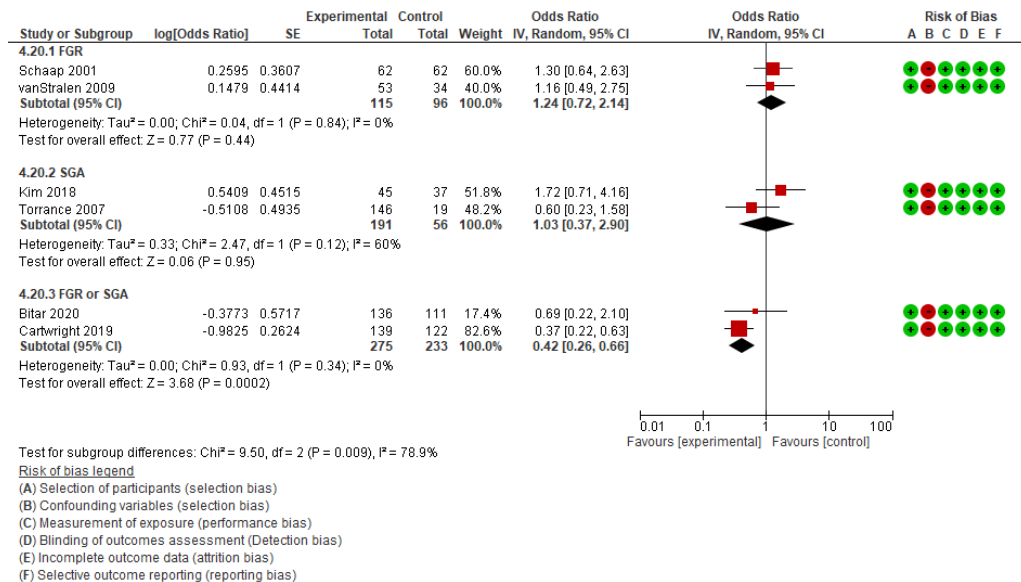

SE: Standard error; CI: Confidence interval; FGR: Fetus growth restriction; SGA: Small for gestational age

16) Apgar score < 7 at 5 minutes

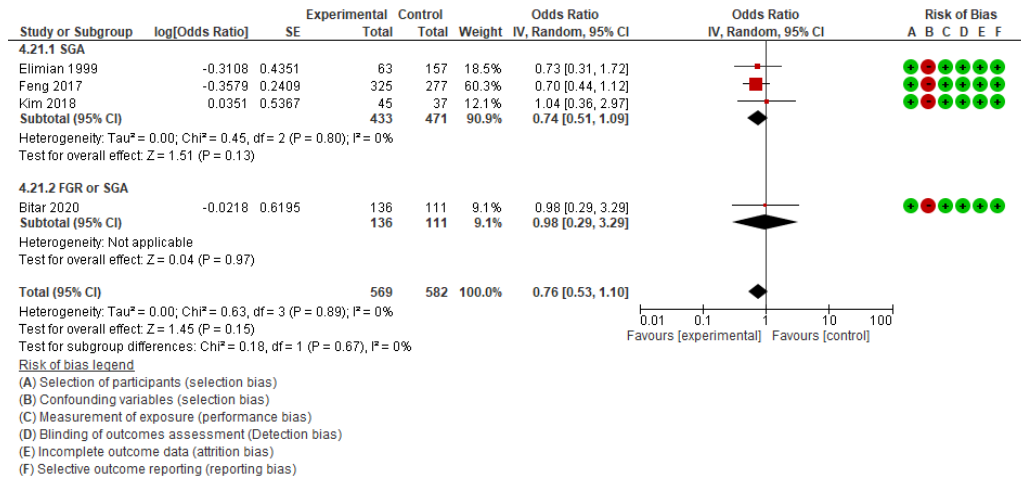

SE: Standard error; CI: Confidence interval; FGR: Fetus growth restriction; SGA: Small for gestational age

17) Apgar score < 5 at 1 minute (SGA)

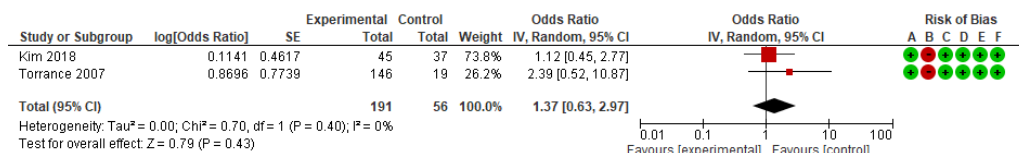

Risk of bias legend

- (A) Selection of participants (selection bias)
- (B) Confounding variables (selection bias)
- (C) Measurement of exposure (performance bias)
- (D) Blinding of outcomes assessment (Detection bias)
- (E) Incomplete outcome data (attrition bias)
- (F) Selective outcome reporting (reporting bias)

SE: Standard error; CI: Confidence interval; SGA: Small for gestational age

18) Hypotension (FGR)

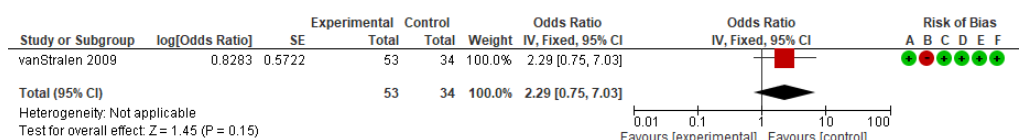

Risk of bias legend

- (A) Selection of participants (selection bias)
- (B) Confounding variables (selection bias)
- (C) Measurement of exposure (performance bias)
- (D) Blinding of outcomes assessment (Detection bias)
- (E) Incomplete outcome data (attrition bias)
- (F) Selective outcome reporting (reporting bias)

SE: Standard error; CI: Confidence interval; FGR: Fetus growth restriction

19) Growth < 10th percentile in early childhood (FGR)

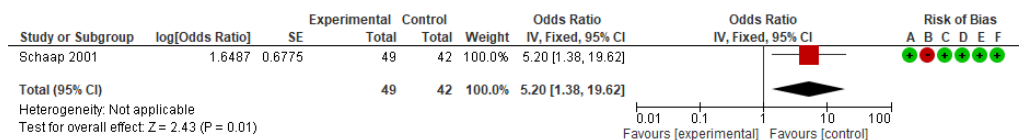

Risk of bias legend

- (A) Selection of participants (selection bias)
- (B) Confounding variables (selection bias)
- (C) Measurement of exposure (performance bias)
- (D) Blinding of outcomes assessment (Detection bias)
- (E) Incomplete outcome data (attrition bias)
- (F) Selective outcome reporting (reporting bias)

SE: Standard error; CI: Confidence interval; FGR: Fetus growth restriction

20) Abnormal behavior at long-term follow-up at school age (FGR)

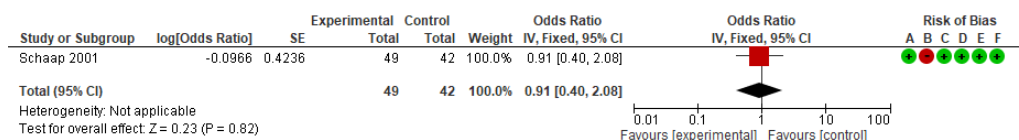

Risk of bias legend

- (A) Selection of participants (selection bias)
- (B) Confounding variables (selection bias)
- (C) Measurement of exposure (performance bias)
- (D) Blinding of outcomes assessment (Detection bias)
- (E) Incomplete outcome data (attrition bias)
- (F) Selective outcome reporting (reporting bias)

SE: Standard error; CI: Confidence interval; FGR: Fetus growth restriction

21) Neonatal hypoglycemia

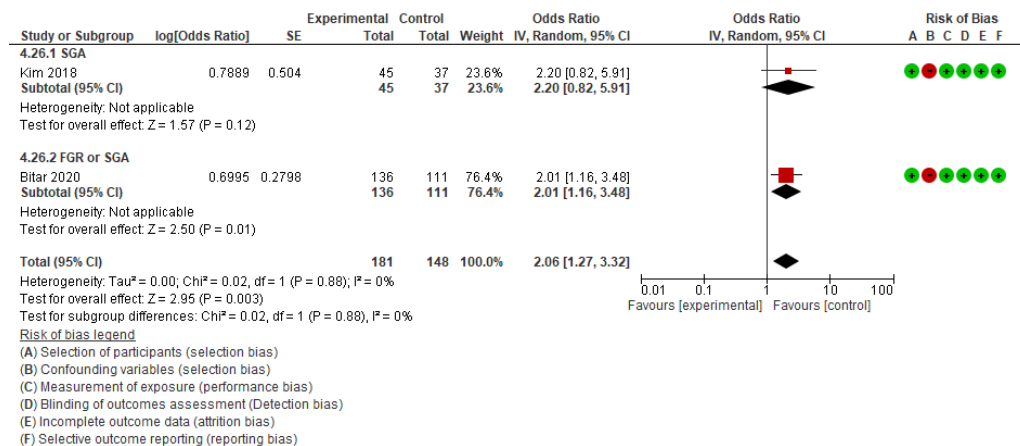

SE: Standard error; CI: Confidence interval; FGR: Fetus growth restriction; SGA: Small for gestational age

22) Oxygen therapy (FGR or SGA)

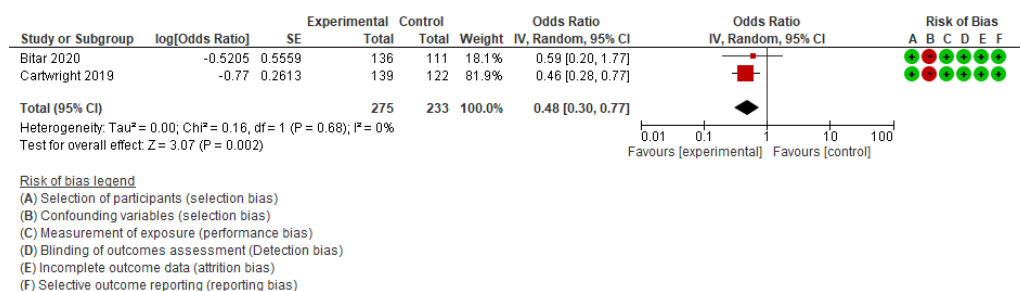

SE: Standard error; CI: Confidence interval; FGR: Fetus growth restriction; SGA: Small for gestational age

23) Gestational age at birth

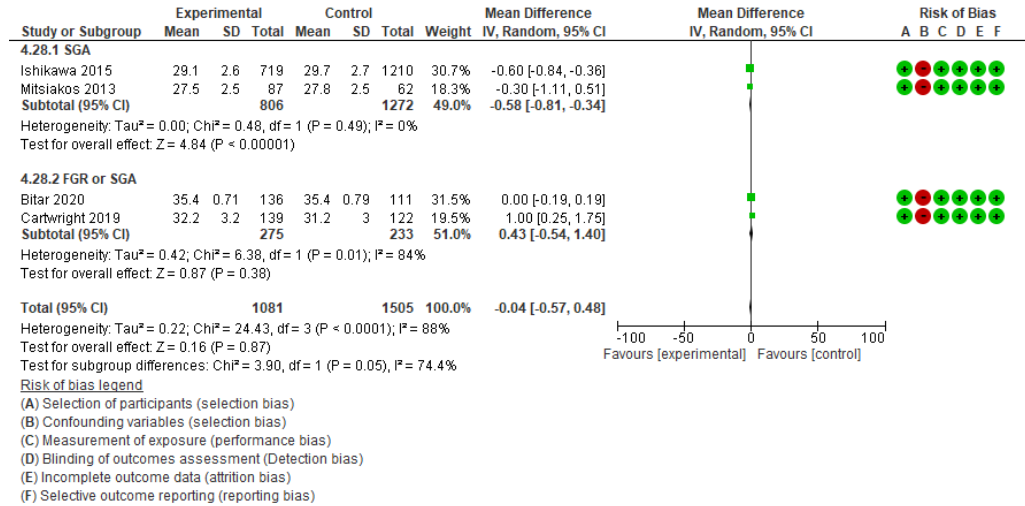

SE: Standard error; CI: Confidence interval; FGR: Fetus growth restriction; SGA: Small for gestational age

24) Retinopathy of prematurity

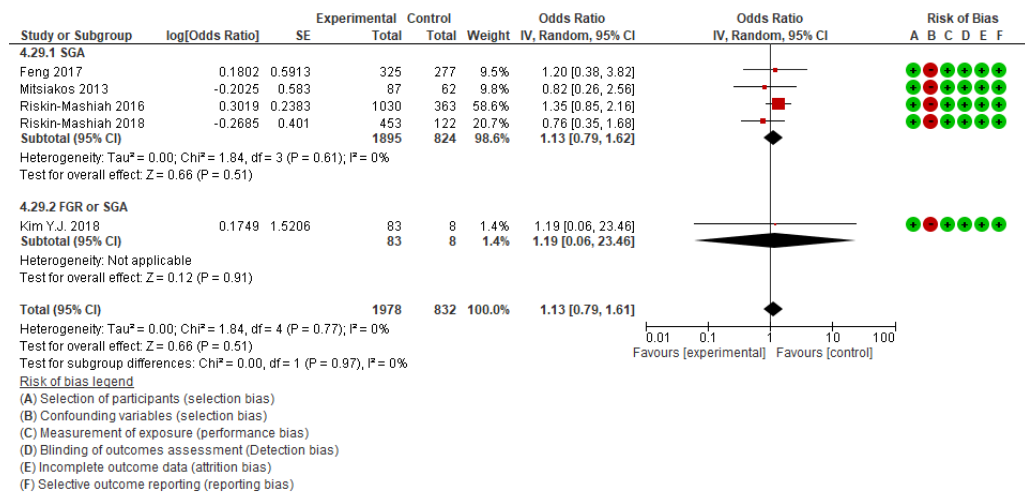

SE: Standard error; CI: Confidence interval; FGR: Fetus growth restriction; SGA: Small for gestational age

25) Neonatal adrenal insufficiency

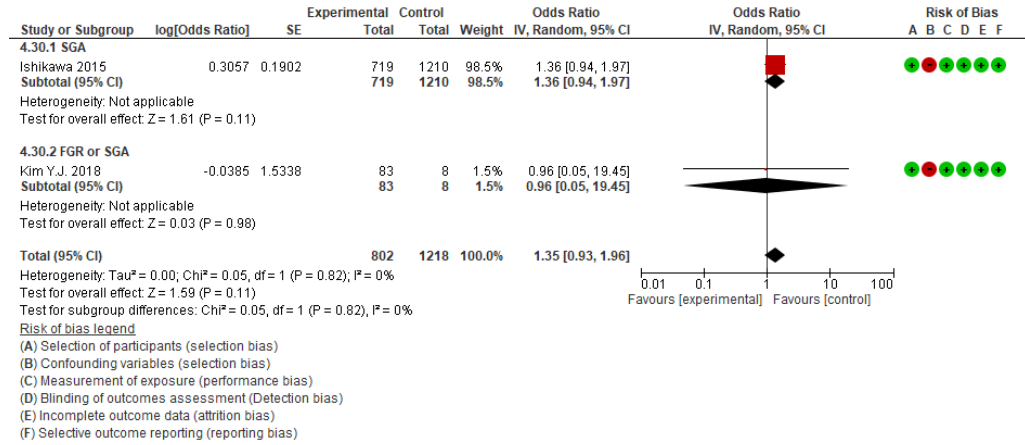

SE: Standard error; CI: Confidence interval; FGR: Fetus growth restriction; SGA: Small for gestational age

26) Survival free of disability (FGR or SGA)

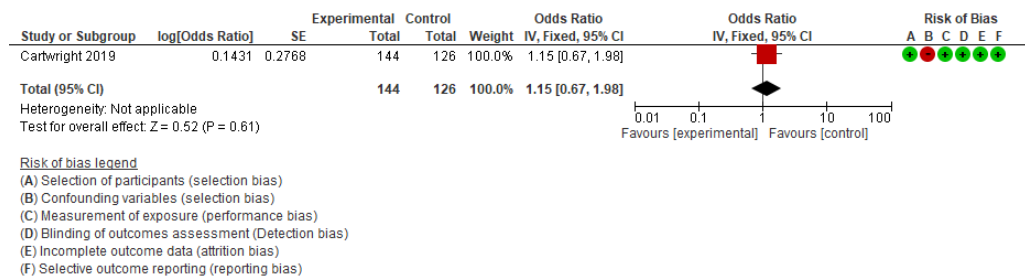

SE: Standard error; CI: Confidence interval; FGR: Fetus growth restriction; SGA: Small for gestational age

27) Cerebral palsy

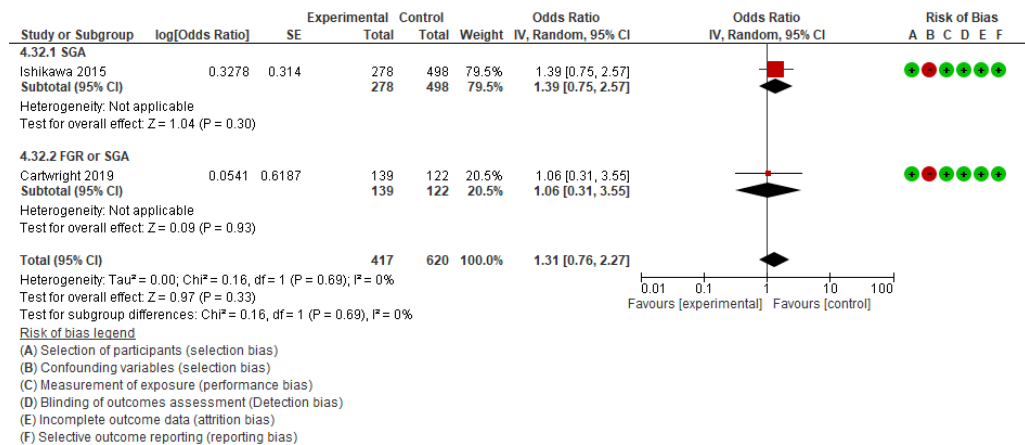

SE: Standard error; CI: Confidence interval; FGR: Fetus growth restriction; SGA: Small for gestational age

28) Severe hearing impairment (SGA)

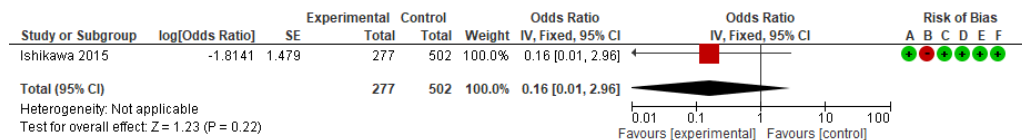

Risk of bias legend

- (A) Selection of participants (selection bias)
- (B) Confounding variables (selection bias)
- (C) Measurement of exposure (performance bias)
- (D) Blinding of outcomes assessment (Detection bias)
- (E) Incomplete outcome data (attrition bias)
- (F) Selective outcome reporting (reporting bias)

SE: Standard error; CI: Confidence interval; SGA: Small for gestational age

29) Visual impairment (SGA)

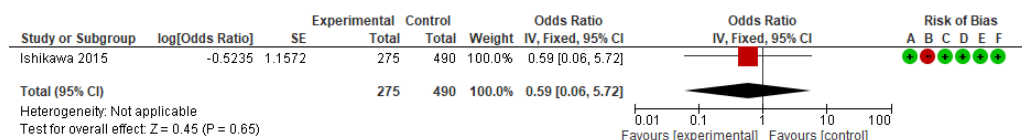

Risk of bias legend

- (A) Selection of participants (selection bias)
- (B) Confounding variables (selection bias)
- (C) Measurement of exposure (performance bias)
- (D) Blinding of outcomes assessment (Detection bias)
- (E) Incomplete outcome data (attrition bias)
- (F) Selective outcome reporting (reporting bias)

SE: Standard error; CI: Confidence interval; SGA: Small for gestational age

30) Birth weight

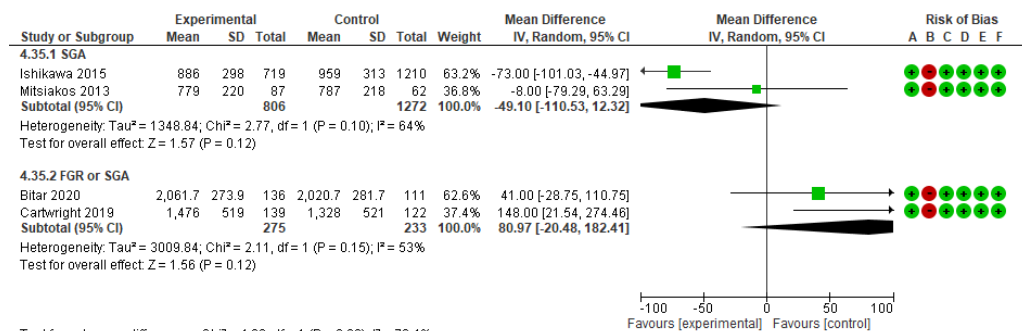

Risk of bias legend

- (A) Selection of participants (selection bias)
- (B) Confounding variables (selection bias)
- (C) Measurement of exposure (performance bias)
- (D) Blinding of outcomes assessment (Detection bias)
- (E) Incomplete outcome data (attrition bias)
- (F) Selective outcome reporting (reporting bias)

SE: Standard error; CI: Confidence interval; FGR: Fetus growth restriction; SGA: Small for gestational age

31) Admission to neonatal intensive care unit (FGR or SGA)

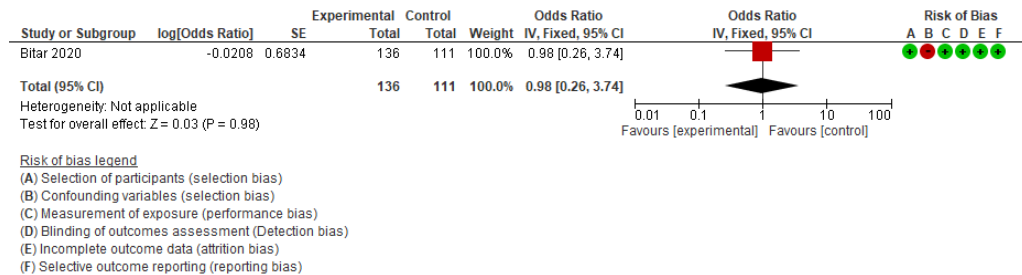

SE: Standard error; CI: Confidence interval; FGR: Fetus growth restriction; SGA: Small for gestational age

32) Duration of hospital stay

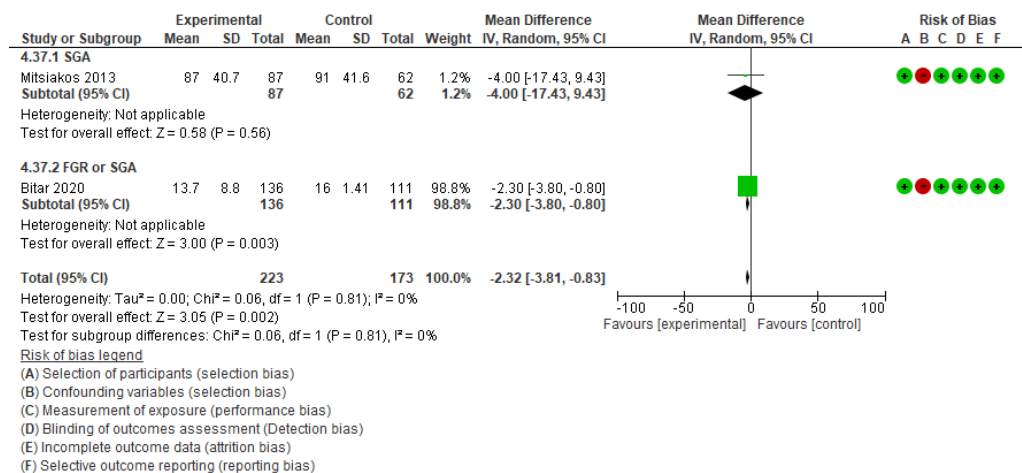

SE: Standard error; CI: Confidence interval; FGR: Fetus growth restriction; SGA: Small for gestational age

33) Death at long-term follow-up (school age) (FGR)

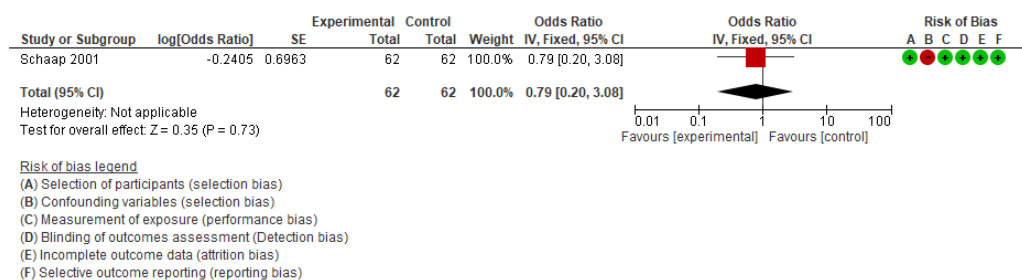

SE: Standard error; CI: Confidence interval; FGR: Fetus growth restriction



34) Death or disability/handicap at 2yrs' corrected age (FGR)

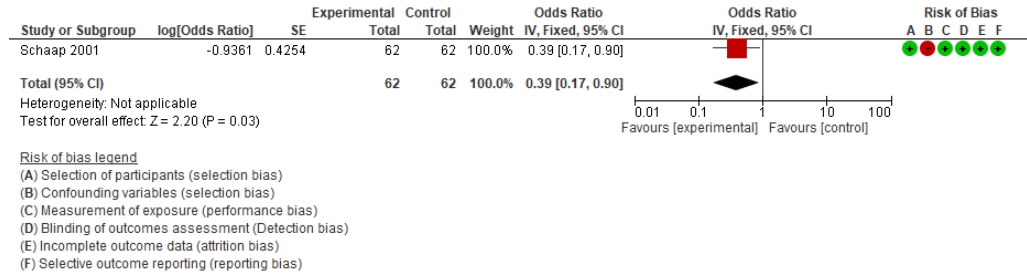

SE: Standard error; CI: Confidence interval; FGR: Fetus growth restriction
