# Supplementary material for: Antenatal corticosteroids in specific groups at risk of preterm birth: a systematic review
Source: PubMed Central journal article supplement — BMJ Open. 2023 Sep 22;13(9):e065070. doi: 10.1136/bmjopen-2022-065070 (PMC10533784; doi:10.1136/bmjopen-2022-065070), 2023-09-22
Supplement: bmjopen-2022-065070supp005.pdf [file bmjopen-2022-065070supp005.pdf]

## Supplementary table 1: Characteristic tables

Table 1: Characteristics of included studies for women with pregestational and/or gestational diabetes mellitus

| Author, year            | Study design         | N (treatment, control)                                      | Study period | Location | Inclusion criteria                        | Exclusion criteria                                                                      | PGDM or GDM | Antenatal corticosteroid course |           |              |            |
|-------------------------|----------------------|-------------------------------------------------------------|--------------|----------|-------------------------------------------|-----------------------------------------------------------------------------------------|-------------|---------------------------------|-----------|--------------|------------|
|                         |                      |                                                             |              |          |                                           |                                                                                         |             | Drug                            | Dose (mg) | Interval (h) | Repeat ACS |
| Battarbee et al., 2020  | Retrospective cohort | Pregnant women<br>510 (439, 71)<br>Infants<br>615 (536, 79) | 2008–2011    | USA      | Women giving birth at GA 23–33weeks       | Stillborn, nonresuscitated cases                                                        | PGDM or GDM | NS                              | NS        | NS           | Yes        |
| Cassimatis et al., 2020 | Retrospective cohort | Pregnant women=infants<br>54 (18, 36)                       | 2014–2017    | USA      | Women giving birth in late preterm        | Congenital anomalies, multiple pregnancy                                                | PGDM        | Beta                            | 12        | 24           | No         |
| Krispijn et al., 2018   | Retrospective cohort | Pregnant women=infants<br>161 (47, 114) <sup>1)</sup>       | 2012–2016    | Israel   | Women giving birth in late preterm period | Preterm PROM, multiple gestations, PGDM, fetal anomaly, fetal chromosomal abnormalities | GDM         | Beta                            | 12        | 24           | No         |

\*ACS: Antenatal corticosteroid, Beta: Betamethasone, CS: Cesarean section, Dex: Dexamethasone, GA: Gestational age, GDM: Gestational diabetes mellitus, NS: Not stated, PGDM: Pregestational diabetes mellitus, PROM: Premature rupture of the membranes

<sup>1)</sup> This study included 2262 women who gave birth in the late preterm and term period. Data were extracted and reported for women in the late-preterm delivery group (n = 161) only.

Table 2: Characteristics of included studies for women undergoing elective cesarean section in the late preterm period

| Author, year               | Study design         | N (treatment, control)                  | Study period | Location | Inclusion criteria                                                          | Exclusion criteria                                                                    | Antenatal corticosteroid course |           |              |            |
|----------------------------|----------------------|-----------------------------------------|--------------|----------|-----------------------------------------------------------------------------|---------------------------------------------------------------------------------------|---------------------------------|-----------|--------------|------------|
|                            |                      |                                         |              |          |                                                                             |                                                                                       | Drug                            | Dose (mg) | Interval (h) | Repeat ACS |
| de la Hueriga et al., 2019 | Retrospective cohort | Pregnant women=infants<br>40 (30, 10)   | 2013–2017    | Spain    | Women undergoing elective CS between 35 weeks 0 days and 36 weeks 6 days    | Congenital anomalies, transferred to other hospitals                                  | Beta                            | NS        | NS           | NS         |
| Kirshenbaum et al., 2018   | Case-control         | Pregnant women=infants<br>165 (58, 107) | 2011–2013    | Israel   | Women undergoing elective CS between GA 34 weeks 0 days and 37 weeks 0 days | Multiple pregnancy, congenital anomalies, chromosomal abnormalities, chorioamnionitis | Beta                            | 12        | 24           | No         |

|                                            |     |                                             |           |     |                                                                                                                                                       |                                                                                                                                                                                                                                                               |      |    |    |    |
|--------------------------------------------|-----|---------------------------------------------|-----------|-----|-------------------------------------------------------------------------------------------------------------------------------------------------------|---------------------------------------------------------------------------------------------------------------------------------------------------------------------------------------------------------------------------------------------------------------|------|----|----|----|
| Gyamfi-Bannerman et al., 2016 <sup>a</sup> | RCT | Pregnant women=infants<br>2827 (1427, 1400) | 2010-2015 | USA | Women with a singleton pregnancy at 34 weeks 0 days to 36 weeks 5 days of gestation, who were high probability of delivery in the late preterm period | Received ACS previously during the pregnancy, Expected to deliver in less than 12 hours for any reasons, Lack of gestational dating based on ultrasonography before GA 32 weeks, Lack of gestational dating based on last menstrual period before GA 24 weeks | Beta | 12 | 24 | No |
|--------------------------------------------|-----|---------------------------------------------|-----------|-----|-------------------------------------------------------------------------------------------------------------------------------------------------------|---------------------------------------------------------------------------------------------------------------------------------------------------------------------------------------------------------------------------------------------------------------|------|----|----|----|

\*ACS: Antenatal corticosteroid, Beta: Betamethasone, CS: Cesarean section, GA: Gestational age, NS: Not stated, RCT: Randomized controlled trial

<sup>a</sup>)Gyamfi-Bannerman (2016) did not provide the data on our review outcomes.

Table 3-a: Characteristics of included studies for women with chorioamnionitis (histological or clinical)

| Author, year               | Study design         | N (treatment, control)                                     | Study period | Location          | Inclusion criteria                                                | Exclusion criteria                                                                                            | HC | CC        | Antenatal corticosteroid course |           |              |            |
|----------------------------|----------------------|------------------------------------------------------------|--------------|-------------------|-------------------------------------------------------------------|---------------------------------------------------------------------------------------------------------------|----|-----------|---------------------------------|-----------|--------------|------------|
|                            |                      |                                                            |              |                   |                                                                   |                                                                                                               |    |           | Drug                            | Dose (mg) | Interval (h) | Repeat ACS |
| Ryu et al., 2019           | Retrospective cohort | Pregnant women=infants<br>109 (97, 12)                     | 2007–2014    | Republic of Korea | Women giving birth between GA 23weeks 0 days and 33 weeks 6 days  | Multiple gestations, congenital anomalies, SGA or LGA, transferred to other hospitals, incomplete information | HC | Beta /Dex | NS                              | NS        | No           |            |
| Ahn et al., 2012           | Prospective cohort   | Pregnant women<br>no data<br>Infants<br>88 (52, 36)        | 2005–2010    | Republic of Korea | Women giving birth at GA < 34 weeks                               | Congenital anomalies, transferred from other hospitals                                                        | HC | Dex       | 5                               | 12        | No           |            |
| Been et al., 2009          | Prospective cohort   | Pregnant women=infants<br>HC121 (89, 32)<br>CC93 (64,29)   | 2001–2003    | Netherlands       | Women giving birth at GA < 32 weeks                               | Congenital anomalies                                                                                          | HC | CC        | Beta                            | 12        | 24           | No         |
| Goldenberg et al., 2006    | Retrospective cohort | Pregnant women=infants<br>HC218 (182, 36)<br>CC93 (64, 29) | 1996–2001    | USA               | Women giving birth between GA 23 weeks 0 days and 32 weeks 6 days | Multiple gestations                                                                                           | HC | CC        | Beta                            | 12        | 24           | Yes        |
| Dempsey et al., 2005       | Retrospective cohort | Pregnant women=infants<br>130 (88, 42)                     | 1989–1999    | USA               | Women giving birth at GA < 30 weeks                               | Multiple gestations                                                                                           | HC | Beta      | 12                              | 24        | NS           |            |
| Foix-L'Helias et al., 2005 | Retrospective cohort | Pregnant women=infants<br>97 (45, 52)                      | 1993–1996    | France            | Women giving birth between GA 24 weeks 0 days and 31 weeks 6 days | Multiple gestations                                                                                           | CC | Beta /Dex | NS                              | NS        | Yes          |            |
| Baud et al., 2000          | Retrospective cohort | Pregnant women=infants<br>170 (60, 110)                    | 1993–1997    | France            | Women giving birth at GA < 33 weeks                               | Multiple gestations, severe DM                                                                                | CC | Beta /Dex | NS                              | NS        | Yes          |            |
| Elimian et al., 2000       | Retrospective cohort | Pregnant women=infants<br>527 (169, 358)                   | 1990–1997    | USA               | Birth weight: 500–1750 g                                          | CC                                                                                                            | HC | Beta      | 12                              | 24        | Yes          |            |

\*ACS: Antenatal corticosteroid, Beta: Betamethasone, CC: Clinical chorioamnionitis, Dex: Dexamethasone, DM: Diabetes mellitus, GA: Gestational age, HC: Histological chorioamnionitis, LGA: Large for gestational age, SGA: Small for gestational age, NS: Not stated

Table 3-b: Diagnostic criteria on histological and clinical chorioamnionitis from individual studies

| Author, year               | HC, CC | Diagnostic criteria                                                                                                                                                                                                                                                                                                                                                                    |
|----------------------------|--------|----------------------------------------------------------------------------------------------------------------------------------------------------------------------------------------------------------------------------------------------------------------------------------------------------------------------------------------------------------------------------------------|
| Ryu et al., 2019           | HC     | Salafia et al.*2                                                                                                                                                                                                                                                                                                                                                                       |
| Ahn et al., 2012           | HC     | No written diagnostic criteria                                                                                                                                                                                                                                                                                                                                                         |
| Been et al., 2009          | HC/ CC | HC: Redline et al. *3<br>CC: maternal temperature greater than 38.0°C in the absence of another focus for infection, with two or more of the following criteria: uterine tenderness, malodorous vaginal discharge, maternal leucocytosis (WBC>15000cells/μL), raised serum C-reactive protein, maternal tachycardia (>100 beats/min), and fetal tachycardia (>160 beats/min)           |
| Goldernberg et al., 2006   | HC/ CC | HC: Redline et al.*3, Faye-Petersen et al.*4, Bendon et al.*5<br>CC: diagnosed by an obstetrician, usually for a combination of fever, abdominal pain, and elevated white count                                                                                                                                                                                                        |
| Dempsey et al., 2005       | HC     | HC: the presence of abundant polymorphonuclear leukocytes in the chorion and amnion                                                                                                                                                                                                                                                                                                    |
| Foix-L'Helias et al., 2005 | CC     | CC: defined by the association of preterm labor and at least two of the following criteria: a) maternal temperature greater than 38°C, b) maternal serum C reactive protein concentration >20mg/l, c) positive bacterial culture of amniotic fluid (amniocentesis), d) documented early onset neonatal sepsis                                                                          |
| Baud et al., 2000          | CC     | CC: defined by the association of preterm labor and at least two pre and/ or intrapartum criteria of maternal fever (temperature > 38°C on at least two occasions); blood inflammatory response (C-reactive protein plasma concentration > 40 ml/L or white blood count > 18000/mm <sup>3</sup> ; or bacteriological evidence of infection in amniotic fluid obtained by amniocentesis |
| Elimian et al., 2000       | HC     | HC: Salafia et al. *2                                                                                                                                                                                                                                                                                                                                                                  |

\*1 HC: Histological chorioamnionitis ,CC: Clinical chorioamnionitis

\*2 Salafia CM, Weigl C, Silberman L. The prevalence and distribution of acute placental inflammation in uncomplicated term pregnancies. *Obstet Gynecol.* 1989;73(3 Pt 1):383-389.

\*3 Redline RW, Faye-Petersen O, Heller D, et al. Amniotic infection syndrome: nosology and reproducibility of placental reaction patterns. *Pediatr Dev Pathol.* 2003;6(5):435-448. doi:10.1007/s10024-003-7070-y.

\*4 Faye-Petersen O, Heller DS, Joshi VV. *Handbook of Placental Pathology.* Oxford: Taylor and Francis Medical Publishers; 2005. 142-52.

\*5 Bendon RW, Faye-Petersen O, Pavlova Z, et al. Histologic features of chorioamnion membrane rupture: development of methodology. *Pediatr Pathol Lab Med.* 1997;17(1):27-42.

Table 4-a: Characteristics of included studies for women with growth-restricted fetuses and/or small for gestational age infants

| Author, year                | Study design         | N (treatment, control)                                       | Study period | Location                 | Inclusion criteria                                                         | Exclusion criteria                                                                                                                                                                                 | FGR SGA    | Antenatal corticosteroid course |           |              |            |
|-----------------------------|----------------------|--------------------------------------------------------------|--------------|--------------------------|----------------------------------------------------------------------------|----------------------------------------------------------------------------------------------------------------------------------------------------------------------------------------------------|------------|---------------------------------|-----------|--------------|------------|
|                             |                      |                                                              |              |                          |                                                                            |                                                                                                                                                                                                    |            | Drug                            | Dose (mg) | Interval (h) | Repeat ACS |
| Bitar et al., 2020          | Retrospective cohort | Pregnant women=infants<br>247 (136, 111)                     | 2015–2019    | USA                      | Women giving birth between GA 34 weeks 0 days and 36 weeks 6 days          | Multiple gestations, mother age $\geq$ 18 years                                                                                                                                                    | SGA or FGR | Beta                            | NS        | NS           | NS         |
| Cartwright et al., 2019     | Retrospective cohort | Pregnant women<br>216 (118, 98)<br>Infants<br>261 (139, 122) | 1998–2004    | Australia<br>New Zealand | Women giving birth at GA < 32 weeks, single, twin, and triplet pregnancy   | Chorioamnionitis requiring urgent delivery, labor at the second stage, mature fetal lung development, and further steroid therapy                                                                  | SGA or FGR | Beta                            | 13.8      | NS           | Yes        |
| Kim WJ et al., 2018         | Retrospective cohort | Pregnant women=infants<br>82 (45, 37)                        | 2009–2016    | Republic of Korea        | Women giving birth between GA 29 weeks 0 days and 34 weeks 6 days          | Multiple gestations, still birth, major congenital abnormality, ACS administration within 24 h before births, ACS administration >7 days before birth                                              | SGA        | Dex                             | 5         | 12           | NS         |
| Kim YJ et al., 2018         | Retrospective cohort | Pregnant women=infants<br>91 (83, 8)                         | 2007–2014    | Republic of Korea        | Women giving birth between GA 23 weeks 0 days and 33 weeks 6 days          | Multiple gestations, major congenital abnormality, fetal hydrops, incomplete information, LGA, repeated ACS, transfer to other hospitals, SGA without fetal umbilical artery Doppler abnormalities | FGR or SGA | Beta/ Dex                       | NS        | 24/ 12       | No         |
| Riskin-Mashiah et al., 2018 | Retrospective cohort | Pregnant women=infants<br>784 (585,199)                      | 1995–2012    | Israel                   | Women giving birth to twins between GA 24 weeks 0 days and 31 weeks 6 days | Congenital anomalies                                                                                                                                                                               | SGA        | NS                              | NS        | NS           | NS         |
| Feng et al., 2017           | Retrospective cohort | Pregnant women<br>No data<br>Infants<br>602 (325, 277)       | 2013–2014    | China                    | Women giving birth between GA 24 weeks 0 days and 34 weeks 6 days          | Major congenital abnormality, inherited metabolic disease                                                                                                                                          | SGA        | Beta/ Dex                       | 12/ 5–6   | 24/ 12       | No         |
| Riskin-Mashiah et al., 2016 | Retrospective cohort | Pregnant women=infants<br>1771 (1246, 525)                   | 1995–2012    | Israel                   | Women giving birth between GA 24 weeks 0 days and 31 weeks 6 days          | Multiple gestations, congenital malformation, incomplete data                                                                                                                                      | SGA        | NS                              | NS        | NS           | NS         |
| Ishikawa et al., 2015       | Retrospective cohort | Pregnant women=infants<br>1929 (719, 1210)                   | 2003–2007    | Japan                    | Birth weight < 1500 g                                                      | Multiple gestations, Women giving birth $\geq$ 34 weeks, major congenital malformation, incomplete information, out-of-hospital birth                                                              | SGA        | NS                              | NS        | NS           | NS         |
| Mitsiakos et al., 2013      | Retrospective cohort | Pregnant women=infants<br>149 (87, 62)                       | NS           | Canada                   | Women giving birth between GA 24 weeks 0 days and 31 weeks 6 days          | Multiple gestations, congenital anomalies                                                                                                                                                          | SGA        | Beta                            | 12        | 24           | No         |

|                            |                      |                                                                         |           |             |                                                                                                                                                                                    |                                                                                                                                                                                |     |          |        |    |     |
|----------------------------|----------------------|-------------------------------------------------------------------------|-----------|-------------|------------------------------------------------------------------------------------------------------------------------------------------------------------------------------------|--------------------------------------------------------------------------------------------------------------------------------------------------------------------------------|-----|----------|--------|----|-----|
| van Stralen et al., 2009   | Retrospective cohort | Pregnant women=infants<br>88 (54,34)                                    | 2001–2005 | Netherlands | Birth weight < 1500 g                                                                                                                                                              | Multiple gestations, major congenital malformation or infection, incomplete information                                                                                        | FGR | Beta     | 11.4   | 24 | NS  |
| Torrance et al., 2007      | Retrospective cohort | Pregnant women<br>165 (146, 19)<br>FGR140 (112,28),<br>SGA165 (146, 19) | 1999–2003 | Netherlands | Women giving birth at GA < 34 weeks                                                                                                                                                | Congenital, chromosomal or syndromic abnormalities                                                                                                                             | SGA | Beta     | 12     | 24 | NS  |
| Faix-L'Helias et al., 2005 | Retrospective cohort | Pregnant women<br>No data<br>Infants<br>151 (96,55)                     | 1993–1996 | France      | Women giving birth between GA 24 weeks 0 days and 31 weeks 6 days                                                                                                                  | NS                                                                                                                                                                             | SGA | NS       | NS     | NS | NS  |
| Schaap et al., 2001        | Case-control         | Pregnant women=infants<br>124 (62,62)                                   | 1984–1991 | Netherlands | Women giving birth between GA 26 weeks 0 days and 31 weeks 6 days                                                                                                                  | ACS < 24 h before delivery, fetal death or fetal distress at admission to the hospital, abruptio placentae, lethal congenital abnormalities or infections, multiple gestations | FGR | Beta     | 12.5   | 24 | NS  |
| Bernstein et al., 2000*1   | Retrospective cohort | Pregnant women=infants<br>1258 (703,555)                                | 1991–1996 | USA, Canada | Women giving birth between GA 25 weeks 0 days and 30 weeks 6 days, white and African-American infants                                                                              | Multiple gestations, major anomalies                                                                                                                                           | SGA | NS       | NS     | NS | NS  |
| Elimian et al., 1999       | Retrospective cohort | Pregnant women<br>No data<br>Infants<br>220 (63,157)                    | 1990–1997 | USA         | Birth weight ≤ 1750 g                                                                                                                                                              | NS                                                                                                                                                                             | SGA | Beta     | 12     | 24 | Yes |
| Ley et al., 1997           | Retrospective cohort | Pregnant women<br>No data<br>Infants<br>234 (117, 117)                  | 1984–1985 | Sweden      | Women giving birth at GA < 33 weeks                                                                                                                                                | NS                                                                                                                                                                             | SGA | NS       | NS     | NS | NS  |
| Spinillo et al., 1995      | Prospective cohort   | Pregnant women<br>No data<br>Infants<br>96 (32,64)                      | 1988–1993 | Italy       | Women giving birth between GA 24 weeks 0 days and 34 weeks 6 days, indetermined or immature lecithin/sphingomyelin ratio, planned delivery with medication complications, liveborn | Congenital anomalies                                                                                                                                                           | SGA | Beta/Dex | 12/ 12 | NS | NS  |
| Lenardo et al., 1990       | Retrospective cohort | Pregnant women=infants<br>72 (15,57)                                    | NS        | Italy       | Women giving birth at GA ≤ 35 weeks                                                                                                                                                | Twin gestations                                                                                                                                                                | SGA | Beta     | 12     | 24 | NS  |

\*ACS: Antenatal corticosteroid, Beta: Betamethasone, Dex: Dexamethasone, FGR: Fetal growth restriction, GA: Gestational age, LGA: Large for gestational age, SGA: Small for gestational age, NS: Not stated

\*1: The data was obtained through personal communication.

Table 4-b: Diagnostic criteria on fetal growth restriction (FGR) from individual studies

| Author, year               | Diagnostic criteria on FGR                                                                                                                                                                                                                                                                                                             |
|----------------------------|----------------------------------------------------------------------------------------------------------------------------------------------------------------------------------------------------------------------------------------------------------------------------------------------------------------------------------------|
| Bitar et al.,<br>2020      | Identified by International Classification of Diseases, Tenth Revision (ICD-10) codes..                                                                                                                                                                                                                                                |
| Cartwright et al.,<br>2019 | Defined a priori as one or more of the following: obstetric diagnosis of FGR at trial entry; cesarean delivery for FGR; or customized birth weight of no greater than the third centile (GROW, version 6.7.8.3; Perinatal Institute).                                                                                                  |
| Kim YJ et al.,<br>2018     | Defined as any fetal growth restriction (estimated fetal weight <10th percentile) documented from serial maternal medical records or a birth weight of less than the 10th percetible based on the growth curve of Olsen et al. * <sup>1</sup> with absent or reverse umbilical artery end-diastolic flow in the fetal Doppler studies. |
| van Stralen et al,<br>2009 | Defined id at least one measurement of the U/C ratio was higher than 0.725. * <sup>2</sup><br>U:umbilical artery, C:middle cerebaral artery                                                                                                                                                                                            |
| Schaap et al,<br>2001      | Diagnosed by fundal height measurement and by sonographic fetal biometry. The FGR was due to placental dysfunction, as confirmed by pathological examination of placenta.                                                                                                                                                              |

\*1 Olsen IE, Groveman SA, Lawson ML, Clark RH, Zemel BS. New intrauterine growth curves based on United States data. *Pediatrics*. 2010;125(2):e214-e224. doi:10.1542/peds.2009-0913

\*2 Scherjon SA, Smolders-DeHaas H, Kok JH, Zondervan HA. The "brain-sparing" effect: antenatal cerebral Doppler findings in relation to neurologic outcome in very preterm infants. *Am J Obstet Gynecol*. 1993;169(1):169-175. doi:10.1016/0002-9378(93)90156-d
