# Supplementary material for: Antenatal corticosteroids in specific groups at risk of preterm birth: a systematic review
Source: PubMed Central journal article supplement — BMJ Open. 2023 Sep 22;13(9):e065070. doi: 10.1136/bmjopen-2022-065070 (PMC10533784; doi:10.1136/bmjopen-2022-065070), 2023-09-22
Supplement: bmjopen-2022-065070supp008.pdf [file bmjopen-2022-065070supp008.pdf]

**Supplementary table 4: Database-specific search terms and strategies****MEDLINE (via Ovid) 2021/6/6**

| #  | Searches                                                                                                                                                                                                                                                                                                                                                                                                                                    | Annotations |
|----|---------------------------------------------------------------------------------------------------------------------------------------------------------------------------------------------------------------------------------------------------------------------------------------------------------------------------------------------------------------------------------------------------------------------------------------------|-------------|
| 1  | exp *Adrenal Cortex Hormones/ad, tu                                                                                                                                                                                                                                                                                                                                                                                                         |             |
| 2  | exp *Adrenal Cortex Hormones/ and (ci or de or dt).fs.                                                                                                                                                                                                                                                                                                                                                                                      |             |
| 3  | exp Adrenal Cortex Hormones/ae, po, to                                                                                                                                                                                                                                                                                                                                                                                                      |             |
| 4  | or/1-3                                                                                                                                                                                                                                                                                                                                                                                                                                      |             |
| 5  | exp Pregnancy/                                                                                                                                                                                                                                                                                                                                                                                                                              |             |
| 6  | exp Pregnancy Outcome/                                                                                                                                                                                                                                                                                                                                                                                                                      |             |
| 7  | Fetal Death/                                                                                                                                                                                                                                                                                                                                                                                                                                |             |
| 8  | Maternal Death/                                                                                                                                                                                                                                                                                                                                                                                                                             |             |
| 9  | Obstetric Labor Complications/                                                                                                                                                                                                                                                                                                                                                                                                              |             |
| 10 | exp Obstetric Labor, Premature/                                                                                                                                                                                                                                                                                                                                                                                                             |             |
| 11 | Pregnancy, Prolonged/                                                                                                                                                                                                                                                                                                                                                                                                                       |             |
| 12 | Fetus/                                                                                                                                                                                                                                                                                                                                                                                                                                      |             |
| 13 | exp Infant, Newborn/                                                                                                                                                                                                                                                                                                                                                                                                                        |             |
| 14 | Prenatal Care/                                                                                                                                                                                                                                                                                                                                                                                                                              |             |
| 15 | exp Fetal Development/                                                                                                                                                                                                                                                                                                                                                                                                                      |             |
| 16 | exp Birth Weight/                                                                                                                                                                                                                                                                                                                                                                                                                           |             |
| 17 | Prenatal Exposure Delayed Effects/                                                                                                                                                                                                                                                                                                                                                                                                          |             |
| 18 | or/5-17                                                                                                                                                                                                                                                                                                                                                                                                                                     |             |
| 19 | 4 and 18                                                                                                                                                                                                                                                                                                                                                                                                                                    |             |
| 20 | limit 19 to (biography or case reports or comment or congresses or consensus development conference or consensus development conference, nih or editorial or guideline or historical article or interactivetutorial or interview or introductory journal article or lectures or news or newspaper article or overall or patient education handout or practice guideline or "review" or "scientific integrity review" or systematic reviews) |             |
| 21 | limit 20 to meta analysis                                                                                                                                                                                                                                                                                                                                                                                                                   |             |
| 22 | 20 not 21                                                                                                                                                                                                                                                                                                                                                                                                                                   |             |
| 23 | 19 not 22                                                                                                                                                                                                                                                                                                                                                                                                                                   |             |
| 24 | limit 23 to humans                                                                                                                                                                                                                                                                                                                                                                                                                          |             |
| 25 | (*corticosteroid" or *corticoid").mp.                                                                                                                                                                                                                                                                                                                                                                                                       |             |
| 26 | (pregnan* or labor or labour or gestation* or delivery* or preterm* or fetus or fetal or baby or babies or newborn* or neonat* or antenat* or prenat* or birth*).mp.                                                                                                                                                                                                                                                                        |             |
| 27 | 25 and 26                                                                                                                                                                                                                                                                                                                                                                                                                                   |             |
| 28 | MEDLINE.st.                                                                                                                                                                                                                                                                                                                                                                                                                                 |             |
| 29 | 27 not 28                                                                                                                                                                                                                                                                                                                                                                                                                                   |             |
| 30 | (biograph* or case report* or comment or congress* or conference* or editor* or tutorial* or interview* or lecture* or news* or handout* or guideline* or (review* not (meta analys* or metaanalys*))).mp.                                                                                                                                                                                                                                  |             |

|    |                                                                                                                                                                                                                                                                                                                                                                                                                                              |      |
|----|----------------------------------------------------------------------------------------------------------------------------------------------------------------------------------------------------------------------------------------------------------------------------------------------------------------------------------------------------------------------------------------------------------------------------------------------|------|
| 31 | 29 not 30                                                                                                                                                                                                                                                                                                                                                                                                                                    |      |
| 32 | exp Diabetes Mellitus/                                                                                                                                                                                                                                                                                                                                                                                                                       |      |
| 33 | exp Hyperglycemia/                                                                                                                                                                                                                                                                                                                                                                                                                           |      |
| 34 | or/32-33                                                                                                                                                                                                                                                                                                                                                                                                                                     |      |
| 35 | 34 and 18                                                                                                                                                                                                                                                                                                                                                                                                                                    |      |
| 36 | exp Diabetes, Gestational/                                                                                                                                                                                                                                                                                                                                                                                                                   |      |
| 37 | Pregnancy in Diabetics/                                                                                                                                                                                                                                                                                                                                                                                                                      |      |
| 38 | or/36-37                                                                                                                                                                                                                                                                                                                                                                                                                                     |      |
| 39 | or/5-17                                                                                                                                                                                                                                                                                                                                                                                                                                      |      |
| 40 | 38 and 39                                                                                                                                                                                                                                                                                                                                                                                                                                    |      |
| 41 | or/35,40                                                                                                                                                                                                                                                                                                                                                                                                                                     |      |
| 42 | 4 and 41                                                                                                                                                                                                                                                                                                                                                                                                                                     |      |
| 43 | limit 42 to (biography or case reports or comment or congresses or consensus development conference or consensus development conference, nih or editorial or guideline or historical article or interactive tutorial or interview or introductory journal article or lectures or news or newspaper article or overall or patient education handout or practice guideline or "review" or "scientific integrity review" or systematic reviews) |      |
| 44 | limit 43 to meta analysis                                                                                                                                                                                                                                                                                                                                                                                                                    |      |
| 45 | 43 not 44                                                                                                                                                                                                                                                                                                                                                                                                                                    |      |
| 46 | 42 not 45                                                                                                                                                                                                                                                                                                                                                                                                                                    |      |
| 47 | limit 46 to humans                                                                                                                                                                                                                                                                                                                                                                                                                           |      |
| 48 | diabet*.mp.                                                                                                                                                                                                                                                                                                                                                                                                                                  |      |
| 49 | 31 and 48                                                                                                                                                                                                                                                                                                                                                                                                                                    |      |
| 50 | or/47,49                                                                                                                                                                                                                                                                                                                                                                                                                                     |      |
| 51 | remove duplicates from 50                                                                                                                                                                                                                                                                                                                                                                                                                    |      |
| 52 | exp epidemiologic study/                                                                                                                                                                                                                                                                                                                                                                                                                     |      |
| 53 | (trial* or comparative or meta analysis or metaanalysis or multicenter or observational or randomized or randomised or rct or cct or cohort or cross sectional or longitudinal or evaluation or prospective or retrospective or control*).mp.                                                                                                                                                                                                |      |
| 54 | or/52-53                                                                                                                                                                                                                                                                                                                                                                                                                                     |      |
| 55 | 51 and 54                                                                                                                                                                                                                                                                                                                                                                                                                                    | P1-1 |
| 56 | 51 not 55                                                                                                                                                                                                                                                                                                                                                                                                                                    | P1-2 |
| 57 | exp Cesarean Section/                                                                                                                                                                                                                                                                                                                                                                                                                        |      |
| 58 | (cesarean or cesarian or caesarean or caesarian).mp.                                                                                                                                                                                                                                                                                                                                                                                         |      |
| 59 | or/57-58                                                                                                                                                                                                                                                                                                                                                                                                                                     |      |
| 60 | or/24,31                                                                                                                                                                                                                                                                                                                                                                                                                                     |      |
| 61 | 60 and 59                                                                                                                                                                                                                                                                                                                                                                                                                                    |      |
| 62 | remove duplicates from 61                                                                                                                                                                                                                                                                                                                                                                                                                    |      |
| 63 | 62 and 54                                                                                                                                                                                                                                                                                                                                                                                                                                    | P2-1 |
| 64 | 62 not 63                                                                                                                                                                                                                                                                                                                                                                                                                                    | P2-2 |
| 65 | exp "Bacterial Infections and Mycoses"/                                                                                                                                                                                                                                                                                                                                                                                                      |      |
| 66 | Pregnancy Complications, Infectious/                                                                                                                                                                                                                                                                                                                                                                                                         |      |

|    |                                                                                                           |      |
|----|-----------------------------------------------------------------------------------------------------------|------|
| 67 | or/65-66                                                                                                  |      |
| 68 | 24 and 67                                                                                                 |      |
| 69 | (infect* or chorioamnionitis).mp.                                                                         |      |
| 70 | 31 and 69                                                                                                 |      |
| 71 | or/68,70                                                                                                  |      |
| 72 | remove duplicates from 71                                                                                 |      |
| 73 | 72 and 54                                                                                                 | P3-1 |
| 74 | 72 not 73                                                                                                 | P3-2 |
| 75 | exp *Fetal Development/                                                                                   |      |
| 76 | (growth adj3 restrict*).mp.                                                                               |      |
| 77 | or/75-76                                                                                                  |      |
| 78 | 24 and 77                                                                                                 |      |
| 79 | ((fetal or fetus or baby or babies or restricted) adj3 (development or growth or maturity or weight)).mp. |      |
| 80 | 31 and 79                                                                                                 |      |
| 81 | or/78,80                                                                                                  |      |
| 82 | remove duplicates from 81                                                                                 |      |
| 83 | 82 and 54                                                                                                 | P4-1 |
| 84 | 82 not 83                                                                                                 | P4-2 |

**Embase** (via embase.com) 2021/6/6

| set | query                                                             | Annotations |
|-----|-------------------------------------------------------------------|-------------|
| #1  | 'corticosteroid'/exp/mj/dd_do,dd_cm,dd_dt,dd_ad,dd_to,dd_ct,dd_it |             |
| #2  | 'corticosteroid'/exp/dd_ae                                        |             |
| #3  | #1 OR #2                                                          |             |
| #4  | #3 AND 'human'/de                                                 |             |
| #5  | #4 AND [embase]/lim NOT [medline]/lim                             |             |
| #6  | 'parameters concerning the fetus, newborn and pregnancy'/exp      |             |
| #7  | 'fetus death'/exp                                                 |             |
| #8  | 'labor complication'/exp                                          |             |
| #9  | 'prolonged pregnancy'/de                                          |             |
| #10 | 'fetus'/de                                                        |             |
| #11 | 'newborn'/de                                                      |             |
| #12 | 'prenatal care'/exp                                               |             |
| #13 | 'prenatal development'/exp                                        |             |
| #14 | 'prenatal exposure'/de                                            |             |
| #15 | #6 OR #7 OR #8 OR #9 OR #10 OR #11 OR #12 OR #13 OR #14           |             |
| #16 | #5 AND #15                                                        |             |
| #17 | 'editorial'/de OR 'erratum'/exp OR 'note'/de OR 'review'/de       |             |
| #18 | 'meta analysis'/exp                                               |             |
| #19 | #17 NOT #18                                                       |             |
| #20 | #16 NOT #19                                                       |             |
| #21 | 'case report'/exp                                                 |             |
| #22 | #20 NOT #21                                                       |             |

|     |                               |    |
|-----|-------------------------------|----|
| #23 | 'diabetes mellitus'/exp       |    |
| #24 | 'hyperglycemia'/de            |    |
| #25 | #23 OR #24                    |    |
| #26 | #22 AND #25                   | P1 |
| #27 | 'cesarean section'/de         |    |
| #28 | #22 AND #27                   | P2 |
| #29 | 'infection'/exp               |    |
| #30 | 'chorioamnionitis'/de         |    |
| #31 | #29 OR #30                    |    |
| #32 | #22 AND #31                   | P3 |
| #33 | 'prenatal development'/exp/mj |    |
| #34 | #22 AND #33                   | P4 |

#### Cochrane Library (via Wiley) 2021/6/8

| ID  | Search                                                                                                                             | Annotations |
|-----|------------------------------------------------------------------------------------------------------------------------------------|-------------|
| #1  | MeSH descriptor: [Adrenal Cortex Hormones] explode all trees                                                                       |             |
| #2  | *corticosteroid* or *corticoid*                                                                                                    |             |
| #3  | #1 or #2                                                                                                                           |             |
| #4  | MeSH descriptor: [Pregnancy] explode all trees                                                                                     |             |
| #5  | pregnan* or labor or labour                                                                                                        |             |
| #6  | MeSH descriptor: [Pregnancy Outcome] explode all trees                                                                             |             |
| #7  | stillbirth or livebirth                                                                                                            |             |
| #8  | MeSH descriptor: [Fetal Death] explode all trees                                                                                   |             |
| #9  | MeSH descriptor: [Maternal Death] explode all trees                                                                                |             |
| #10 | MeSH descriptor: [Obstetric Labor, Premature] explode all trees                                                                    |             |
| #11 | MeSH descriptor: [Pregnancy, Prolonged] explode all trees                                                                          |             |
| #12 | MeSH descriptor: [Obstetric Labor Complications] this term only                                                                    |             |
| #13 | MeSH descriptor: [Fetus] this term only                                                                                            |             |
| #14 | fetus or fetal                                                                                                                     |             |
| #15 | MeSH descriptor: [Infant, Newborn] explode all trees                                                                               |             |
| #16 | infant* or newborn* or neonate* or baby or babies                                                                                  |             |
| #17 | MeSH descriptor: [Prenatal Care] explode all trees                                                                                 |             |
| #18 | prenatal or antenatal or perinatal                                                                                                 |             |
| #19 | MeSH descriptor: [Fetal Development] explode all trees                                                                             |             |
| #20 | matur* or immatur* or prematur*                                                                                                    |             |
| #21 | MeSH descriptor: [Birth Weight] explode all trees                                                                                  |             |
| #22 | MeSH descriptor: [Prenatal Exposure Delayed Effects] explode all trees                                                             |             |
| #23 | gestation* or birth* or offspring                                                                                                  |             |
| #24 | #4 or #5 or #6 or #7 or #8 or #9 or #10 or #11 or #12 or #13 or #14 or #15 or #16 or #17 or #18 or #19 or #20 or #21 or #22 or #23 |             |
| #25 | #3 and #24                                                                                                                         |             |
| #26 | MeSH descriptor: [Diabetes Mellitus] explode all trees                                                                             | P1          |
| #27 | diabet* or dm                                                                                                                      |             |

|     |                                                                          |    |
|-----|--------------------------------------------------------------------------|----|
| #28 | MeSH descriptor: [Hyperglycemia] explode all trees                       |    |
| #29 | hyperglycem*                                                             |    |
| #30 | MeSH descriptor: [Diabetes, Gestational] explode all trees               |    |
| #31 | MeSH descriptor: [Pregnancy in Diabetics] explode all trees              |    |
| #32 | #26 or #27 or #28 or #29 or #30 or #31                                   |    |
| #33 | #25 and #32                                                              |    |
| #34 | handsrch                                                                 |    |
| #35 | #33 and #34                                                              | P1 |
| #36 | MeSH descriptor: [Cesarean Section] explode all trees                    |    |
| #37 | cesarean or cesarian or caesarean or caesarian                           |    |
| #38 | #36 or #37                                                               |    |
| #39 | #25 and #38                                                              |    |
| #40 | #39 and #34                                                              | P2 |
| #41 | MeSH descriptor: [Bacterial Infections and Mycoses] explode all trees    |    |
| #42 | infect*                                                                  |    |
| #43 | MeSH descriptor: [Pregnancy Complications, Infectious] explode all trees |    |
| #44 | chorioamnionitis                                                         |    |
| #45 | #41 or #42 or #43 or #44                                                 |    |
| #46 | #25 and #45                                                              |    |
| #47 | #46 and #34                                                              | P3 |
| #48 | growth near restrict*                                                    |    |
| #49 | #25 and #48                                                              |    |
| #50 | #49 and #34                                                              | P4 |

## CINAHL (via EBSCOhost) 2021/6/6

| ID# | Search Terms                             | Search Options | Annotations |
|-----|------------------------------------------|----------------|-------------|
| S1  | (MM "Adrenal Cortex Hormones+/AD/DE/TU") |                |             |
| S2  | (MH "Adrenal Cortex Hormones+/AE")       |                |             |
| S3  | S1 or S2                                 |                |             |
| S4  | (MH "Pregnancy+")                        |                |             |
| S5  | (MH "Expectant Mothers")                 |                |             |
| S6  | (MH "Pregnancy Outcomes")                |                |             |
| S7  | (MH "Perinatal Death")                   |                |             |
| S8  | (MH "Maternal Mortality")                |                |             |
| S9  | (MH "Labor Complications+")              |                |             |
| S10 | (MH "Labor, Premature")                  |                |             |
| S11 | (MH "Pregnancy, Prolonged")              |                |             |
| S12 | (MH "Fetus+")                            |                |             |
| S13 | (MH "Infant, Newborn+")                  |                |             |
| S14 | (MH "Prenatal Care")                     |                |             |
| S15 | (MH "Fetal Development+")                |                |             |
| S16 | (MH "Birth Weight")                      |                |             |

|     |                                                                                          |                                                      |    |
|-----|------------------------------------------------------------------------------------------|------------------------------------------------------|----|
| S17 | (MH "Prenatal Exposure Delayed Effects")                                                 |                                                      |    |
| S18 | S4 or S5 or S6 or S7 or S8 or S9 or S10 or S11 or S12 or S13 or S14 or S15 or S16 or S17 |                                                      |    |
| S19 | S3 and S18                                                                               |                                                      |    |
| S20 | S19                                                                                      | Limiters - Human                                     |    |
| S21 | S20                                                                                      | Limiters - Research Article; Exclude MEDLINE records |    |
| S22 | (MH "Metabolic Diseases") OR (MH "Diabetes Mellitus+")                                   |                                                      |    |
| S23 | (MH "Hyperglycemia")                                                                     |                                                      |    |
| S24 | (MH "Pregnancy in Diabetes+")                                                            |                                                      |    |
| S25 | S22 or S23 or S24                                                                        |                                                      |    |
| S26 | S21 and S25                                                                              |                                                      | P1 |
| S27 | (MH "Cesarean Section+")                                                                 |                                                      |    |
| S28 | S21 and S27                                                                              |                                                      | P2 |
| S29 | (MH "Bacterial and Fungal Diseases+")                                                    |                                                      |    |
| S30 | S21 and S29                                                                              |                                                      | P3 |
| S31 | (MH "Fetal Development+")                                                                |                                                      |    |
| S32 | restrict* N3 (growth or development or matur*)                                           |                                                      |    |
| S33 | S31 or S32                                                                               |                                                      |    |
| S34 | S21 and S33                                                                              |                                                      | P4 |

**WHO Global Index Medicus** (via WHO-GIM site) 2021/6/8

|  | Search Terms                                                                                            | Annotations |
|--|---------------------------------------------------------------------------------------------------------|-------------|
|  | *cortico* AND (labor OR labour OR prematur* OR immatur* OR matur*) AND (diaebet* OR DM OR hyperglycem*) | P1          |
|  | *cortico* AND (labor OR labour OR prematur* OR immatur* OR matur*) AND (elective caesarean)             | P2          |
|  | *cortico* AND (labor OR labour OR prematur* OR immatur* OR matur*) AND (infect*)                        | P3          |
|  | *cortico* AND restrict* AND growth                                                                      | P4          |

**Web of Science Core Collection** (via Web of Science) 2021/6/8

| Set | Searches                                        | Annotations                  |
|-----|-------------------------------------------------|------------------------------|
| # 1 | CITED AUTHOR: (amiya r*) AND CITED YEAR: (2016) | Cited<br>Reference<br>Search |
