# Supplementary material for: Antenatal corticosteroids in specific groups at risk of preterm birth: a systematic review
Source: PubMed Central journal article supplement — BMJ Open. 2023 Sep 22;13(9):e065070. doi: 10.1136/bmjopen-2022-065070 (PMC10533784; doi:10.1136/bmjopen-2022-065070), 2023-09-22
Supplement: bmjopen-2022-065070supp010.pdf [file bmjopen-2022-065070supp010.pdf]

## Supplementary table 6: GRADE tables

Author(s): Kana Saito, Etsuko Nishimura, Toshiyuki Swa, Jenny Cao, Jenny Ramson, Fumihiko Namba, Erika Ota, Joshua P. Vogel

Question: Is antenatal corticosteroid therapy effective and safe for reducing adverse maternal and child outcomes in pregestational and/or gestational diabetic women?

Setting: 3 studies: 2 in the USA, 1 in Israel

| Certainty assessment                                               |                       |              |                      |              |                      |                      | No of patients  |                | Effect                            |                                                           | Certainty        | Importance |
|--------------------------------------------------------------------|-----------------------|--------------|----------------------|--------------|----------------------|----------------------|-----------------|----------------|-----------------------------------|-----------------------------------------------------------|------------------|------------|
| No of studies                                                      | Study design          | Risk of bias | Inconsistency        | Indirectness | Imprecision          | Other considerations | women with PGDM | placebo        | Relative (95% CI)                 | Absolute (95% CI)                                         |                  |            |
| <b>Caesarean section</b>                                           |                       |              |                      |              |                      |                      |                 |                |                                   |                                                           |                  |            |
| 2                                                                  | observational studies | not serious  | serious <sup>a</sup> | not serious  | serious <sup>a</sup> | none                 | 31/65 (47.7%)   | 58/150 (38.7%) | <b>OR 1.75</b><br>(0.63 to 4.82)  | <b>138 more per 1,000</b><br>(from 102 fewer to 366 more) | ⊕○○○<br>Very low |            |
| <b>Neonatal death within 48 hours of birth</b>                     |                       |              |                      |              |                      |                      |                 |                |                                   |                                                           |                  |            |
| 1                                                                  | observational studies | not serious  | not serious          | not serious  | serious <sup>a</sup> | none                 | 6/536 (1.1%)    | 2/79 (2.5%)    | <b>OR 0.44</b><br>(0.09 to 2.20)  | <b>14 fewer per 1,000</b><br>(from 23 fewer to 29 more)   | ⊕○○○<br>Very low |            |
| <b>Apgar score &lt;seven at 5 minutes</b>                          |                       |              |                      |              |                      |                      |                 |                |                                   |                                                           |                  |            |
| 1                                                                  | observational studies | not serious  | not serious          | not serious  | serious <sup>a</sup> | none                 | 1/47 (2.1%)     | 21/114 (18.4%) | <b>OR 0.79</b><br>(0.10 to 5.89)  | <b>33 fewer per 1,000</b><br>(from 162 fewer to 387 more) | ⊕○○○<br>Very low |            |
| <b>Respiratory distress syndrome (RDS) and moderate/severe RDS</b> |                       |              |                      |              |                      |                      |                 |                |                                   |                                                           |                  |            |
| 2                                                                  | observational studies | not serious  | serious <sup>a</sup> | not serious  | serious <sup>a</sup> | none                 | 179/583 (30.7%) | 37/193 (19.2%) | <b>OR 2.79</b><br>(0.85 to 9.08)  | <b>207 more per 1,000</b><br>(from 24 fewer to 491 more)  | ⊕○○○<br>Very low |            |
| <b>Neonatal hypoglycemia</b>                                       |                       |              |                      |              |                      |                      |                 |                |                                   |                                                           |                  |            |
| 2                                                                  | observational studies | not serious  | not serious          | not serious  | serious <sup>a</sup> | none                 | 14/65 (21.5%)   | 66/150 (44.0%) | <b>OR 1.44</b><br>(0.70 to 2.97)  | <b>91 more per 1,000</b><br>(from 85 fewer to 260 more)   | ⊕○○○<br>Very low |            |
| <b>Admission to neonatal intensive care unit</b>                   |                       |              |                      |              |                      |                      |                 |                |                                   |                                                           |                  |            |
| 1                                                                  | observational studies | not serious  | not serious          | not serious  | serious <sup>a</sup> | strong association   | 19/47 (40.4%)   | 36/114 (31.6%) | <b>OR 7.41</b><br>(5.04 to 10.89) | <b>458 more per 1,000</b><br>(from 384 more to 518 more)  | ⊕⊕○○<br>Low      |            |

CI: confidence interval; OR: odds ratio

## Explanations

- Heterogeneity is high (I-square=>60%).
- Estimate based on wide confidence interval crossing the line of no effect.
- Estimate based on small sample size.

Author(s): Kana Saito, Etsuko Nishimura, Toshiyuki Swa, Jenny Cao, Jenny Ramson, Fumihiko Namba, Erika Ota, Joshua P. Vogel

Question: Is antenatal corticosteroid therapy effective and safe for reducing adverse maternal and child outcomes in women undergoing elective cesarean birth in late preterm?

Setting: 2 studies: 1 in Israel, 1 in Spain

| Certainty assessment                                               |                       |              |               |              |                             |                      | No of patients                                    |                | Effect                      |                                                     | Certainty        | Importance |
|--------------------------------------------------------------------|-----------------------|--------------|---------------|--------------|-----------------------------|----------------------|---------------------------------------------------|----------------|-----------------------------|-----------------------------------------------------|------------------|------------|
| No of studies                                                      | Study design          | Risk of bias | Inconsistency | Indirectness | Imprecision                 | Other considerations | women with elective CS in the late preterm period | placebo        | Relative (95% CI)           | Absolute (95% CI)                                   |                  |            |
| <b>Hypertensive disorders</b>                                      |                       |              |               |              |                             |                      |                                                   |                |                             |                                                     |                  |            |
| 1                                                                  | observational studies | not serious  | not serious   | not serious  | very serious <sup>a,b</sup> | none                 | 3/58 (5.2%)                                       | 15/107 (14.0%) | OR 0.33<br>(0.09 to 1.21)   | 89 fewer per 1,000<br>(from 126 fewer to 25 more)   | ⊕○○○<br>Very low |            |
| <b>Gestational diabetes mellitus</b>                               |                       |              |               |              |                             |                      |                                                   |                |                             |                                                     |                  |            |
| 1                                                                  | observational studies | not serious  | not serious   | not serious  | very serious <sup>b,c</sup> | strong association   | 3/30 (10.0%)                                      | 4/10 (40.0%)   | OR 0.17<br>(0.03 to 0.95)   | 298 fewer per 1,000<br>(from 380 fewer to 12 fewer) | ⊕○○○<br>Very low |            |
| <b>Respiratory distress syndrome (RDS) and moderate/severe RDS</b> |                       |              |               |              |                             |                      |                                                   |                |                             |                                                     |                  |            |
| 2                                                                  | observational studies | not serious  | not serious   | not serious  | very serious <sup>a,b</sup> | none                 | 12/88 (13.6%)                                     | 11/117 (9.4%)  | OR 0.80<br>(0.29 to 2.24)   | 17 fewer per 1,000<br>(from 65 fewer to 95 more)    | ⊕○○○<br>Very low |            |
| <b>Use of mechanical ventilation</b>                               |                       |              |               |              |                             |                      |                                                   |                |                             |                                                     |                  |            |
| 2                                                                  | observational studies | not serious  | not serious   | not serious  | very serious <sup>a,b</sup> | none                 | 12/88 (13.6%)                                     | 11/117 (9.4%)  | OR 0.80<br>(0.30 to 2.12)   | 17 fewer per 1,000<br>(from 64 fewer to 86 more)    | ⊕○○○<br>Very low |            |
| <b>Admission to neonatal intensive care unit</b>                   |                       |              |               |              |                             |                      |                                                   |                |                             |                                                     |                  |            |
| 2                                                                  | observational studies | not serious  | not serious   | not serious  | very serious <sup>a,b</sup> | none                 | 10/88 (11.4%)                                     | 14/117 (12.0%) | OR 0.78<br>(0.23 to 2.72)   | 24 fewer per 1,000<br>(from 89 fewer to 150 more)   | ⊕○○○<br>Very low |            |
| <b>Neonatal hypoglycemia</b>                                       |                       |              |               |              |                             |                      |                                                   |                |                             |                                                     |                  |            |
| 2                                                                  | observational studies | not serious  | not serious   | not serious  | very serious <sup>a,b</sup> | none                 | 30/88 (34.1%)                                     | 37/117 (31.6%) | OR 1.50<br>(0.81 to 2.78)   | 93 more per 1,000<br>(from 44 fewer to 246 more)    | ⊕○○○<br>Very low |            |
| <b>Interventricular haemorrhage</b>                                |                       |              |               |              |                             |                      |                                                   |                |                             |                                                     |                  |            |
| 1                                                                  | observational studies | not serious  | not serious   | not serious  | very serious <sup>a,b</sup> | none                 | 0/58 (0.0%)                                       | 1/107 (0.9%)   | OR 0.61<br>(0.02 to 15.13)  | 4 fewer per 1,000<br>(from 9 fewer to 116 more)     | ⊕○○○<br>Very low |            |
| <b>Necrotizing enterocolitis</b>                                   |                       |              |               |              |                             |                      |                                                   |                |                             |                                                     |                  |            |
| 1                                                                  | observational studies | not serious  | not serious   | not serious  | very serious <sup>a,b</sup> | none                 | 0/58 (0.0%)                                       | 1/107 (0.9%)   | OR 0.61<br>(0.02 to 15.13)  | 4 fewer per 1,000<br>(from 9 fewer to 116 more)     | ⊕○○○<br>Very low |            |
| <b>Apgar score =<math>\leq</math>7 at 5minutes</b>                 |                       |              |               |              |                             |                      |                                                   |                |                             |                                                     |                  |            |
| 1                                                                  | observational studies | not serious  | not serious   | not serious  | very serious <sup>a,b</sup> | none                 | 2/58 (3.4%)                                       | 0/107 (0.0%)   | OR 9.51<br>(0.45 to 201.57) | 0 fewer per 1,000<br>(from 0 fewer to 0 fewer)      | ⊕○○○<br>Very low |            |
| <b>Mean duration of mechanical ventilation</b>                     |                       |              |               |              |                             |                      |                                                   |                |                             |                                                     |                  |            |

|   |                       |             |             |             |                        |      |    |    |   |                                             |                  |  |
|---|-----------------------|-------------|-------------|-------------|------------------------|------|----|----|---|---------------------------------------------|------------------|--|
| 1 | observational studies | not serious | not serious | not serious | serious <sup>a,b</sup> | none | 30 | 10 | - | MD 0.2 lower<br>(1.35 lower to 0.95 higher) | ⊕○○○<br>Very low |  |
|---|-----------------------|-------------|-------------|-------------|------------------------|------|----|----|---|---------------------------------------------|------------------|--|

**Oxygen requirement for at least 4 hours**

|   |                       |             |             |             |                             |      |               |                |                           |                                                   |                  |  |
|---|-----------------------|-------------|-------------|-------------|-----------------------------|------|---------------|----------------|---------------------------|---------------------------------------------------|------------------|--|
| 1 | observational studies | not serious | not serious | not serious | very serious <sup>a,b</sup> | none | 13/58 (22.4%) | 25/107 (23.4%) | OR 0.95<br>(0.44 to 2.03) | 9 fewer per 1,000<br>(from 115 fewer to 149 more) | ⊕○○○<br>Very low |  |
|---|-----------------------|-------------|-------------|-------------|-----------------------------|------|---------------|----------------|---------------------------|---------------------------------------------------|------------------|--|

CI: confidence interval; MD: mean difference; OR: odds ratio

**Explanations**

- a. Wide confidence interval crossing line of no effect; estimate based on small sample size.  
 b. Estimate based on small sample size.  
 c. The data were extracted from one study.

Author(s): Kana Saito, Etsuko Nishimura, Toshiyuki Swa, Jenny Cao, Jenny Ramson, Fumihiko Namba, Erika Ota, Joshua P. Vogel

Question: Is antenatal corticosteroid therapy effective and safe for reducing adverse maternal and child outcomes in women with chorioamnionitis?

Setting: 8 studies (observational studies in the USA, the Netherlands, France, and Republic of Korea)

| Certainty assessment                                                    |                       |              |                      |              |                               |                      | No of patients              |                 | Effect                            |                                                            | Certainty        | Importance |
|-------------------------------------------------------------------------|-----------------------|--------------|----------------------|--------------|-------------------------------|----------------------|-----------------------------|-----------------|-----------------------------------|------------------------------------------------------------|------------------|------------|
| No of studies                                                           | Study design          | Risk of bias | Inconsistency        | Indirectness | Imprecision                   | Other considerations | women with chorioamnionitis | placebo         | Relative (95% CI)                 | Absolute (95% CI)                                          |                  |            |
| <b>Caesarean section (HC)</b>                                           |                       |              |                      |              |                               |                      |                             |                 |                                   |                                                            |                  |            |
| 1                                                                       | observational studies | not serious  | not serious          | not serious  | very serious <sup>a,b</sup>   | none                 | 42/97 (43.3%)               | 2/12 (16.7%)    | <b>OR 3.82</b><br>(0.79 to 18.36) | <b>266 more per 1,000</b><br>(from 30 fewer to 619 more)   | ⊕○○○<br>Very low |            |
| <b>Gestational diabetes mellitus (HC)</b>                               |                       |              |                      |              |                               |                      |                             |                 |                                   |                                                            |                  |            |
| 1                                                                       | observational studies | not serious  | not serious          | not serious  | very serious <sup>a,b</sup>   | none                 | 6/97 (6.2%)                 | 2/12 (16.7%)    | <b>OR 0.33</b><br>(0.06 to 1.86)  | <b>105 fewer per 1,000</b><br>(from 155 fewer to 104 more) | ⊕○○○<br>Very low |            |
| <b>Preeclampsia or eclampsia (HC)</b>                                   |                       |              |                      |              |                               |                      |                             |                 |                                   |                                                            |                  |            |
| 1                                                                       | observational studies | not serious  | not serious          | not serious  | very serious <sup>a,b</sup>   | none                 | 5/97 (5.2%)                 | 1/12 (8.3%)     | <b>OR 0.60</b><br>(0.06 to 5.59)  | <b>32 fewer per 1,000</b><br>(from 78 fewer to 254 more)   | ⊕○○○<br>Very low |            |
| <b>Neonatal death (HC)</b>                                              |                       |              |                      |              |                               |                      |                             |                 |                                   |                                                            |                  |            |
| 6                                                                       | observational studies | not serious  | not serious          | not serious  | not serious                   | none                 | 63/677 (9.3%)               | 87/516 (16.9%)  | <b>OR 0.51</b><br>(0.31 to 0.85)  | <b>75 fewer per 1,000</b><br>(from 109 fewer to 22 fewer)  | ⊕⊕○○<br>Low      |            |
| <b>Neonatal death (CC)</b>                                              |                       |              |                      |              |                               |                      |                             |                 |                                   |                                                            |                  |            |
| 2                                                                       | observational studies | not serious  | not serious          | not serious  | very serious <sup>a,b,d</sup> | none                 | 14/109 (12.8%)              | 14/81 (17.3%)   | <b>OR 0.71</b><br>(0.32 to 1.60)  | <b>44 fewer per 1,000</b><br>(from 110 fewer to 78 more)   | ⊕○○○<br>Very low |            |
| <b>Death before discharge home (CC)</b>                                 |                       |              |                      |              |                               |                      |                             |                 |                                   |                                                            |                  |            |
| 1                                                                       | observational studies | not serious  | not serious          | not serious  | very serious <sup>a,b</sup>   | none                 | 7/45 (15.6%)                | 8/52 (15.4%)    | <b>OR 1.30</b><br>(0.13 to 13.44) | <b>37 more per 1,000</b><br>(from 131 fewer to 556 more)   | ⊕○○○<br>Very low |            |
| <b>Respiratory distress syndrome (RDS) and moderate/severe RDS (HC)</b> |                       |              |                      |              |                               |                      |                             |                 |                                   |                                                            |                  |            |
| 6                                                                       | observational studies | not serious  | not serious          | not serious  | not serious                   | none                 | 305/677 (45.1%)             | 289/516 (56.0%) | <b>OR 0.59</b><br>(0.45 to 0.77)  | <b>131 fewer per 1,000</b><br>(from 196 fewer to 65 fewer) | ⊕⊕○○<br>Low      |            |
| <b>Respiratory distress syndrome (RDS) and moderate/severe RDS (CC)</b> |                       |              |                      |              |                               |                      |                             |                 |                                   |                                                            |                  |            |
| 4                                                                       | observational studies | not serious  | not serious          | not serious  | serious <sup>a</sup>          | none                 | 99/209 (47.4%)              | 99/208 (47.6%)  | <b>OR 0.74</b><br>(0.48 to 1.12)  | <b>74 fewer per 1,000</b><br>(from 172 fewer to 28 more)   | ⊕○○○<br>Very low |            |
| <b>Surfactant use (HC)</b>                                              |                       |              |                      |              |                               |                      |                             |                 |                                   |                                                            |                  |            |
| 3                                                                       | observational studies | not serious  | serious <sup>a</sup> | not serious  | serious <sup>a</sup>          | none                 | 176/355 (49.6%)             | 236/402 (58.7%) | <b>OR 0.73</b><br>(0.32 to 1.65)  | <b>78 fewer per 1,000</b><br>(from 274 fewer to 114 more)  | ⊕○○○<br>Very low |            |

Severe interventricular haemorrhage (grade3-4) (HC)

|                                                               |                       |             |             |             |                             |                    |                 |                 |                            |                                                     |                  |  |
|---------------------------------------------------------------|-----------------------|-------------|-------------|-------------|-----------------------------|--------------------|-----------------|-----------------|----------------------------|-----------------------------------------------------|------------------|--|
| 4                                                             | observational studies | not serious | not serious | not serious | Serious <sup>b,d</sup>      | strong association | 25/414 (6.0%)   | 13/114 (11.4%)  | OR 0.41<br>(0.19 to 0.87)  | 64 fewer per 1,000<br>(from 90 fewer to 13 fewer)   | ⊕○○○<br>Very low |  |
| <b>Severe interventricular haemorrhage (grade3-4) (CC)</b>    |                       |             |             |             |                             |                    |                 |                 |                            |                                                     |                  |  |
| 3                                                             | observational studies | not serious | not serious | not serious | serious <sup>a</sup>        | none               | 5/163 (3.1%)    | 14/155 (9.0%)   | OR 0.32<br>(0.03 to 3.19)  | 60 fewer per 1,000<br>(from 87 fewer to 150 more)   | ⊕○○○<br>Very low |  |
| <b>Intraventricular haemorrhage (HC)</b>                      |                       |             |             |             |                             |                    |                 |                 |                            |                                                     |                  |  |
| 5                                                             | observational studies | not serious | not serious | not serious | serious <sup>b,d</sup>      | strong association | 42/502 (8.4%)   | 26/156 (16.7%)  | OR 0.41<br>(0.23 to 0.72)  | 91 fewer per 1,000<br>(from 123 fewer to 41 fewer)  | ⊕⊕○○<br>Low      |  |
| <b>Intraventricular haemorrhage (CC)</b>                      |                       |             |             |             |                             |                    |                 |                 |                            |                                                     |                  |  |
| 3                                                             | observational studies | not serious | not serious | not serious | serious <sup>a</sup>        | none               | 13/163 (8.0%)   | 20/155 (12.9%)  | OR 0.43<br>(0.07 to 2.44)  | 69 fewer per 1,000<br>(from 119 fewer to 136 more)  | ⊕○○○<br>Very low |  |
| <b>Early-onset sepsis (HC)</b>                                |                       |             |             |             |                             |                    |                 |                 |                            |                                                     |                  |  |
| 4                                                             | observational studies | not serious | not serious | not serious | serious <sup>a</sup>        | none               | 29/326 (8.9%)   | 9/122 (7.4%)    | OR 1.33<br>(0.39 to 4.56)  | 22 more per 1,000<br>(from 44 fewer to 193 more)    | ⊕○○○<br>Very low |  |
| <b>Early-onset sepsis (CC)</b>                                |                       |             |             |             |                             |                    |                 |                 |                            |                                                     |                  |  |
| 1                                                             | observational studies | not serious | not serious | not serious | very serious <sup>a,b</sup> | none               | 6/64 (9.4%)     | 1/29 (3.4%)     | OR 2.90<br>(0.33 to 25.23) | 59 more per 1,000<br>(from 23 fewer to 439 more)    | ⊕○○○<br>Very low |  |
| <b>Sepsis (HC)</b>                                            |                       |             |             |             |                             |                    |                 |                 |                            |                                                     |                  |  |
| 6                                                             | observational studies | not serious | not serious | not serious | serious <sup>a</sup>        | none               | 112/677 (16.5%) | 83/516 (16.1%)  | OR 1.03<br>(0.73 to 1.47)  | 4 more per 1,000<br>(from 38 fewer to 59 more)      | ⊕○○○<br>Very low |  |
| <b>Sepsis (CC)</b>                                            |                       |             |             |             |                             |                    |                 |                 |                            |                                                     |                  |  |
| 2                                                             | observational studies | not serious | not serious | not serious | very serious <sup>a,b</sup> | none               | 26/104 (25.0%)  | 12/46 (26.1%)   | OR 0.71<br>(0.13 to 3.89)  | 60 fewer per 1,000<br>(from 217 fewer to 318 more)  | ⊕○○○<br>Very low |  |
| <b>Patent ductus arteriosus (HC)</b>                          |                       |             |             |             |                             |                    |                 |                 |                            |                                                     |                  |  |
| 4                                                             | observational studies | not serious | not serious | not serious | serious <sup>a</sup>        | none               | 109/407 (26.8%) | 112/438 (25.6%) | OR 0.70<br>(0.46 to 1.07)  | 62 fewer per 1,000<br>(from 119 fewer to 13 more)   | ⊕○○○<br>Very low |  |
| <b>Patent ductus arteriosus (CC)</b>                          |                       |             |             |             |                             |                    |                 |                 |                            |                                                     |                  |  |
| 1                                                             | observational studies | not serious | not serious | not serious | very serious <sup>a,b</sup> | none               | 22/64 (34.4%)   | 13/29 (44.8%)   | OR 0.64<br>(0.26 to 1.58)  | 106 fewer per 1,000<br>(from 274 fewer to 114 more) | ⊕○○○<br>Very low |  |
| <b>Chronic lung disease / bronchopulmonary dysplasia (HC)</b> |                       |             |             |             |                             |                    |                 |                 |                            |                                                     |                  |  |

|                                                               |                       |             |             |             |                             |      |                |                 |                                  |                                                           |                  |  |
|---------------------------------------------------------------|-----------------------|-------------|-------------|-------------|-----------------------------|------|----------------|-----------------|----------------------------------|-----------------------------------------------------------|------------------|--|
| 4                                                             | observational studies | not serious | not serious | not serious | serious <sup>a</sup>        | none | 75/420 (17.9%) | 30/116 (25.9%)  | <b>OR 0.54</b><br>(0.27 to 1.10) | <b>100 fewer per 1,000</b><br>(from 173 fewer to 19 more) | ⊕○○○<br>Very low |  |
| <b>Chronic lung disease / bronchopulmonary dysplasia (CC)</b> |                       |             |             |             |                             |      |                |                 |                                  |                                                           |                  |  |
| 3                                                             | observational studies | not serious | not serious | not serious | very serious <sup>a,b</sup> | none | 34/149 (22.8%) | 24/98 (24.5%)   | <b>OR 0.91</b><br>(0.44 to 1.86) | <b>17 fewer per 1,000</b><br>(from 120 fewer to 131 more) | ⊕○○○<br>Very low |  |
| <b>Periventricular leukomalacia (HC)</b>                      |                       |             |             |             |                             |      |                |                 |                                  |                                                           |                  |  |
| 4                                                             | observational studies | not serious | not serious | not serious | serious <sup>a</sup>        | none | 18/414 (4.3%)  | 6/114 (5.3%)    | <b>OR 0.76</b><br>(0.27 to 2.12) | <b>12 fewer per 1,000</b><br>(from 38 fewer to 53 more)   | ⊕○○○<br>Very low |  |
| <b>Periventricular leukomalacia (CC)</b>                      |                       |             |             |             |                             |      |                |                 |                                  |                                                           |                  |  |
| 3                                                             | observational studies | not serious | not serious | not serious | serious <sup>a</sup>        | none | 8/163 (4.9%)   | 24/155 (15.5%)  | <b>OR 0.39</b><br>(0.08 to 1.90) | <b>88 fewer per 1,000</b><br>(from 140 fewer to 103 more) | ⊕○○○<br>Very low |  |
| <b>Mean duration of mechanical ventilation, days (HC)</b>     |                       |             |             |             |                             |      |                |                 |                                  |                                                           |                  |  |
| 1                                                             | observational studies | not serious | not serious | not serious | very serious <sup>a,b</sup> | none | 52             | 36              | -                                | <b>MD 2 lower</b><br>(4.23 lower to 0.23 higher)          | ⊕○○○<br>Very low |  |
| <b>Necrotizing enterocolitis (HC)</b>                         |                       |             |             |             |                             |      |                |                 |                                  |                                                           |                  |  |
| 5                                                             | observational studies | not serious | not serious | not serious | serious <sup>a</sup>        | none | 64/625 (10.2%) | 31/480 (6.5%)   | <b>OR 1.23</b><br>(0.72 to 2.10) | <b>14 more per 1,000</b><br>(from 17 fewer to 62 more)    | ⊕○○○<br>Very low |  |
| <b>Necrotizing enterocolitis (CC)</b>                         |                       |             |             |             |                             |      |                |                 |                                  |                                                           |                  |  |
| 2                                                             | observational studies | not serious | not serious | not serious | very serious <sup>a,b</sup> | none | 16/104 (15.4%) | 3/46 (6.5%)     | <b>OR 2.58</b><br>(0.70 to 9.55) | <b>87 more per 1,000</b><br>(from 19 fewer to 335 more)   | ⊕○○○<br>Very low |  |
| <b>Apgar score &lt;7 at 5 minutes (HC)</b>                    |                       |             |             |             |                             |      |                |                 |                                  |                                                           |                  |  |
| 1                                                             | observational studies | not serious | not serious | not serious | serious <sup>b,e</sup>      | none | 31/169 (18.3%) | 120/358 (33.5%) | <b>OR 0.45</b><br>(0.28 to 0.70) | <b>0 fewer per 1,000</b><br>(from 0 fewer to 0 fewer)     | ⊕○○○<br>Very low |  |
| <b>Use of mechanical ventilation (HC)</b>                     |                       |             |             |             |                             |      |                |                 |                                  |                                                           |                  |  |
| 1                                                             | observational studies | not serious | not serious | not serious | very serious <sup>a,b</sup> | none | 66/89 (74.2%)  | 29/32 (90.6%)   | <b>OR 0.30</b><br>(0.08 to 1.07) | <b>163 fewer per 1,000</b><br>(from 470 fewer to 6 more)  | ⊕○○○<br>Very low |  |
| <b>Use of mechanical ventilation (CC)</b>                     |                       |             |             |             |                             |      |                |                 |                                  |                                                           |                  |  |
| 1                                                             | observational studies | not serious | not serious | not serious | serious <sup>a</sup>        | none | 49/64 (76.6%)  | 29/29 (100.0%)  | <b>OR 0.05</b><br>(0.00 to 0.94) | <b>0 fewer per 1,000</b><br>(from 0 fewer to -)           | ⊕○○○<br>Very low |  |

Duration of oxygen use, days (HC)

|                                                            |                       |             |             |             |                             |      |                |               |                            |                                                      |                  |  |
|------------------------------------------------------------|-----------------------|-------------|-------------|-------------|-----------------------------|------|----------------|---------------|----------------------------|------------------------------------------------------|------------------|--|
| 1                                                          | observational studies | not serious | not serious | not serious | serious <sup>a</sup>        | none | 52             | 36            | -                          | MD 9 higher<br>(5.66 higher to 12.34 higher)         | ⊕○○○<br>Very low |  |
| <b>Hypotension within 7postnatal days (HC)</b>             |                       |             |             |             |                             |      |                |               |                            |                                                      |                  |  |
| 1                                                          | observational studies | not serious | not serious | not serious | serious <sup>a</sup>        | none | 9/97 (9.3%)    | 6/12 (50.0%)  | OR 0.08<br>(0.01 to 0.64)  | 426 fewer per 1,000<br>(from 490 fewer to 110 fewer) | ⊕○○○<br>Very low |  |
| <b>Retinopathy of prematurity requiring treatment (HC)</b> |                       |             |             |             |                             |      |                |               |                            |                                                      |                  |  |
| 1                                                          | observational studies | not serious | not serious | not serious | very serious <sup>a,b</sup> | none | 9/97 (9.3%)    | 2/12 (16.7%)  | OR 0.51<br>(0.10 to 2.71)  | 74 fewer per 1,000<br>(from 147 fewer to 185 more)   | ⊕○○○<br>Very low |  |
| <b>Discharge with respiratory support (HC)</b>             |                       |             |             |             |                             |      |                |               |                            |                                                      |                  |  |
| 1                                                          | observational studies | not serious | not serious | not serious | very serious <sup>a,b</sup> | none | 23/97 (23.7%)  | 4/12 (33.3%)  | OR 0.62<br>(0.17 to 2.25)  | 97 fewer per 1,000<br>(from 255 fewer to 196 more)   | ⊕○○○<br>Very low |  |
| <b>Systemic inflammatory response syndrome (HC)</b>        |                       |             |             |             |                             |      |                |               |                            |                                                      |                  |  |
| 1                                                          | observational studies | not serious | not serious | not serious | serious <sup>a</sup>        | none | 72/182 (39.6%) | 24/36 (66.7%) | OR 0.33<br>(0.15 to 0.70)  | 269 fewer per 1,000<br>(from 436 fewer to 83 fewer)  | ⊕○○○<br>Very low |  |
| <b>Systemic inflammatory response syndrome (CC)</b>        |                       |             |             |             |                             |      |                |               |                            |                                                      |                  |  |
| 1                                                          | observational studies | not serious | not serious | not serious | very serious <sup>a,b</sup> | none | 25/40 (62.5%)  | 11/17 (64.7%) | OR 0.91<br>(0.28 to 2.97)  | 22 fewer per 1,000<br>(from 308 fewer to 198 more)   | ⊕○○○<br>Very low |  |
| <b>Severe RDS (HC)</b>                                     |                       |             |             |             |                             |      |                |               |                            |                                                      |                  |  |
| 1                                                          | observational studies | not serious | not serious | not serious | very serious <sup>a,b</sup> | none | 16/89 (18.0%)  | 9/32 (28.1%)  | OR 0.56<br>(0.22 to 1.44)  | 102 fewer per 1,000<br>(from 202 fewer to 79 more)   | ⊕○○○<br>Very low |  |
| <b>Meningitis (HC)</b>                                     |                       |             |             |             |                             |      |                |               |                            |                                                      |                  |  |
| 1                                                          | observational studies | not serious | not serious | not serious | very serious <sup>a,b</sup> | none | 2/88 (2.3%)    | 0/42 (0.0%)   | OR 2.46<br>(0.12 to 52.32) | 0 fewer per 1,000<br>(from 0 fewer to 0 fewer)       | ⊕○○○<br>Very low |  |
| <b>Intrahepatic cholestasis (HC)</b>                       |                       |             |             |             |                             |      |                |               |                            |                                                      |                  |  |
| 1                                                          | observational studies | not serious | not serious | not serious | very serious <sup>a,b</sup> | none | 4/52 (7.7%)    | 6/36 (16.7%)  | OR 0.42<br>(0.11 to 1.60)  | 89 fewer per 1,000<br>(from 145 fewer to 76 more)    | ⊕○○○<br>Very low |  |
| <b>Pneumonia (HC)</b>                                      |                       |             |             |             |                             |      |                |               |                            |                                                      |                  |  |
| 1                                                          | observational studies | not serious | not serious | not serious | very serious <sup>a,b</sup> | none | 23/88 (26.1%)  | 5/42 (11.9%)  | OR 2.62<br>(0.92 to 7.47)  | 142 more per 1,000<br>(from 8 fewer to 383 more)     | ⊕○○○<br>Very low |  |

CI: confidence interval; MD: mean difference; OR: odds ratio

## Explanations

- a. Estimate based on wide confidence interval crossing the line of no effect.
- b. Estimate based on small sample size.
- c. Heterogeneity is high (I-square  $\geq$  60%).
- d. Wide difference of denominators between ACS and control group.
- e. The data were extracted from one study.



**Author(s):** Kana Saito, Etsuko Nishimura, Toshiyuki Swa, Jenny Cao, Jenny Ramson, Fumihiko Namba, Erika Ota, Joshua P. Vogel

**Question:** Is antenatal corticosteroid therapy effective and safe for reducing adverse maternal and child outcomes in women with growth-restricted fetuses and/or small-for-gestational age infants?

**Setting:** 18 studies (observational studies in Italy, the USA, France, Sweden, the Netherlands, Australia & New Zealand, Israel, Republic of Korea, and Japan)

| Certainty assessment                                                       |                       |              |               |              |             |                      | No of patients                       |                   | Effect                    |                                                    | Certainty        | Importance |
|----------------------------------------------------------------------------|-----------------------|--------------|---------------|--------------|-------------|----------------------|--------------------------------------|-------------------|---------------------------|----------------------------------------------------|------------------|------------|
| No of studies                                                              | Study design          | Risk of bias | Inconsistency | Indirectness | Imprecision | Other considerations | women with growth-restricted fetuses | placebo           | Relative (95% CI)         | Absolute (95% CI)                                  |                  |            |
| <b>Caesarean section (SGA)</b>                                             |                       |              |               |              |             |                      |                                      |                   |                           |                                                    |                  |            |
| 3                                                                          | observational studies | not serious  | not serious   | not serious  | serious*    | none                 | 774/851 (91.0%)                      | 1145/1309 (87.5%) | OR 1.35<br>(0.86 to 2.12) | 29 more per 1,000<br>(from 17 fewer to 62 more)    | ⊕○○○<br>Very low |            |
| <b>Chorioamnionitis (histologic and /or clinical) (SGA)</b>                |                       |              |               |              |             |                      |                                      |                   |                           |                                                    |                  |            |
| 4                                                                          | observational studies | not serious  | not serious   | not serious  | serious*    | none                 | 63/702 (9.0%)                        | 83/1094 (7.6%)    | OR 1.27<br>(0.70 to 2.30) | 19 more per 1,000<br>(from 22 fewer to 83 more)    | ⊕○○○<br>Very low |            |
| <b>Preeclampsia (SGA)</b>                                                  |                       |              |               |              |             |                      |                                      |                   |                           |                                                    |                  |            |
| 2                                                                          | observational studies | not serious  | not serious   | not serious  | not serious | none                 | 359/806 (44.5%)                      | 640/1271 (50.4%)  | OR 0.78<br>(0.66 to 0.94) | 62 fewer per 1,000<br>(from 103 fewer to 15 fewer) | ⊕○○○<br>Very low |            |
| <b>Gestational diabetes mellitus (SGA)</b>                                 |                       |              |               |              |             |                      |                                      |                   |                           |                                                    |                  |            |
| 2                                                                          | observational studies | not serious  | not serious   | not serious  | serious*    | none                 | 10/764 (1.3%)                        | 27/1247 (2.2%)    | OR 0.57<br>(0.27 to 1.19) | 9 fewer per 1,000<br>(from 16 fewer to 4 more)     | ⊕○○○<br>Very low |            |
| <b>Pregnancy induced hypertension (SGA)</b>                                |                       |              |               |              |             |                      |                                      |                   |                           |                                                    |                  |            |
| 2                                                                          | observational studies | not serious  | not serious   | not serious  | not serious | none                 | 144/370 (38.9%)                      | 94/314 (29.9%)    | OR 1.50<br>(1.08 to 2.07) | 91 more per 1,000<br>(from 16 more to 170 more)    | ⊕⊕○○<br>Low      |            |
| <b>Neonatal death (SGA)</b>                                                |                       |              |               |              |             |                      |                                      |                   |                           |                                                    |                  |            |
| 8                                                                          | observational studies | not serious  | not serious   | not serious  | not serious | none                 | 242/1544 (15.7%)                     | 196/1116 (17.6%)  | OR 0.68<br>(0.47 to 0.97) | 49 fewer per 1,000<br>(from 85 fewer to 4 fewer)   | ⊕⊕○○<br>Low      |            |
| <b>Death before discharge home (SGA)</b>                                   |                       |              |               |              |             |                      |                                      |                   |                           |                                                    |                  |            |
| 4                                                                          | observational studies | not serious  | serious*      | not serious  | not serious | none                 | 390/2746 (14.2%)                     | 386/2344 (16.5%)  | OR 0.62<br>(0.43 to 0.90) | 56 fewer per 1,000<br>(from 87 fewer to 14 fewer)  | ⊕○○○<br>Very low |            |
| <b>Respiratory distress syndrome (RDS) and moderate / severe RDS (SGA)</b> |                       |              |               |              |             |                      |                                      |                   |                           |                                                    |                  |            |
| 13                                                                         | observational studies | not serious  | not serious   | not serious  | not serious | none                 | -                                    | -                 | OR 0.86<br>(0.72 to 1.03) | 1 fewer per 1,000<br>(from 1 fewer to 1 fewer)     | ⊕○○○<br>Very low |            |
| <b>Surfactant use (SGA)</b>                                                |                       |              |               |              |             |                      |                                      |                   |                           |                                                    |                  |            |
| 2                                                                          | observational studies | not serious  | not serious   | not serious  | serious*    | none                 | 62/209 (29.7%)                       | 34/176 (19.3%)    | OR 1.66<br>(0.91 to 3.03) | 91 more per 1,000<br>(from 14 fewer to 227 more)   | ⊕○○○<br>Very low |            |
| <b>Major brain lesion (IVH, ICH, PVH, PVL) (SGA)</b>                       |                       |              |               |              |             |                      |                                      |                   |                           |                                                    |                  |            |

|   |                       |             |             |             |                             |      |   |   |                           |                                                |                  |  |
|---|-----------------------|-------------|-------------|-------------|-----------------------------|------|---|---|---------------------------|------------------------------------------------|------------------|--|
| 3 | observational studies | not serious | not serious | not serious | very serious <sup>a,b</sup> | none | - | - | OR 0.52<br>(0.20 to 1.34) | 1 fewer per 1,000<br>(from 1 fewer to 0 fewer) | ⊕○○○<br>Very low |  |
|---|-----------------------|-------------|-------------|-------------|-----------------------------|------|---|---|---------------------------|------------------------------------------------|------------------|--|

**Interventricular haemorrhage (SGA)**

|   |                       |             |                      |             |                      |      |                  |                  |                           |                                                 |                  |  |
|---|-----------------------|-------------|----------------------|-------------|----------------------|------|------------------|------------------|---------------------------|-------------------------------------------------|------------------|--|
| 8 | observational studies | not serious | serious <sup>a</sup> | not serious | serious <sup>a</sup> | none | 386/3592 (10.7%) | 378/2758 (13.7%) | OR 0.75<br>(0.53 to 1.06) | 31 fewer per 1,000<br>(from 59 fewer to 7 more) | ⊕○○○<br>Very low |  |
|---|-----------------------|-------------|----------------------|-------------|----------------------|------|------------------|------------------|---------------------------|-------------------------------------------------|------------------|--|

**Severe interventricular haemorrhage (grade3-4) (SGA)**

|   |                       |             |                      |             |             |      |                 |                  |                           |                                                   |                  |  |
|---|-----------------------|-------------|----------------------|-------------|-------------|------|-----------------|------------------|---------------------------|---------------------------------------------------|------------------|--|
| 7 | observational studies | not serious | serious <sup>a</sup> | not serious | not serious | none | 177/2873 (6.2%) | 162/1548 (10.5%) | OR 0.57<br>(0.37 to 0.86) | 42 fewer per 1,000<br>(from 63 fewer to 13 fewer) | ⊕○○○<br>Very low |  |
|---|-----------------------|-------------|----------------------|-------------|-------------|------|-----------------|------------------|---------------------------|---------------------------------------------------|------------------|--|

**Periventricular leukomalacia (SGA)**

|   |                       |             |             |             |             |      |                |                |                           |                                                  |                  |  |
|---|-----------------------|-------------|-------------|-------------|-------------|------|----------------|----------------|---------------------------|--------------------------------------------------|------------------|--|
| 4 | observational studies | not serious | not serious | not serious | not serious | none | 74/2219 (3.3%) | 68/1736 (3.9%) | OR 0.54<br>(0.38 to 0.77) | 18 fewer per 1,000<br>(from 24 fewer to 9 fewer) | ⊕○○○<br>Very low |  |
|---|-----------------------|-------------|-------------|-------------|-------------|------|----------------|----------------|---------------------------|--------------------------------------------------|------------------|--|

**Neonatal sepsis (SGA)**

|   |                       |             |             |             |                      |      |                  |                 |                           |                                                |                  |  |
|---|-----------------------|-------------|-------------|-------------|----------------------|------|------------------|-----------------|---------------------------|------------------------------------------------|------------------|--|
| 5 | observational studies | not serious | not serious | not serious | serious <sup>a</sup> | none | 128/1239 (10.3%) | 126/1743 (7.2%) | OR 1.28<br>(0.98 to 1.68) | 18 more per 1,000<br>(from 1 fewer to 43 more) | ⊕○○○<br>Very low |  |
|---|-----------------------|-------------|-------------|-------------|----------------------|------|------------------|-----------------|---------------------------|------------------------------------------------|------------------|--|

**Necrotizing enterocolitis (SGA)**

|   |                       |             |             |             |                      |      |                 |                 |                           |                                                |                  |  |
|---|-----------------------|-------------|-------------|-------------|----------------------|------|-----------------|-----------------|---------------------------|------------------------------------------------|------------------|--|
| 8 | observational studies | not serious | not serious | not serious | serious <sup>a</sup> | none | 238/3753 (6.3%) | 162/2961 (5.5%) | OR 0.84<br>(0.66 to 1.06) | 8 fewer per 1,000<br>(from 18 fewer to 3 more) | ⊕○○○<br>Very low |  |
|---|-----------------------|-------------|-------------|-------------|----------------------|------|-----------------|-----------------|---------------------------|------------------------------------------------|------------------|--|

**Patent ductus arteriosus (SGA)**

|   |                       |             |             |             |                      |      |                  |                  |                           |                                                |                  |  |
|---|-----------------------|-------------|-------------|-------------|----------------------|------|------------------|------------------|---------------------------|------------------------------------------------|------------------|--|
| 4 | observational studies | not serious | not serious | not serious | serious <sup>a</sup> | none | 315/1194 (26.4%) | 368/1706 (21.6%) | OR 1.22<br>(0.98 to 1.52) | 36 more per 1,000<br>(from 3 fewer to 79 more) | ⊕○○○<br>Very low |  |
|---|-----------------------|-------------|-------------|-------------|----------------------|------|------------------|------------------|---------------------------|------------------------------------------------|------------------|--|

**Chronic lung disease / bronchopulmonary dysplasia (SGA)**

|   |                       |             |             |             |             |      |                  |                  |                           |                                                 |                  |  |
|---|-----------------------|-------------|-------------|-------------|-------------|------|------------------|------------------|---------------------------|-------------------------------------------------|------------------|--|
| 7 | observational studies | not serious | not serious | not serious | not serious | none | 596/2835 (21.0%) | 389/2112 (18.4%) | OR 1.14<br>(0.89 to 1.46) | 21 more per 1,000<br>(from 17 fewer to 64 more) | ⊕○○○<br>Very low |  |
|---|-----------------------|-------------|-------------|-------------|-------------|------|------------------|------------------|---------------------------|-------------------------------------------------|------------------|--|

**Use of mechanical ventilation (SGA)**

|   |                       |             |                      |             |                             |      |                |               |                           |                                                  |                  |  |
|---|-----------------------|-------------|----------------------|-------------|-----------------------------|------|----------------|---------------|---------------------------|--------------------------------------------------|------------------|--|
| 2 | observational studies | not serious | serious <sup>a</sup> | not serious | very serious <sup>a,b</sup> | none | 89/191 (46.6%) | 25/56 (44.6%) | OR 1.03<br>(0.37 to 2.90) | 7 more per 1,000<br>(from 217 fewer to 254 more) | ⊕○○○<br>Very low |  |
|---|-----------------------|-------------|----------------------|-------------|-----------------------------|------|----------------|---------------|---------------------------|--------------------------------------------------|------------------|--|

**Apgar score < 7 at 5 minutes (SGA)**

|   |                       |             |             |             |                      |      |                |                |                           |                                                  |                  |  |
|---|-----------------------|-------------|-------------|-------------|----------------------|------|----------------|----------------|---------------------------|--------------------------------------------------|------------------|--|
| 3 | observational studies | not serious | not serious | not serious | serious <sup>a</sup> | none | 52/433 (12.0%) | 62/471 (13.2%) | OR 0.74<br>(0.51 to 1.09) | 31 fewer per 1,000<br>(from 60 fewer to 10 more) | ⊕○○○<br>Very low |  |
|---|-----------------------|-------------|-------------|-------------|----------------------|------|----------------|----------------|---------------------------|--------------------------------------------------|------------------|--|

## Apgar score &lt; 5 at 1 minute (SGA)

|   |                       |             |             |             |                            |      |                |               |                           |                                                  |                  |  |
|---|-----------------------|-------------|-------------|-------------|----------------------------|------|----------------|---------------|---------------------------|--------------------------------------------------|------------------|--|
| 2 | observational studies | not serious | not serious | not serious | very serious <sup>ab</sup> | none | 49/191 (25.7%) | 15/56 (26.8%) | OR 1.37<br>(0.63 to 2.97) | 66 more per 1,000<br>(from 81 fewer to 253 more) | ⊕○○○<br>Very low |  |
|---|-----------------------|-------------|-------------|-------------|----------------------------|------|----------------|---------------|---------------------------|--------------------------------------------------|------------------|--|

## Neonatal hypoglycemia (SGA)

|   |                       |             |             |             |                            |      |               |              |                           |                                                   |                  |  |
|---|-----------------------|-------------|-------------|-------------|----------------------------|------|---------------|--------------|---------------------------|---------------------------------------------------|------------------|--|
| 1 | observational studies | not serious | not serious | not serious | very serious <sup>ab</sup> | none | 17/45 (37.8%) | 8/37 (21.6%) | OR 2.20<br>(0.82 to 5.91) | 161 more per 1,000<br>(from 32 fewer to 404 more) | ⊕○○○<br>Very low |  |
|---|-----------------------|-------------|-------------|-------------|----------------------------|------|---------------|--------------|---------------------------|---------------------------------------------------|------------------|--|

## Gestational age at birth (SGA)

|   |                       |             |             |             |                      |      |     |      |   |                                             |                  |  |
|---|-----------------------|-------------|-------------|-------------|----------------------|------|-----|------|---|---------------------------------------------|------------------|--|
| 2 | observational studies | not serious | not serious | not serious | serious <sup>d</sup> | none | 806 | 1272 | - | MD 0.58 lower<br>(0.81 lower to 0.34 lower) | ⊕○○○<br>Very low |  |
|---|-----------------------|-------------|-------------|-------------|----------------------|------|-----|------|---|---------------------------------------------|------------------|--|

## Small for gestational age (&lt; 2.3rd percentile for gestational age) (SGA)

|   |                       |             |             |             |                            |      |                |               |                           |                                                    |                  |  |
|---|-----------------------|-------------|-------------|-------------|----------------------------|------|----------------|---------------|---------------------------|----------------------------------------------------|------------------|--|
| 1 | observational studies | not serious | not serious | not serious | very serious <sup>ab</sup> | none | 63/146 (43.2%) | 12/19 (63.2%) | OR 0.44<br>(0.16 to 1.19) | 202 fewer per 1,000<br>(from 416 fewer to 39 more) | ⊕○○○<br>Very low |  |
|---|-----------------------|-------------|-------------|-------------|----------------------------|------|----------------|---------------|---------------------------|----------------------------------------------------|------------------|--|

## Neonatal adrenal insufficiency (SGA)

|   |                       |             |             |             |                      |      |               |                |                           |                                                |                  |  |
|---|-----------------------|-------------|-------------|-------------|----------------------|------|---------------|----------------|---------------------------|------------------------------------------------|------------------|--|
| 1 | observational studies | not serious | not serious | not serious | serious <sup>a</sup> | none | 53/719 (7.4%) | 67/1210 (5.5%) | OR 1.36<br>(0.94 to 1.97) | 18 more per 1,000<br>(from 3 fewer to 48 more) | ⊕○○○<br>Very low |  |
|---|-----------------------|-------------|-------------|-------------|----------------------|------|---------------|----------------|---------------------------|------------------------------------------------|------------------|--|

## Cerebral palsy (SGA)

|   |                       |             |             |             |                      |      |               |               |                           |                                                 |                  |  |
|---|-----------------------|-------------|-------------|-------------|----------------------|------|---------------|---------------|---------------------------|-------------------------------------------------|------------------|--|
| 1 | observational studies | not serious | not serious | not serious | serious <sup>a</sup> | none | 19/278 (6.8%) | 25/498 (5.0%) | OR 1.39<br>(0.75 to 2.57) | 18 more per 1,000<br>(from 12 fewer to 69 more) | ⊕○○○<br>Very low |  |
|---|-----------------------|-------------|-------------|-------------|----------------------|------|---------------|---------------|---------------------------|-------------------------------------------------|------------------|--|

## Severe hearing impairment (SGA)

|   |                       |             |             |             |                      |      |              |              |                           |                                                 |                  |  |
|---|-----------------------|-------------|-------------|-------------|----------------------|------|--------------|--------------|---------------------------|-------------------------------------------------|------------------|--|
| 1 | observational studies | not serious | not serious | not serious | serious <sup>a</sup> | none | 0/277 (0.0%) | 5/502 (1.0%) | OR 0.16<br>(0.01 to 2.96) | 8 fewer per 1,000<br>(from 10 fewer to 19 more) | ⊕○○○<br>Very low |  |
|---|-----------------------|-------------|-------------|-------------|----------------------|------|--------------|--------------|---------------------------|-------------------------------------------------|------------------|--|

## Visual impairment (SGA)

|   |                       |             |             |             |                      |      |              |              |                           |                                                |                  |  |
|---|-----------------------|-------------|-------------|-------------|----------------------|------|--------------|--------------|---------------------------|------------------------------------------------|------------------|--|
| 1 | observational studies | not serious | not serious | not serious | serious <sup>a</sup> | none | 1/275 (0.4%) | 3/490 (0.6%) | OR 0.59<br>(0.06 to 5.72) | 3 fewer per 1,000<br>(from 6 fewer to 28 more) | ⊕○○○<br>Very low |  |
|---|-----------------------|-------------|-------------|-------------|----------------------|------|--------------|--------------|---------------------------|------------------------------------------------|------------------|--|

## Birth weight (SGA)

|   |                       |             |                      |             |                      |      |     |      |   |                                                 |                  |  |
|---|-----------------------|-------------|----------------------|-------------|----------------------|------|-----|------|---|-------------------------------------------------|------------------|--|
| 2 | observational studies | not serious | serious <sup>a</sup> | not serious | serious <sup>a</sup> | none | 806 | 1272 | - | MD 49.1 lower<br>(110.53 lower to 12.32 higher) | ⊕○○○<br>Very low |  |
|---|-----------------------|-------------|----------------------|-------------|----------------------|------|-----|------|---|-------------------------------------------------|------------------|--|

## Duration of hospital stay (SGA)

|   |                       |             |             |             |                            |      |    |    |   |                                            |                  |  |
|---|-----------------------|-------------|-------------|-------------|----------------------------|------|----|----|---|--------------------------------------------|------------------|--|
| 1 | observational studies | not serious | not serious | not serious | very serious <sup>ab</sup> | none | 87 | 62 | - | MD 4 lower<br>(17.43 lower to 9.43 higher) | ⊕○○○<br>Very low |  |
|---|-----------------------|-------------|-------------|-------------|----------------------------|------|----|----|---|--------------------------------------------|------------------|--|

CI: confidence interval; MD: mean difference; OR: odds ratio

## Explanations

- a. Estimate based on wide confidence interval crossing the line of no effect.
- b. Estimate based on small sample size.
- c. Heterogeneity is high (I-square=>60%).
- d. Estimate based on the risk of selection bias.

**Author(s):** Kana Saito, Etsuko Nishimura, Toshiyuki Swa, Jenny Cao, Jenny Ramson, Fumihiko Namba, Erika Ota, Joshua P. Vogel

**Question:** Women with growth-restricted fetuses compared to placebo for [health problem]

**Setting:** 18 studies (observational studies in Italy, the USA, France, Sweden, the Netherlands, Australia & New Zealand, Israel, Republic of Korea, and Japan)

| Certainty assessment                                                       |                       |              |               |              |                            |                      | No of patients                       |               | Effect                           |                                                           | Certainty        | Importance |
|----------------------------------------------------------------------------|-----------------------|--------------|---------------|--------------|----------------------------|----------------------|--------------------------------------|---------------|----------------------------------|-----------------------------------------------------------|------------------|------------|
| No of studies                                                              | Study design          | Risk of bias | Inconsistency | Indirectness | Imprecision                | Other considerations | women with growth-restricted fetuses | placebo       | Relative (95% CI)                | Absolute (95% CI)                                         |                  |            |
| <b>Neonatal death (FGR)</b>                                                |                       |              |               |              |                            |                      |                                      |               |                                  |                                                           |                  |            |
| 2                                                                          | observational studies | not serious  | not serious   | not serious  | very serious <sup>ab</sup> | none                 | 20/165 (12.1%)                       | 6/62 (9.7%)   | <b>OR 0.69</b><br>(0.26 to 1.81) | <b>28 fewer per 1,000</b><br>(from 70 fewer to 66 more)   | ⊕○○○<br>Very low |            |
| <b>Death before discharge home (FGR)</b>                                   |                       |              |               |              |                            |                      |                                      |               |                                  |                                                           |                  |            |
| 1                                                                          | observational studies | not serious  | not serious   | not serious  | very serious <sup>ab</sup> | none                 | 9/62 (14.5%)                         | 15/62 (24.2%) | <b>OR 0.53</b><br>(0.21 to 1.33) | <b>97 fewer per 1,000</b><br>(from 179 fewer to 56 more)  | ⊕○○○<br>Very low |            |
| <b>Respiratory distress syndrome (RDS) and moderate / severe RDS (FGR)</b> |                       |              |               |              |                            |                      |                                      |               |                                  |                                                           |                  |            |
| 3                                                                          | observational studies | not serious  | not serious   | not serious  | very serious <sup>ab</sup> | none                 | -                                    | -             | <b>OR 0.85</b><br>(0.57 to 1.26) | <b>1 fewer per 1,000</b><br>(from 1 fewer to 1 fewer)     | ⊕○○○<br>Very low |            |
| <b>Surfactant use (FGR)</b>                                                |                       |              |               |              |                            |                      |                                      |               |                                  |                                                           |                  |            |
| 1                                                                          | observational studies | not serious  | not serious   | not serious  | very serious <sup>ab</sup> | none                 | 19/53 (35.8%)                        | 13/34 (38.2%) | <b>OR 0.90</b><br>(0.37 to 2.20) | <b>25 fewer per 1,000</b><br>(from 196 fewer to 194 more) | ⊕○○○<br>Very low |            |
| <b>Major brain lesion (IVH, ICH, PVH, PVL) (FGR)</b>                       |                       |              |               |              |                            |                      |                                      |               |                                  |                                                           |                  |            |
| 2                                                                          | observational studies | not serious  | not serious   | not serious  | very serious <sup>ab</sup> | none                 | 12/116 (10.3%)                       | 10/96 (10.4%) | <b>OR 0.86</b><br>(0.35 to 2.10) | <b>13 fewer per 1,000</b><br>(from 65 fewer to 92 fewer)  | ⊕○○○<br>Very low |            |
| <b>Interventricular haemorrhage (FGR)</b>                                  |                       |              |               |              |                            |                      |                                      |               |                                  |                                                           |                  |            |
| 1                                                                          | observational studies | not serious  | not serious   | not serious  | very serious <sup>ab</sup> | none                 | 8/62 (12.9%)                         | 9/62 (14.5%)  | <b>OR 0.87</b><br>(0.31 to 2.43) | <b>16 fewer per 1,000</b><br>(from 95 fewer to 147 more)  | ⊕○○○<br>Very low |            |
| <b>Severe interventricular haemorrhage (grade3-4) (FGR)</b>                |                       |              |               |              |                            |                      |                                      |               |                                  |                                                           |                  |            |
| 1                                                                          | observational studies | not serious  | not serious   | not serious  | very serious <sup>ab</sup> | none                 | 8/62 (12.9%)                         | 9/62 (14.5%)  | <b>OR 0.87</b><br>(0.31 to 2.43) | <b>16 fewer per 1,000</b><br>(from 95 fewer to 147 more)  | ⊕○○○<br>Very low |            |
| <b>Neonatal sepsis (FGR)</b>                                               |                       |              |               |              |                            |                      |                                      |               |                                  |                                                           |                  |            |
| 2                                                                          | observational studies | not serious  | not serious   | not serious  | very serious <sup>ab</sup> | none                 | 45/115 (39.1%)                       | 36/96 (37.5%) | <b>OR 0.83</b><br>(0.44 to 1.58) | <b>43 fewer per 1,000</b><br>(from 166 fewer to 112 more) | ⊕○○○<br>Very low |            |
| <b>Necrotizing enterocolitis (FGR)</b>                                     |                       |              |               |              |                            |                      |                                      |               |                                  |                                                           |                  |            |
| 1                                                                          | observational studies | not serious  | not serious   | not serious  | very serious <sup>ab</sup> | none                 | 3/53 (5.7%)                          | 2/34 (5.9%)   | <b>OR 0.96</b><br>(0.15 to 6.07) | <b>2 fewer per 1,000</b><br>(from 50 fewer to 216 more)   | ⊕○○○<br>Very low |            |
| <b>Patent ductus arteriosus (FGR)</b>                                      |                       |              |               |              |                            |                      |                                      |               |                                  |                                                           |                  |            |

|                                                                     |                       |             |             |             |                            |                    |                |               |                                   |                                                            |                  |  |
|---------------------------------------------------------------------|-----------------------|-------------|-------------|-------------|----------------------------|--------------------|----------------|---------------|-----------------------------------|------------------------------------------------------------|------------------|--|
| 1                                                                   | observational studies | not serious | not serious | not serious | very serious <sup>ab</sup> | none               | 10/53 (18.9%)  | 6/34 (17.6%)  | <b>OR 1.09</b><br>(0.35 to 3.32)  | <b>13 more per 1,000</b><br>(from 107 fewer to 239 more)   | ⊕○○○<br>Very low |  |
| <b>Chronic lung disease / bronchopulmonary dysplasia (FGR)</b>      |                       |             |             |             |                            |                    |                |               |                                   |                                                            |                  |  |
| 2                                                                   | observational studies | not serious | not serious | not serious | very serious <sup>ab</sup> | none               | 22/115 (19.1%) | 23/96 (24.0%) | <b>OR 0.83</b><br>(0.42 to 1.63)  | <b>32 fewer per 1,000</b><br>(from 123 fewer to 100 more)  | ⊕○○○<br>Very low |  |
| <b>Duration of mechanical ventilation (FGR)</b>                     |                       |             |             |             |                            |                    |                |               |                                   |                                                            |                  |  |
| 2                                                                   | observational studies | not serious | not serious | not serious | very serious <sup>ab</sup> | none               | 115            | 96            | -                                 | <b>MD 1.09 higher</b><br>(0.86 lower to 3.05 higher)       | ⊕○○○<br>Very low |  |
| <b>Use of mechanical ventilation (FGR)</b>                          |                       |             |             |             |                            |                    |                |               |                                   |                                                            |                  |  |
| 2                                                                   | observational studies | not serious | not serious | not serious | very serious <sup>ab</sup> | none               | 61/115 (53.0%) | 45/96 (46.9%) | <b>OR 1.24</b><br>(0.72 to 2.14)  | <b>54 more per 1,000</b><br>(from 80 fewer to 185 more)    | ⊕○○○<br>Very low |  |
| <b>Hypotension (FGR)</b>                                            |                       |             |             |             |                            |                    |                |               |                                   |                                                            |                  |  |
| 1                                                                   | observational studies | not serious | not serious | not serious | very serious <sup>ab</sup> | none               | 15/53 (28.3%)  | 5/34 (14.7%)  | <b>OR 2.29</b><br>(0.75 to 7.03)  | <b>136 more per 1,000</b><br>(from 33 fewer to 401 more)   | ⊕○○○<br>Very low |  |
| <b>Growth &lt;10th percentile in early childhood (FGR)</b>          |                       |             |             |             |                            |                    |                |               |                                   |                                                            |                  |  |
| 1                                                                   | observational studies | not serious | not serious | not serious | serious <sup>b</sup>       | none               | 14/49 (28.6%)  | 3/42 (7.1%)   | <b>OR 5.20</b><br>(1.38 to 19.62) | <b>214 more per 1,000</b><br>(from 25 more to 530 more)    | ⊕○○○<br>Very low |  |
| <b>Abnormal behavior at long-term follow-up at school age (FGR)</b> |                       |             |             |             |                            |                    |                |               |                                   |                                                            |                  |  |
| 1                                                                   | observational studies | not serious | not serious | not serious | very serious <sup>ab</sup> | none               | 21/49 (42.9%)  | 19/42 (45.2%) | <b>OR 0.91</b><br>(0.40 to 2.08)  | <b>23 fewer per 1,000</b><br>(from 204 fewer to 180 more)  | ⊕○○○<br>Very low |  |
| <b>Death at long-term follow-up (school age) (FGR)</b>              |                       |             |             |             |                            |                    |                |               |                                   |                                                            |                  |  |
| 1                                                                   | observational studies | not serious | not serious | not serious | very serious <sup>ab</sup> | none               | 4/62 (6.5%)    | 5/62 (8.1%)   | <b>OR 0.79</b><br>(0.20 to 3.08)  | <b>16 fewer per 1,000</b><br>(from 63 fewer to 132 more)   | ⊕○○○<br>Very low |  |
| <b>Death or disability/handicap at 2yrs' corrected age (FGR)</b>    |                       |             |             |             |                            |                    |                |               |                                   |                                                            |                  |  |
| 1                                                                   | observational studies | not serious | not serious | not serious | serious <sup>a</sup>       | strong association | 11/62 (17.7%)  | 22/62 (35.5%) | <b>OR 0.39</b><br>(0.17 to 0.90)  | <b>178 fewer per 1,000</b><br>(from 269 fewer to 24 fewer) | ⊕⊕○○<br>Low      |  |

CI: confidence interval; MD: mean difference; OR: odds ratio

## Explanations

- a. Estimate based on wide confidence interval crossing the line of no effect.  
b. Estimate based on small sample size.

**Author(s):** Kana Saito, Etsuko Nishimura, Toshiyuki Swa, Jenny Cao, Jenny Ramson, Fumihiko Namba, Erika Ota, Joshua P. Vogel

**Question:** Women with growth-restricted fetuses compared to placebo for [health problem]

**Setting:** 18 studies (observational studies in Italy, the USA, France, Sweden, the Netherlands, Australia & New Zealand, Israel, Republic of Korea, and Japan)

| Certainty assessment                                                              |                       |                    |                      |              |                             |                      | No of patients                       |                | Effect                            |                                                            | Certainty        | Importance |
|-----------------------------------------------------------------------------------|-----------------------|--------------------|----------------------|--------------|-----------------------------|----------------------|--------------------------------------|----------------|-----------------------------------|------------------------------------------------------------|------------------|------------|
| No of studies                                                                     | Study design          | Risk of bias       | Inconsistency        | Indirectness | Imprecision                 | Other considerations | women with growth-restricted fetuses | placebo        | Relative (95% CI)                 | Absolute (95% CI)                                          |                  |            |
| <b>Caesarean section (FGR or SGA)</b>                                             |                       |                    |                      |              |                             |                      |                                      |                |                                   |                                                            |                  |            |
| 2                                                                                 | observational studies | not serious        | not serious          | not serious  | serious <sup>a</sup>        | none                 | 136/219 (62.1%)                      | 56/119 (47.1%) | <b>OR 1.02</b><br>(0.62 to 1.68)  | <b>5 more per 1,000</b><br>(from 115 fewer to 128 more)    | ⊕○○○<br>Very low |            |
| <b>Chorioamnionitis (histologic and /or clinical) (FGR or SGA)</b>                |                       |                    |                      |              |                             |                      |                                      |                |                                   |                                                            |                  |            |
| 1                                                                                 | observational studies | not serious        | not serious          | not serious  | very serious <sup>a,b</sup> | none                 | 19/83 (22.9%)                        | 2/8 (25.0%)    | <b>OR 0.89</b><br>(0.17 to 4.78)  | <b>21 fewer per 1,000</b><br>(from 196 fewer to 364 more)  | ⊕○○○<br>Very low |            |
| <b>Preeclampsia (FGR or SGA)</b>                                                  |                       |                    |                      |              |                             |                      |                                      |                |                                   |                                                            |                  |            |
| 2                                                                                 | observational studies | <u>not serious</u> | serious <sup>c</sup> | not serious  | serious <sup>a</sup>        | none                 | 78/254 (30.7%)                       | 52/209 (24.9%) | <b>OR 1.37</b><br>(0.33 to 5.61)  | <b>63 more per 1,000</b><br>(from 150 fewer to 401 more)   | ⊕○○○<br>Very low |            |
| <b>Gestational diabetes mellitus (FGR or SGA)</b>                                 |                       |                    |                      |              |                             |                      |                                      |                |                                   |                                                            |                  |            |
| 2                                                                                 | observational studies | not serious        | not serious          | not serious  | serious <sup>a</sup>        | none                 | 14/219 (6.4%)                        | 7/119 (5.9%)   | <b>OR 1.06</b><br>(0.36 to 3.08)  | <b>3 more per 1,000</b><br>(from 37 fewer to 103 more)     | ⊕○○○<br>Very low |            |
| <b>Pregnancy induced hypertension (FGR or SGA)</b>                                |                       |                    |                      |              |                             |                      |                                      |                |                                   |                                                            |                  |            |
| 1                                                                                 | observational studies | not serious        | not serious          | not serious  | very serious <sup>a,b</sup> | none                 | 51/83 (61.4%)                        | 5/8 (62.5%)    | <b>OR 0.96</b><br>(0.21 to 4.28)  | <b>10 fewer per 1,000</b><br>(from 366 fewer to 252 more)  | ⊕○○○<br>Very low |            |
| <b>Neonatal death (FGR or SGA)</b>                                                |                       |                    |                      |              |                             |                      |                                      |                |                                   |                                                            |                  |            |
| 1                                                                                 | observational studies | not serious        | not serious          | not serious  | very serious <sup>a,b</sup> | none                 | 9/83 (10.8%)                         | 2/8 (25.0%)    | <b>OR 0.36</b><br>(0.06 to 2.09)  | <b>143 fewer per 1,000</b><br>(from 230 fewer to 161 more) | ⊕○○○<br>Very low |            |
| <b>Respiratory distress syndrome (RDS) and moderate / severe RDS (FGR or SGA)</b> |                       |                    |                      |              |                             |                      |                                      |                |                                   |                                                            |                  |            |
| 3                                                                                 | observational studies | not serious        | not serious          | not serious  | serious <sup>a</sup>        | none                 | 77/358 (21.5%)                       | 74/241 (30.7%) | <b>OR 0.74</b><br>(0.51 to 1.07)  | <b>60 fewer per 1,000</b><br>(from 123 fewer to 15 more)   | ⊕○○○<br>Very low |            |
| <b>Surfactant use (FGR or SGA)</b>                                                |                       |                    |                      |              |                             |                      |                                      |                |                                   |                                                            |                  |            |
| 3                                                                                 | observational studies | not serious        | not serious          | not serious  | not serious                 | strong association   | 61/358 (17.0%)                       | 58/241 (24.1%) | <b>OR 0.38</b><br>(0.23 to 0.62)  | <b>133 fewer per 1,000</b><br>(from 173 fewer to 76 fewer) | ⊕⊕⊕○<br>Moderate |            |
| <b>Interventricular haemorrhage (FGR or SGA)</b>                                  |                       |                    |                      |              |                             |                      |                                      |                |                                   |                                                            |                  |            |
| 1                                                                                 | observational studies | not serious        | not serious          | not serious  | very serious <sup>a,b</sup> | none                 | 5/83 (6.0%)                          | 0/8 (0.0%)     | <b>OR 1.19</b><br>(0.06 to 23.46) | <b>0 fewer per 1,000</b><br>(from 0 fewer to 0 fewer)      | ⊕○○○<br>Very low |            |

**Severe interventricular haemorrhage (grade3-4) (FGR or SGA)**

|   |                       |             |             |             |                            |      |             |            |                                   |                                                       |                  |  |
|---|-----------------------|-------------|-------------|-------------|----------------------------|------|-------------|------------|-----------------------------------|-------------------------------------------------------|------------------|--|
| 1 | observational studies | not serious | not serious | not serious | very serious <sup>ab</sup> | none | 5/83 (6.0%) | 0/8 (0.0%) | <b>OR 1.19</b><br>(0.06 to 23.46) | <b>0 fewer per 1,000</b><br>(from 0 fewer to 0 fewer) | ⊕○○○<br>Very low |  |
|---|-----------------------|-------------|-------------|-------------|----------------------------|------|-------------|------------|-----------------------------------|-------------------------------------------------------|------------------|--|

**Neonatal sepsis (FGR or SGA)**

|   |                       |             |             |             |                            |      |               |             |                                  |                                                            |                  |  |
|---|-----------------------|-------------|-------------|-------------|----------------------------|------|---------------|-------------|----------------------------------|------------------------------------------------------------|------------------|--|
| 1 | observational studies | not serious | not serious | not serious | very serious <sup>ab</sup> | none | 18/83 (21.7%) | 3/8 (37.5%) | <b>OR 0.46</b><br>(0.10 to 2.12) | <b>159 fewer per 1,000</b><br>(from 318 fewer to 185 more) | ⊕○○○<br>Very low |  |
|---|-----------------------|-------------|-------------|-------------|----------------------------|------|---------------|-------------|----------------------------------|------------------------------------------------------------|------------------|--|

**Necrotizing enterocolitis (FGR or SGA)**

|   |                       |             |             |             |                            |      |             |             |                                  |                                                           |                  |  |
|---|-----------------------|-------------|-------------|-------------|----------------------------|------|-------------|-------------|----------------------------------|-----------------------------------------------------------|------------------|--|
| 1 | observational studies | not serious | not serious | not serious | very serious <sup>ab</sup> | none | 5/83 (6.0%) | 1/8 (12.5%) | <b>OR 0.45</b><br>(0.05 to 4.40) | <b>65 fewer per 1,000</b><br>(from 118 fewer to 261 more) | ⊕○○○<br>Very low |  |
|---|-----------------------|-------------|-------------|-------------|----------------------------|------|-------------|-------------|----------------------------------|-----------------------------------------------------------|------------------|--|

**Patent ductus arteriosus (FGR or SGA)**

|   |                       |             |             |             |                            |      |               |             |                                  |                                                         |                  |  |
|---|-----------------------|-------------|-------------|-------------|----------------------------|------|---------------|-------------|----------------------------------|---------------------------------------------------------|------------------|--|
| 1 | observational studies | not serious | not serious | not serious | very serious <sup>ab</sup> | none | 42/83 (50.6%) | 4/8 (50.0%) | <b>OR 1.02</b><br>(0.24 to 4.37) | <b>5 more per 1,000</b><br>(from 306 fewer to 314 more) | ⊕○○○<br>Very low |  |
|---|-----------------------|-------------|-------------|-------------|----------------------------|------|---------------|-------------|----------------------------------|---------------------------------------------------------|------------------|--|

**Chronic lung disease / bronchopulmonary dysplasia (FGR or SGA)**

|   |                       |             |             |             |                            |      |               |             |                                  |                                                           |                  |  |
|---|-----------------------|-------------|-------------|-------------|----------------------------|------|---------------|-------------|----------------------------------|-----------------------------------------------------------|------------------|--|
| 1 | observational studies | not serious | not serious | not serious | very serious <sup>ab</sup> | none | 23/83 (27.7%) | 3/8 (37.5%) | <b>OR 0.64</b><br>(0.14 to 2.89) | <b>98 fewer per 1,000</b><br>(from 298 fewer to 259 more) | ⊕○○○<br>Very low |  |
|---|-----------------------|-------------|-------------|-------------|----------------------------|------|---------------|-------------|----------------------------------|-----------------------------------------------------------|------------------|--|

**Use of mechanical ventilation (FGR or SGA)**

|   |                       |             |             |             |             |                    |                |                |                                  |                                                            |                  |  |
|---|-----------------------|-------------|-------------|-------------|-------------|--------------------|----------------|----------------|----------------------------------|------------------------------------------------------------|------------------|--|
| 2 | observational studies | not serious | not serious | not serious | not serious | strong association | 73/275 (26.5%) | 94/233 (40.3%) | <b>OR 0.42</b><br>(0.26 to 0.66) | <b>182 fewer per 1,000</b><br>(from 254 fewer to 95 fewer) | ⊕⊕⊕○<br>Moderate |  |
|---|-----------------------|-------------|-------------|-------------|-------------|--------------------|----------------|----------------|----------------------------------|------------------------------------------------------------|------------------|--|

**Apgar score < 7 at 5 minutes (FGR or SGA)**

|   |                       |             |             |             |                            |      |              |              |                                  |                                                        |                  |  |
|---|-----------------------|-------------|-------------|-------------|----------------------------|------|--------------|--------------|----------------------------------|--------------------------------------------------------|------------------|--|
| 1 | observational studies | not serious | not serious | not serious | very serious <sup>ab</sup> | none | 6/136 (4.4%) | 5/111 (4.5%) | <b>OR 0.98</b><br>(0.29 to 3.29) | <b>1 fewer per 1,000</b><br>(from 32 fewer to 89 more) | ⊕○○○<br>Very low |  |
|---|-----------------------|-------------|-------------|-------------|----------------------------|------|--------------|--------------|----------------------------------|--------------------------------------------------------|------------------|--|

**Neonatal hypoglycemia (FGR or SGA)**

|   |                       |             |             |             |                      |                    |                |                |                                  |                                                         |             |  |
|---|-----------------------|-------------|-------------|-------------|----------------------|--------------------|----------------|----------------|----------------------------------|---------------------------------------------------------|-------------|--|
| 1 | observational studies | not serious | not serious | not serious | serious <sup>a</sup> | strong association | 55/136 (40.4%) | 28/111 (25.2%) | <b>OR 2.01</b><br>(1.16 to 3.48) | <b>152 more per 1,000</b><br>(from 29 more to 288 more) | ⊕⊕○○<br>Low |  |
|---|-----------------------|-------------|-------------|-------------|----------------------|--------------------|----------------|----------------|----------------------------------|---------------------------------------------------------|-------------|--|

**Oxygen therapy (FGR or SGA)**

|   |                       |             |             |             |             |                    |                |                |                                  |                                                            |                  |  |
|---|-----------------------|-------------|-------------|-------------|-------------|--------------------|----------------|----------------|----------------------------------|------------------------------------------------------------|------------------|--|
| 2 | observational studies | not serious | not serious | not serious | not serious | strong association | 79/275 (28.7%) | 94/233 (40.3%) | <b>OR 0.48</b><br>(0.30 to 0.77) | <b>158 fewer per 1,000</b><br>(from 235 fewer to 61 fewer) | ⊕⊕⊕○<br>Moderate |  |
|---|-----------------------|-------------|-------------|-------------|-------------|--------------------|----------------|----------------|----------------------------------|------------------------------------------------------------|------------------|--|

**Gestational age at birth (FGR or SGA)**

|   |                       |             |                      |             |                      |      |     |     |   |                                                     |                  |  |
|---|-----------------------|-------------|----------------------|-------------|----------------------|------|-----|-----|---|-----------------------------------------------------|------------------|--|
| 2 | observational studies | not serious | serious <sup>a</sup> | not serious | serious <sup>a</sup> | none | 275 | 233 | - | <b>MD 0.43 higher</b><br>(0.54 lower to 1.4 higher) | ⊕○○○<br>Very low |  |
|---|-----------------------|-------------|----------------------|-------------|----------------------|------|-----|-----|---|-----------------------------------------------------|------------------|--|

**Retinopathy of prematurity (FGR or SGA)**



|                                                               |                       |             |             |             |                            |      |                 |                 |                                   |                                                          |                  |  |
|---------------------------------------------------------------|-----------------------|-------------|-------------|-------------|----------------------------|------|-----------------|-----------------|-----------------------------------|----------------------------------------------------------|------------------|--|
| 1                                                             | observational studies | not serious | not serious | not serious | very serious <sup>ab</sup> | none | 5/83 (6.0%)     | 0/8 (0.0%)      | <b>OR 1.19</b><br>(0.06 to 23.46) | <b>0 fewer per 1,000</b><br>(from 0 fewer to 0 fewer)    | ⊕○○○<br>Very low |  |
| <b>Neonatal adrenal insufficiency (FGR or SGA)</b>            |                       |             |             |             |                            |      |                 |                 |                                   |                                                          |                  |  |
| 1                                                             | observational studies | not serious | not serious | not serious | very serious <sup>ab</sup> | none | 4/83 (4.8%)     | 0/8 (0.0%)      | <b>OR 0.96</b><br>(0.05 to 19.45) | <b>0 fewer per 1,000</b><br>(from 0 fewer to 0 fewer)    | ⊕○○○<br>Very low |  |
| <b>Survival free from disability (FGR or SGA)</b>             |                       |             |             |             |                            |      |                 |                 |                                   |                                                          |                  |  |
| 1                                                             | observational studies | not serious | not serious | not serious | very serious <sup>ab</sup> | none | 108/144 (75.0%) | 91/126 (72.2%)  | <b>OR 1.15</b><br>(0.67 to 1.98)  | <b>27 more per 1,000</b><br>(from 87 fewer to 115 more)  | ⊕○○○<br>Very low |  |
| <b>Cerebral palsy (FGR or SGA)</b>                            |                       |             |             |             |                            |      |                 |                 |                                   |                                                          |                  |  |
| 1                                                             | observational studies | not serious | not serious | not serious | very serious <sup>ab</sup> | none | 6/139 (4.3%)    | 5/122 (4.1%)    | <b>OR 1.06</b><br>(0.31 to 3.55)  | <b>2 more per 1,000</b><br>(from 28 fewer to 91 more)    | ⊕○○○<br>Very low |  |
| <b>Birth weight (g) (FGR or SGA)</b>                          |                       |             |             |             |                            |      |                 |                 |                                   |                                                          |                  |  |
| 2                                                             | observational studies | not serious | not serious | not serious | serious <sup>a</sup>       | none | 275             | 233             | -                                 | <b>MD 80.97 higher</b><br>(20.48 lower to 182.41 higher) | ⊕○○○<br>Very low |  |
| <b>Admission to neonatal intensive care unit (FGR or SGA)</b> |                       |             |             |             |                            |      |                 |                 |                                   |                                                          |                  |  |
| 1                                                             | observational studies | not serious | not serious | not serious | very serious <sup>ab</sup> | none | 131/136 (96.3%) | 107/111 (96.4%) | <b>OR 0.98</b><br>(0.26 to 3.74)  | <b>1 fewer per 1,000</b><br>(from 90 fewer to 26 more)   | ⊕○○○<br>Very low |  |
| <b>Duration of hospital stay (FGR or SGA)</b>                 |                       |             |             |             |                            |      |                 |                 |                                   |                                                          |                  |  |
| 1                                                             | observational studies | not serious | not serious | not serious | serious <sup>a</sup>       | none | 136             | 111             | -                                 | <b>MD 2.3 lower</b><br>(3.8 lower to 0.8 lower)          | ⊕○○○<br>Very low |  |

CI: confidence interval; MD: mean difference; OR: odds ratio

## Explanations

- Estimate based on wide confidence interval crossing the line of no effect.
- Estimate based on small sample size.
- Heterogeneity is high (I-square=>60%).

**Author(s):** Kana Saito, Etsuko Nishimura, Toshiyuki Swa, Jenny Cao, Jenny Ramson, Fumihiko Namba, Erika Ota, Joshua P. Vogel

**Question:** Women with growth-restricted fetuses compared to placebo for [health problem]

**Setting:** 18 studies (observational studies in Italy, the USA, France, Sweden, the Netherlands, Australia & New Zealand, Israel, Republic of Korea, and Japan)

| Certainty assessment                                          |                       |              |                      |              |                             |                      | No of patients                       |                   | Effect                           |                                                          | Certainty        | Importance |
|---------------------------------------------------------------|-----------------------|--------------|----------------------|--------------|-----------------------------|----------------------|--------------------------------------|-------------------|----------------------------------|----------------------------------------------------------|------------------|------------|
| No of studies                                                 | Study design          | Risk of bias | Inconsistency        | Indirectness | Imprecision                 | Other considerations | women with growth-restricted fetuses | placebo           | Relative (95% CI)                | Absolute (95% CI)                                        |                  |            |
| <b>Caesarean section (total)</b>                              |                       |              |                      |              |                             |                      |                                      |                   |                                  |                                                          |                  |            |
| 5                                                             | observational studies | not serious  | not serious          | not serious  | serious <sup>a</sup>        | none                 | 910/1070 (85.0%)                     | 1201/1428 (84.1%) | <b>OR 1.31</b><br>(0.99 to 1.74) | <b>33 more per 1,000</b><br>(from 1 fewer to 61 more)    | ⊕○○○<br>Very low |            |
| <b>Chorioamnionitis (histologic and /or clinical) (total)</b> |                       |              |                      |              |                             |                      |                                      |                   |                                  |                                                          |                  |            |
| 5                                                             | observational studies | not serious  | not serious          | not serious  | serious <sup>a</sup>        | none                 | 82/785 (10.4%)                       | 85/1102 (7.7%)    | <b>OR 1.28</b><br>(0.79 to 2.06) | <b>20 more per 1,000</b><br>(from 15 fewer to 70 more)   | ⊕○○○<br>Very low |            |
| <b>Preeclampsia (total)</b>                                   |                       |              |                      |              |                             |                      |                                      |                   |                                  |                                                          |                  |            |
| 4                                                             | observational studies | not serious  | serious <sup>a</sup> | not serious  | serious <sup>a</sup>        | none                 | 437/1060 (41.2%)                     | 692/1480 (46.8%)  | <b>OR 0.99</b><br>(0.57 to 1.71) | <b>3 fewer per 1,000</b><br>(from 134 fewer to 133 more) | ⊕○○○<br>Very low |            |
| <b>Gestational diabetes mellitus (total)</b>                  |                       |              |                      |              |                             |                      |                                      |                   |                                  |                                                          |                  |            |
| 4                                                             | observational studies | not serious  | not serious          | not serious  | serious <sup>a</sup>        | none                 | 24/983 (2.4%)                        | 34/1366 (2.5%)    | <b>OR 0.73</b><br>(0.41 to 1.31) | <b>7 fewer per 1,000</b><br>(from 15 fewer to 7 more)    | ⊕○○○<br>Very low |            |
| <b>Pregnancy induced hypertension (total)</b>                 |                       |              |                      |              |                             |                      |                                      |                   |                                  |                                                          |                  |            |
| 3                                                             | observational studies | not serious  | not serious          | not serious  | not serious                 | none                 | 195/453 (43.0%)                      | 99/322 (30.7%)    | <b>OR 1.47</b><br>(1.07 to 2.01) | <b>87 more per 1,000</b><br>(from 15 more to 164 more)   | ⊕⊕○○<br>Low      |            |
| <b>Death before discharge home (total)</b>                    |                       |              |                      |              |                             |                      |                                      |                   |                                  |                                                          |                  |            |
| 5                                                             | observational studies | not serious  | serious <sup>a</sup> | not serious  | not serious                 | none                 | 399/2808 (14.2%)                     | 401/2406 (16.7%)  | <b>OR 0.61</b><br>(0.44 to 0.85) | <b>58 fewer per 1,000</b><br>(from 86 fewer to 21 fewer) | ⊕○○○<br>Very low |            |
| <b>Major brain lesion (IVH, ICH, PVH, PVL) (total)</b>        |                       |              |                      |              |                             |                      |                                      |                   |                                  |                                                          |                  |            |
| 5                                                             | observational studies | not serious  | not serious          | not serious  | very serious <sup>a,b</sup> | none                 | -                                    | -                 | <b>OR 0.66</b><br>(0.37 to 1.16) | <b>1 fewer per 1,000</b><br>(from 1 fewer to 0 fewer)    | ⊕○○○<br>Very low |            |
| <b>Interventricular haemorrhage (total)</b>                   |                       |              |                      |              |                             |                      |                                      |                   |                                  |                                                          |                  |            |
| 10                                                            | observational studies | not serious  | not serious          | not serious  | serious <sup>a</sup>        | none                 | 399/3737 (10.7%)                     | 387/2828 (13.7%)  | <b>OR 0.76</b><br>(0.56 to 1.04) | <b>29 fewer per 1,000</b><br>(from 55 fewer to 5 more)   | ⊕○○○<br>Very low |            |
| <b>Severe interventricular haemorrhage (grade3-4) (total)</b> |                       |              |                      |              |                             |                      |                                      |                   |                                  |                                                          |                  |            |
| 9                                                             | observational studies | not serious  | not serious          | not serious  | not serious                 | none                 | 190/3018 (6.3%)                      | 171/1618 (10.6%)  | <b>OR 0.59</b><br>(0.41 to 0.85) | <b>41 fewer per 1,000</b><br>(from 59 fewer to 14 fewer) | ⊕⊕○○<br>Low      |            |
| <b>Neonatal sepsis (total)</b>                                |                       |              |                      |              |                             |                      |                                      |                   |                                  |                                                          |                  |            |

|                                                                  |                       |             |             |             |             |                    |                  |                  |                           |                                                  |                  |  |
|------------------------------------------------------------------|-----------------------|-------------|-------------|-------------|-------------|--------------------|------------------|------------------|---------------------------|--------------------------------------------------|------------------|--|
| 8                                                                | observational studies | not serious | not serious | not serious | serious*    | none               | 191/1437 (13.3%) | 165/1847 (8.9%)  | OR 1.17<br>(0.92 to 1.50) | 14 more per 1,000<br>(from 7 fewer to 39 more)   | ⊕○○○<br>Very low |  |
| <b>Necrotizing enterocolitis (total)</b>                         |                       |             |             |             |             |                    |                  |                  |                           |                                                  |                  |  |
| 10                                                               | observational studies | not serious | not serious | not serious | serious*    | none               | 246/3889 (6.3%)  | 165/3003 (5.5%)  | OR 0.82<br>(0.67 to 1.01) | 9 fewer per 1,000<br>(from 17 fewer to 1 more)   | ⊕○○○<br>Very low |  |
| <b>Patent ductus arteriosus (total)</b>                          |                       |             |             |             |             |                    |                  |                  |                           |                                                  |                  |  |
| 6                                                                | observational studies | not serious | not serious | not serious | not serious | none               | 367/1330 (27.6%) | 378/1748 (21.6%) | OR 1.19<br>(1.00 to 1.42) | 31 more per 1,000<br>(from 0 fewer to 65 more)   | ⊕○○○<br>Very low |  |
| <b>Chronic lung disease / bronchopulmonary dysplasia (total)</b> |                       |             |             |             |             |                    |                  |                  |                           |                                                  |                  |  |
| 10                                                               | observational studies | not serious | not serious | not serious | not serious | none               | 641/3033 (21.1%) | 415/2216 (18.7%) | OR 1.11<br>(0.90 to 1.38) | 16 more per 1,000<br>(from 16 fewer to 54 more)  | ⊕○○○<br>Very low |  |
| <b>Apgar score &lt; 7 at 5 minutes (total)</b>                   |                       |             |             |             |             |                    |                  |                  |                           |                                                  |                  |  |
| 4                                                                | observational studies | not serious | not serious | not serious | serious*    | none               | 58/569 (10.2%)   | 67/582 (11.5%)   | OR 0.76<br>(0.53 to 1.10) | 25 fewer per 1,000<br>(from 51 fewer to 10 more) | ⊕○○○<br>Very low |  |
| <b>Neonatal hypoglycemia (total)</b>                             |                       |             |             |             |             |                    |                  |                  |                           |                                                  |                  |  |
| 2                                                                | observational studies | not serious | not serious | not serious | not serious | strong association | 72/181 (39.8%)   | 36/148 (24.3%)   | OR 2.06<br>(1.27 to 3.32) | 155 more per 1,000<br>(from 47 more to 273 more) | ⊕⊕⊕○<br>Moderate |  |
| <b>Gestational age at birth (total)</b>                          |                       |             |             |             |             |                    |                  |                  |                           |                                                  |                  |  |
| 4                                                                | observational studies | not serious | serious*    | not serious | serious*    | none               | 1081             | 1505             | -                         | MD 0.04 lower<br>(0.57 lower to 0.48 higher)     | ⊕○○○<br>Very low |  |
| <b>Retinopathy of prematurity (total)</b>                        |                       |             |             |             |             |                    |                  |                  |                           |                                                  |                  |  |
| 5                                                                | observational studies | not serious | not serious | not serious | serious*    | none               | 135/1978 (6.8%)  | 44/832 (5.3%)    | OR 1.13<br>(0.79 to 1.61) | 6 more per 1,000<br>(from 11 fewer to 30 more)   | ⊕○○○<br>Very low |  |
| <b>Neonatal adrenal insufficiency (total)</b>                    |                       |             |             |             |             |                    |                  |                  |                           |                                                  |                  |  |
| 2                                                                | observational studies | not serious | not serious | not serious | serious*    | none               | 57/802 (7.1%)    | 67/1218 (5.5%)   | OR 1.35<br>(0.93 to 1.96) | 18 more per 1,000<br>(from 4 fewer to 47 more)   | ⊕○○○<br>Very low |  |
| <b>Cerebral palsy (total)</b>                                    |                       |             |             |             |             |                    |                  |                  |                           |                                                  |                  |  |
| 2                                                                | observational studies | not serious | not serious | not serious | serious*    | none               | 25/417 (6.0%)    | 30/620 (4.8%)    | OR 1.31<br>(0.76 to 2.27) | 14 more per 1,000<br>(from 11 fewer to 55 more)  | ⊕○○○<br>Very low |  |
| <b>Duration of hospital stay (total)</b>                         |                       |             |             |             |             |                    |                  |                  |                           |                                                  |                  |  |
| 2                                                                | observational studies | not serious | not serious | not serious | not serious | none               | 223              | 173              | -                         | MD 2.23 lower<br>(3.81 lower to 0.83 lower)      | ⊕○○○<br>Very low |  |

CI: confidence interval; MD: mean difference; OR: odds ratio

## Explanations

- a. Estimate based on wide confidence interval crossing the line of no effect.
- b. Estimate based on small sample size.
- c. Heterogeneity is high (I-square=>60%).
